# Supplementary material for: Use of the word “evolution” in the time of a global pandemic
Source: Frontiers journal article supplement (doi:10.3389/fcomm.2024.1427596), 2024-07-29
Supplement: Data_Sheet_1.PDF [file Data_Sheet_1.PDF]

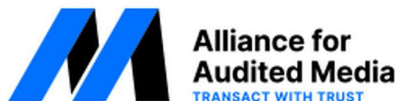

# AUDIT REPORT News Media

## THE NEW YORK TIMES

New York, New York

12 months ended September 30, 2020

|                                                                | Sun            | Avg<br>Mon-Fri | Mon            | Tue            | Wed            | Thu            | Fri            | Sat            |
|----------------------------------------------------------------|----------------|----------------|----------------|----------------|----------------|----------------|----------------|----------------|
| <b>EXECUTIVE SUMMARY</b>                                       | <b>862,826</b> | <b>401,515</b> | <b>384,237</b> | <b>389,159</b> | <b>388,334</b> | <b>387,199</b> | <b>458,644</b> | <b>454,465</b> |
| <b>The New York Times</b>                                      |                |                |                |                |                |                |                |                |
| Print                                                          | 861,610        | 389,280        | 371,436        | 377,066        | 376,241        | 375,154        | 446,502        | 453,248        |
| Digital Replica                                                | 1,216          | 12,235         | 12,801         | 12,093         | 12,093         | 12,045         | 12,142         | 1,217          |
| <b>TOTAL AVERAGE CIRCULATION</b>                               | <b>862,826</b> | <b>401,515</b> | <b>384,237</b> | <b>389,159</b> | <b>388,334</b> | <b>387,199</b> | <b>458,644</b> | <b>454,465</b> |
| <b>THE NEW YORK TIMES - PRINT</b>                              |                |                |                |                |                |                |                |                |
| <b>Paid Circulation</b>                                        |                |                |                |                |                |                |                |                |
| <b>Individually Paid Circulation</b>                           |                |                |                |                |                |                |                |                |
| Home Delivery and Mail                                         | 750,600        | 333,709        | 319,312        | 320,629        | 320,517        | 320,375        | 387,712        | 401,572        |
| Single Copy Sales                                              | 100,306        | 41,555         | 38,189         | 42,314         | 41,674         | 40,736         | 44,863         | 40,638         |
| <b>Total Average Individually Paid Circulation</b>             | <b>850,906</b> | <b>375,264</b> | <b>357,501</b> | <b>362,943</b> | <b>362,191</b> | <b>361,111</b> | <b>432,575</b> | <b>442,210</b> |
| <b>Business/Traveler Paid Circulation</b>                      |                |                |                |                |                |                |                |                |
| Group Subscriptions (Designated Employees)                     | 21             | 71             | 71             | 71             | 71             | 70             | 70             | 20             |
| Hotel Distribution - Room/Lobby Copies                         | 4,666          | 5,453          | 5,389          | 5,454          | 5,493          | 5,492          | 5,435          | 5,281          |
| <b>Total Average Business/Traveler Paid Circulation</b>        | <b>4,687</b>   | <b>5,524</b>   | <b>5,460</b>   | <b>5,525</b>   | <b>5,564</b>   | <b>5,562</b>   | <b>5,505</b>   | <b>5,301</b>   |
| <b>Total Average Paid Circulation - Print</b>                  | <b>855,593</b> | <b>380,788</b> | <b>362,961</b> | <b>368,468</b> | <b>367,755</b> | <b>366,673</b> | <b>438,080</b> | <b>447,511</b> |
| <b>Qualified Circulation</b>                                   |                |                |                |                |                |                |                |                |
| <b>Single Copy</b>                                             |                |                |                |                |                |                |                |                |
| Educational Copies                                             | 4,844          | 6,349          | 6,298          | 6,476          | 6,357          | 6,348          | 6,267          | 4,288          |
| Retail/Business                                                | 1,173          | 2,143          | 2,177          | 2,122          | 2,129          | 2,133          | 2,155          | 1,449          |
| <b>Total Average Single Copy</b>                               | <b>6,017</b>   | <b>8,492</b>   | <b>8,475</b>   | <b>8,598</b>   | <b>8,486</b>   | <b>8,481</b>   | <b>8,422</b>   | <b>5,737</b>   |
| <b>Total Average Qualified Circulation - Print</b>             | <b>6,017</b>   | <b>8,492</b>   | <b>8,475</b>   | <b>8,598</b>   | <b>8,486</b>   | <b>8,481</b>   | <b>8,422</b>   | <b>5,737</b>   |
| <b>Total Average Circulation - Print</b>                       | <b>861,610</b> | <b>389,280</b> | <b>371,436</b> | <b>377,066</b> | <b>376,241</b> | <b>375,154</b> | <b>446,502</b> | <b>453,248</b> |
| <b>THE NEW YORK TIMES - DIGITAL REPLICA</b>                    |                |                |                |                |                |                |                |                |
| <b>Paid Circulation</b>                                        |                |                |                |                |                |                |                |                |
| Subscription                                                   | 1,216          | 1,190          | 1,172          | 1,171          | 1,171          | 1,218          | 1,217          | 1,217          |
| <b>Total Average Paid Circulation - Digital Replica</b>        | <b>1,216</b>   | <b>1,190</b>   | <b>1,172</b>   | <b>1,171</b>   | <b>1,171</b>   | <b>1,218</b>   | <b>1,217</b>   | <b>1,217</b>   |
| <b>Qualified Circulation: Opt-in</b>                           |                |                |                |                |                |                |                |                |
| Educational Copies                                             |                | 11,045         | 11,629         | 10,922         | 10,922         | 10,827         | 10,925         |                |
| <b>Total Average Qualified Circulation - Digital Replica</b>   |                | <b>11,045</b>  | <b>11,629</b>  | <b>10,922</b>  | <b>10,922</b>  | <b>10,827</b>  | <b>10,925</b>  |                |
| <b>Total Average Circulation - Digital Replica</b>             | <b>1,216</b>   | <b>12,235</b>  | <b>12,801</b>  | <b>12,093</b>  | <b>12,093</b>  | <b>12,045</b>  | <b>12,142</b>  | <b>1,217</b>   |
| <b>TOTAL AVERAGE CIRCULATION - PRINT &amp; DIGITAL REPLICA</b> | <b>862,826</b> | <b>401,515</b> | <b>384,237</b> | <b>389,159</b> | <b>388,334</b> | <b>387,199</b> | <b>458,644</b> | <b>454,465</b> |

## Publishing Plans

|                           |                                                                                                                                                                                                   |
|---------------------------|---------------------------------------------------------------------------------------------------------------------------------------------------------------------------------------------------|
| <b>The New York Times</b> | Frequency: Daily<br>Delivery Vehicle(s): Print, online, mobile<br>Primary Circulation Classification: Paid<br>Print editions are distributed in broadsheet format.<br>Website(s): www.nytimes.com |
|---------------------------|---------------------------------------------------------------------------------------------------------------------------------------------------------------------------------------------------|

## AUDIT REPORT News Media

## THE WALL STREET JOURNAL

New York, NY - Chicago, IL - Palo Alto, CA

12 months ended September 30, 2020

|                                                         | Avg<br>Mon-Fri | Mon            | Tue            | Wed            | Thu            | Fri            | Wknd           |
|---------------------------------------------------------|----------------|----------------|----------------|----------------|----------------|----------------|----------------|
| <b>TOTAL AVERAGE CIRCULATION</b>                        | <b>903,418</b> | <b>904,574</b> | <b>904,804</b> | <b>903,473</b> | <b>901,932</b> | <b>902,371</b> | <b>942,258</b> |
| <b>Paid Circulation</b>                                 |                |                |                |                |                |                |                |
| <b>Individually Paid Circulation</b>                    |                |                |                |                |                |                |                |
| Home Delivery and Mail                                  | 767,389        | 767,560        | 767,521        | 768,318        | 767,508        | 766,087        | 796,105        |
| Single Copy Sales                                       | 21,212         | 20,866         | 20,962         | 20,885         | 21,074         | 22,228         | 39,942         |
| <b>Total Average Individually Paid Circulation</b>      | <b>788,601</b> | <b>788,426</b> | <b>788,483</b> | <b>789,203</b> | <b>788,582</b> | <b>788,315</b> | <b>836,047</b> |
| <b>Business/Traveler Paid Circulation</b>               |                |                |                |                |                |                |                |
| Group Subscriptions (Designated Employees)              | 20,319         | 20,419         | 20,372         | 20,253         | 20,270         | 20,287         | 19,646         |
| Hotel Distribution - Room/Lobby Copies                  | 30,075         | 30,407         | 30,770         | 29,470         | 29,770         | 29,957         | 29,732         |
| <b>Total Average Business/Traveler Paid Circulation</b> | <b>50,394</b>  | <b>50,826</b>  | <b>51,142</b>  | <b>49,723</b>  | <b>50,040</b>  | <b>50,244</b>  | <b>49,378</b>  |
| <b>Total Average Paid Circulation - Print</b>           | <b>838,995</b> | <b>839,252</b> | <b>839,625</b> | <b>838,926</b> | <b>838,622</b> | <b>838,559</b> | <b>885,425</b> |
| <b>Qualified Circulation</b>                            |                |                |                |                |                |                |                |
| <b>Home Delivery</b>                                    |                |                |                |                |                |                |                |
| Targeted                                                | 835            | 836            | 834            | 835            | 835            | 835            | 24,258         |
| <b>Total Average Home Delivery</b>                      | <b>835</b>     | <b>836</b>     | <b>834</b>     | <b>835</b>     | <b>835</b>     | <b>835</b>     | <b>24,258</b>  |
| <b>Single Copy</b>                                      |                |                |                |                |                |                |                |
| Educational Copies                                      | 24,445         | 24,484         | 24,905         | 25,567         | 23,829         | 23,479         | 7,154          |
| Retail/Business                                         | 39,143         | 40,002         | 39,440         | 38,145         | 38,646         | 39,498         | 25,421         |
| <b>Total Average Single Copy</b>                        | <b>63,588</b>  | <b>64,486</b>  | <b>64,345</b>  | <b>63,712</b>  | <b>62,475</b>  | <b>62,977</b>  | <b>32,575</b>  |
| <b>Total Average Qualified Circulation - Print</b>      | <b>64,423</b>  | <b>65,322</b>  | <b>65,179</b>  | <b>64,547</b>  | <b>63,310</b>  | <b>63,812</b>  | <b>56,833</b>  |
| <b>Total Average Circulation - Print</b>                | <b>903,418</b> | <b>904,574</b> | <b>904,804</b> | <b>903,473</b> | <b>901,932</b> | <b>902,371</b> | <b>942,258</b> |
| <b>TOTAL AVERAGE CIRCULATION</b>                        | <b>903,418</b> | <b>904,574</b> | <b>904,804</b> | <b>903,473</b> | <b>901,932</b> | <b>902,371</b> | <b>942,258</b> |

## Publishing Plans

|                                 |                                                                                                                                                                                                                          |
|---------------------------------|--------------------------------------------------------------------------------------------------------------------------------------------------------------------------------------------------------------------------|
| <b>THE WALL STREET JOURNAL.</b> | Frequency: Monday through Friday and Weekend<br>Delivery Vehicle(s): Print<br>Primary Circulation Classification: Paid<br>Home delivered print editions are distributed in broadsheet format.<br>Website(s): www.wsj.com |
|---------------------------------|--------------------------------------------------------------------------------------------------------------------------------------------------------------------------------------------------------------------------|

**TOTAL AVERAGE CIRCULATION:**

|                                                                   | Avg<br>Mon-Fri | Mon            | Tue            | Wed            | Thu            | Fri            | Wknd           |
|-------------------------------------------------------------------|----------------|----------------|----------------|----------------|----------------|----------------|----------------|
| <b>EASTERN - PRINT</b>                                            |                |                |                |                |                |                |                |
| <b>Paid Circulation</b>                                           |                |                |                |                |                |                |                |
| <b>Individually Paid Circulation</b>                              |                |                |                |                |                |                |                |
| Home Delivery and Mail                                            | 332,638        | 332,073        | 332,696        | 333,239        | 333,096        | 332,073        | 345,630        |
| Single Copy Sales                                                 | 10,116         | 9,994          | 9,991          | 9,945          | 10,013         | 10,618         | 18,898         |
| <b>Eastern - Total Average Individually Paid Circulation</b>      | <b>342,754</b> | <b>342,067</b> | <b>342,687</b> | <b>343,184</b> | <b>343,109</b> | <b>342,691</b> | <b>364,528</b> |
| <b>Business/Traveler Paid Circulation</b>                         |                |                |                |                |                |                |                |
| Group Subscriptions (Designated Employees)                        | 9,149          | 9,202          | 9,174          | 9,114          | 9,120          | 9,138          | 8,838          |
| Hotel Distribution - Room/Lobby Copies                            | 13,118         | 13,198         | 13,419         | 12,872         | 13,019         | 13,076         | 13,006         |
| <b>Eastern - Total Average Business/Traveler Paid Circulation</b> | <b>22,267</b>  | <b>22,400</b>  | <b>22,593</b>  | <b>21,986</b>  | <b>22,139</b>  | <b>22,214</b>  | <b>21,844</b>  |
| <b>Eastern - Total Average Paid Circulation - Print</b>           | <b>365,021</b> | <b>364,467</b> | <b>365,280</b> | <b>365,170</b> | <b>365,248</b> | <b>364,905</b> | <b>386,372</b> |
| <b>Qualified Circulation</b>                                      |                |                |                |                |                |                |                |
| <b>Home Delivery</b>                                              |                |                |                |                |                |                |                |
| Targeted                                                          | 503            | 515            | 503            | 499            | 496            | 503            | 13,418         |
| <b>Eastern - Total Average Home Delivery</b>                      | <b>503</b>     | <b>515</b>     | <b>503</b>     | <b>499</b>     | <b>496</b>     | <b>503</b>     | <b>13,418</b>  |
| <b>Single Copy</b>                                                |                |                |                |                |                |                |                |
| Educational Copies                                                | 10,662         | 10,672         | 10,862         | 11,170         | 10,384         | 10,238         | 3,060          |
| Retail/Business                                                   | 15,156         | 15,440         | 15,285         | 14,758         | 14,974         | 15,325         | 11,982         |
| <b>Eastern - Total Average Single Copy</b>                        | <b>25,818</b>  | <b>26,112</b>  | <b>26,147</b>  | <b>25,928</b>  | <b>25,358</b>  | <b>25,563</b>  | <b>15,042</b>  |
| <b>Eastern - Total Average Qualified Circulation - Print</b>      | <b>26,321</b>  | <b>26,627</b>  | <b>26,650</b>  | <b>26,427</b>  | <b>25,854</b>  | <b>26,066</b>  | <b>28,460</b>  |
| <b>Eastern - Total Average Circulation - Print</b>                | <b>391,342</b> | <b>391,094</b> | <b>391,930</b> | <b>391,597</b> | <b>391,102</b> | <b>390,971</b> | <b>414,832</b> |
| <b>CENTRAL - PRINT</b>                                            |                |                |                |                |                |                |                |
| <b>Paid Circulation</b>                                           |                |                |                |                |                |                |                |
| <b>Individually Paid Circulation</b>                              |                |                |                |                |                |                |                |
| Home Delivery and Mail                                            | 254,905        | 256,092        | 254,949        | 254,827        | 254,224        | 254,507        | 264,422        |
| Single Copy Sales                                                 | 6,139          | 6,000          | 6,062          | 6,055          | 6,123          | 6,439          | 11,767         |
| <b>Central - Total Average Individually Paid Circulation</b>      | <b>261,044</b> | <b>262,092</b> | <b>261,011</b> | <b>260,882</b> | <b>260,347</b> | <b>260,946</b> | <b>276,189</b> |
| <b>Business/Traveler Paid Circulation</b>                         |                |                |                |                |                |                |                |
| Group Subscriptions (Designated Employees)                        | 6,634          | 6,689          | 6,650          | 6,607          | 6,604          | 6,623          | 6,426          |
| Hotel Distribution - Room/Lobby Copies                            | 9,340          | 9,469          | 9,571          | 9,160          | 9,237          | 9,265          | 9,036          |
| <b>Central - Total Average Business/Traveler Paid Circulation</b> | <b>15,974</b>  | <b>16,158</b>  | <b>16,221</b>  | <b>15,767</b>  | <b>15,841</b>  | <b>15,888</b>  | <b>15,462</b>  |
| <b>Central - Total Average Paid Circulation - Print</b>           | <b>277,018</b> | <b>278,250</b> | <b>277,232</b> | <b>276,649</b> | <b>276,188</b> | <b>276,834</b> | <b>291,651</b> |
| <b>Qualified Circulation</b>                                      |                |                |                |                |                |                |                |
| <b>Home Delivery</b>                                              |                |                |                |                |                |                |                |
| Targeted                                                          | 188            | 182            | 188            | 191            | 192            | 188            | 6,156          |
| <b>Central - Total Average Home Delivery</b>                      | <b>188</b>     | <b>182</b>     | <b>188</b>     | <b>191</b>     | <b>192</b>     | <b>188</b>     | <b>6,156</b>   |
| <b>Single Copy</b>                                                |                |                |                |                |                |                |                |
| Educational Copies                                                | 7,689          | 7,729          | 7,832          | 8,039          | 7,488          | 7,371          | 2,358          |
| Retail/Business                                                   | 10,629         | 10,966         | 10,690         | 10,322         | 10,478         | 10,698         | 7,221          |
| <b>Central - Total Average Single Copy</b>                        | <b>18,318</b>  | <b>18,695</b>  | <b>18,522</b>  | <b>18,361</b>  | <b>17,966</b>  | <b>18,069</b>  | <b>9,579</b>   |
| <b>Central - Total Average Qualified Circulation - Print</b>      | <b>18,506</b>  | <b>18,877</b>  | <b>18,710</b>  | <b>18,552</b>  | <b>18,158</b>  | <b>18,257</b>  | <b>15,735</b>  |
| <b>Central - Total Average Circulation - Print</b>                | <b>295,524</b> | <b>297,127</b> | <b>295,942</b> | <b>295,201</b> | <b>294,346</b> | <b>295,091</b> | <b>307,386</b> |

**TOTAL AVERAGE CIRCULATION: (Continued)**

|                                                                   | Avg<br>Mon-Fri | Mon            | Tue            | Wed            | Thu            | Fri            | Wknd           |
|-------------------------------------------------------------------|----------------|----------------|----------------|----------------|----------------|----------------|----------------|
| <b>WESTERN - PRINT</b>                                            |                |                |                |                |                |                |                |
| <b>Paid Circulation</b>                                           |                |                |                |                |                |                |                |
| <b>Individually Paid Circulation</b>                              |                |                |                |                |                |                |                |
| Home Delivery and Mail                                            | 179,846        | 179,395        | 179,876        | 180,252        | 180,188        | 179,507        | 186,053        |
| Single Copy Sales                                                 | 4,957          | 4,872          | 4,909          | 4,885          | 4,938          | 5,171          | 9,277          |
| <b>Western - Total Average Individually Paid Circulation</b>      | <b>184,803</b> | <b>184,267</b> | <b>184,785</b> | <b>185,137</b> | <b>185,126</b> | <b>184,678</b> | <b>195,330</b> |
| <b>Business/Traveler Paid Circulation</b>                         |                |                |                |                |                |                |                |
| Group Subscriptions (Designated Employees)                        | 4,536          | 4,528          | 4,548          | 4,532          | 4,546          | 4,526          | 4,382          |
| Hotel Distribution - Room/Lobby Copies                            | 7,617          | 7,740          | 7,780          | 7,438          | 7,514          | 7,616          | 7,690          |
| <b>Western - Total Average Business/Traveler Paid Circulation</b> | <b>12,153</b>  | <b>12,268</b>  | <b>12,328</b>  | <b>11,970</b>  | <b>12,060</b>  | <b>12,142</b>  | <b>12,072</b>  |
| <b>Western - Total Average Paid Circulation - Print</b>           | <b>196,956</b> | <b>196,535</b> | <b>197,113</b> | <b>197,107</b> | <b>197,186</b> | <b>196,820</b> | <b>207,402</b> |
| <b>Qualified Circulation</b>                                      |                |                |                |                |                |                |                |
| <b>Home Delivery</b>                                              |                |                |                |                |                |                |                |
| Targeted                                                          | 144            | 139            | 143            | 145            | 147            | 144            | 4,684          |
| <b>Western - Total Average Home Delivery</b>                      | <b>144</b>     | <b>139</b>     | <b>143</b>     | <b>145</b>     | <b>147</b>     | <b>144</b>     | <b>4,684</b>   |
| <b>Single Copy</b>                                                |                |                |                |                |                |                |                |
| Educational Copies                                                | 6,094          | 6,083          | 6,211          | 6,358          | 5,957          | 5,870          | 1,736          |
| Retail/Business                                                   | 13,358         | 13,596         | 13,465         | 13,065         | 13,194         | 13,475         | 6,218          |
| <b>Western - Total Average Single Copy</b>                        | <b>19,452</b>  | <b>19,679</b>  | <b>19,676</b>  | <b>19,423</b>  | <b>19,151</b>  | <b>19,345</b>  | <b>7,954</b>   |
| <b>Western - Total Average Qualified Circulation - Print</b>      | <b>19,596</b>  | <b>19,818</b>  | <b>19,819</b>  | <b>19,568</b>  | <b>19,298</b>  | <b>19,489</b>  | <b>12,638</b>  |
| <b>Western - Total Average Circulation - Print</b>                | <b>216,552</b> | <b>216,353</b> | <b>216,932</b> | <b>216,675</b> | <b>216,484</b> | <b>216,309</b> | <b>220,040</b> |
| <b>Total Average Circulation - Print</b>                          | <b>903,418</b> | <b>904,574</b> | <b>904,804</b> | <b>903,473</b> | <b>901,932</b> | <b>902,371</b> | <b>942,258</b> |
| <b>TOTAL AVERAGE CIRCULATION</b>                                  | <b>903,418</b> | <b>904,574</b> | <b>904,804</b> | <b>903,473</b> | <b>901,932</b> | <b>902,371</b> | <b>942,258</b> |

**AUDIT STATEMENT**

|                                                                   | Avg Mon-Fri            |                      |            | Mon                    |                      |            | Tue                    |                      |            | Wed                    |                      |            |
|-------------------------------------------------------------------|------------------------|----------------------|------------|------------------------|----------------------|------------|------------------------|----------------------|------------|------------------------|----------------------|------------|
|                                                                   | Audited<br>Circulation | Publisher's<br>Claim | Difference |
| The Wall Street Journal<br>Eastern, Central & Western<br>Editions | 903,418                | 903,418              |            | 904,574                | 904,574              |            | 904,804                | 904,804              |            | 903,473                | 903,473              |            |
| Total Average Circulation                                         | 903,418                | 903,418              |            | 904,574                | 904,574              |            | 904,804                | 904,804              |            | 903,473                | 903,473              |            |
|                                                                   | Thu                    |                      |            | Fri                    |                      |            | Wknd                   |                      |            |                        |                      |            |
|                                                                   | Audited<br>Circulation | Publisher's<br>Claim | Difference | Audited<br>Circulation | Publisher's<br>Claim | Difference | Audited<br>Circulation | Publisher's<br>Claim | Difference |                        |                      |            |
| The Wall Street Journal<br>Eastern, Central & Western<br>Editions | 901,932                | 901,932              |            | 902,371                | 902,371              |            | 942,258                | 942,258              |            |                        |                      |            |
| Total Average Circulation                                         | 901,932                | 901,932              |            | 902,371                | 902,371              |            | 942,258                | 942,258              |            |                        |                      |            |
