# Supplementary material for: Use of the word “evolution” in the time of a global pandemic
Source: Frontiers journal article supplement (doi:10.3389/fcomm.2024.1427596), 2024-07-29
Supplement: Table_1.XLSX [file Table_1.XLSX]

## Sheet: S1 Table Articles.xlsx
Country	Newspaper	Title	Date	Pandemic Stage	Month	Uses Evolve
USA	WSJ	World News: Coronaviruses Pose a Growing Global Threat	2020-01-11	Before	1	yes
INDIA	TOI	Mysterious coronavirus may spread from human to human, says WHO	2020-01-21	Before	1	no
INDIA	TOI	Two US firms in race to develop vaccine	2020-01-26	Before	1	yes
NIGERIA	The Nation	Nigeria 's plans against Novel Coronavirus	2020-01-28	Before	1	yes
AUS	SMH	What we know about coronavirus;Explainer	2020-01-31	Before	1	no
CANADA	Globe and Mail	OPINION;Our coronavirus response requires good risk communication - leave the ghouls out of it;We need to apply lessons learned during the SARS, H5N1 outbreaks and avoid using needlessly sensationalist language	2020-02-01	Before	2	yes
INDIA	TOI	Yale prof warns over handling of coronavirus cases	2020-02-01	Before	2	no
INDIA	Hindu	Is Vizag ready to handle nCoV?	2020-02-02	Before	2	no
USA	NYT	Rise in Cases Suggests Epidemic Is Pandemic: [Foreign Desk]	2020-02-03	Before	2	no
CANADA	Globe and Mail	OPINION;The time to tackle the next epidemic is now;Pathogenic threats are flaring up worldwide with growing frequency, and we need to address the underlying causes	2020-02-11	Before	2	yes
CANADA	Globe and Mail	Varied rates of virus spread raise questions;Specialists in China, Japan point to role officials responding to epidemic may have played in severe regional outbreaks	2020-02-20	Before	2	no
INDIA	TOI	Coronavirus readiness: Panchkula needs infrared thermometers	2020-02-20	Before	2	no
UK	Daily Mail	MORE AGGRESSIVE STRAIN EMERGES IN CHINA	2020-03-05	Before	3	no
UK	Sun	THE BUG BANG;COVID-19 FLU CRISIS PANIC GROWS AS 87 BRITS INFECTED BIGGEST UK LEAP IN CASES EPIDEMIC FEARS SOAR ACTION PLAN IS RAMPED UP	2020-03-05	Before	3	no
UK	Daily Mail	DON'T PANIC	2020-03-10	Before	3	yes
INDIA	Hindu	COVID-19 not a virus you can bottle up but unlikely a bioweapon: NCBS chief	2020-03-25	Before	3	no
INDIA	TOI	Spike protein of Indian strain of nCov undergoes unique mutation	2020-04-04	Before	4	no
AUS	Age	Conspiracy theories going viral	2020-04-06	Before	4	yes
NIGERIA	Punch	Lessons to learn from 1918 Spanish flu as the world battles COVID-19	2020-04-08	Before	4	no
UK	Daily Mail	HOW SICKENING THAT CHINA WILL NOW EXPLOIT THE FALLOUT OF VIRUS IT GAVE THE WORLD	2020-04-09	Before	4	yes
UK	Daily Mail	CORONA: WHAT WE NOW KNOW	2020-04-11	Before	4	no
NIGERIA	The Nation	To conspiracy theorists	2020-04-11	Before	4	no
INDIA	Hindu	Coronavirus | Data is key to control of this pandemic, says Soumya Swaminathan	2020-04-12	Before	4	yes
UK	Daily Mail	PASTEUR REPORT BOMBSHELL: CATTLE, SHEEP AND EVEN CATS	2020-04-18	Before	4	yes
NIGERIA	Punch	Mass testing best approach to tame COVID-19 not lockdown –Njemanze	2020-04-21	Before	4	no
NIGERIA	Punch	Seven things you shouldn’t do when lockdown ends	2020-05-02	Before	5	no
UK	Daily Mail	HOW PM IGNORED HIS OWN ADVICE ON SHAKING HANDS	2020-05-06	Before	5	no
USA	NYT	Virulent Mutation? Geneticists Have Doubts: [Foreign Desk]	2020-05-07	Before	5	yes
INDIA	Hindu	Key ICMR panel on vaccines dissolved	2020-05-10	Before	5	no
INDIA	TOI	Significant mutation in virus: Hamdard study	2020-05-19	Before	5	yes
USA	WSJ	A Political Assault on Antibody Tests	2020-05-20	Before	5	no
INDIA	TOI	85% of mutations found were from hotspots like city'	2020-05-27	Before	5	no
USA	WSJ	REVIEW --- So Where Did the Virus Come From? --- Research into the origins of the new coronavirus raises questions about how it became so infectious in human beings.	2020-05-30	Before	5	yes
NIGERIA	The Nation	New strain of COVID-19 in Nigeria possible - Minister	2020-06-11	Before	6	no
NIGERIA	Punch	PTF meets governors, security agencies as COVID-19 cases surge	2020-06-12	Before	6	no
CANADA	Globe and Mail	Promising treatments for COVID-19 advanced by Canadian scientists;Innovators hope to translate discoveries into commercial success	2020-06-18	Before	6	no
INDIA	TOI	CDRI, IITR study to decode Covid conundrum	2020-06-28	Before	6	no
NIGERIA	Punch	Nigeria may develop new strain of COVID-19, scientists warn	2020-06-28	Before	6	no
INDIA	TOI	Recovery Rate Of Foreign Returnees Is Around 22%, Below 42% For Local Cases	2020-06-29	Before	6	no
USA	NYT	Did a Mutation Help the Coronavirus Spread? More Evidence, but Lingering Questions [With graphic(s)]	2020-07-02	Before	7	yes
INDIA	TOI	ILS establishes cultures of coronavirus	2020-07-13	Before	7	no
CANADA	Globe and Mail	Will COVID-19 resemble the annual flu?	2020-07-14	Before	7	no
CANADA	Star	How did Europe get it so wrong?;The continent said it was prepared. Pride was its downfall	2020-07-25	Before	7	no
INDIA	TOI	All five clades of Covid-19 genome found in Odisha	2020-08-02	Before	8	yes
USA	WSJ	The Covid Storm: A Pandemic Was Inevitable. Why Was No One Ready? --- Scientists warned of pathogens for decades, yet when Covid-19 arrived, the world had few resources and little understanding	2020-08-14	Before	8	no
CANADA	Star	We're all living in a science-fiction novel now;Let's make sure that when this ends, it'll be a sunnier day for everyone	2020-08-15	Before	8	no
UK	Sun	TWO EU PATIENTS GET COVID AGAIN	2020-08-26	Before	8	no
INDIA	Hindu	Coronavirus | Different kinds of SARS-CoV-2 exist in India but none more lethal than the other: Indian Academy of Sciences President	2020-08-27	Before	8	yes
INDIA	TOI	New Covid-19 sub-strain may be behind spike in T +ve cases	2020-09-03	Before	9	no
INDIA	TOI	Covid-19 in Mumbai: After suspected reinfection, hospital sends samples for genomic study	2020-09-10	Before	9	no
CANADA	Star	COVID vaccine could also help cure common cold;U.S. army researchers targetting all coronavirus, including cold strains	2020-09-19	Before	9	no
INDIA	TOI	Covid roundup: No 'significant mutation' in India, sharp decline in testing & more	2020-09-21	Before	9	no
INDIA	TOI	G-strain mutation won't affect Covid-19 vaccine	2020-10-09	Before	10	yes
USA	NYT	The Race to Develop An Antibody Cocktail: [Science Desk]	2020-10-13	Before	10	no
USA	WSJ	Jersey Shore Town Tied to NYC Uptick	2020-10-19	Before	10	no
UK	Daily Mail	MINK STRAIN COULD SET BACK VACCINE'	2020-11-09	Before	11	no
USA	NYT	Before a Vaccine, a Hard Road Ahead: [National Desk]	2020-11-13	Before	11	no
UK	Daily Mail	SHAUN THE SHEEP AND PADDY FIELDS: WHERE THE MONEY'S SPENT	2020-11-24	Before	11	yes
UK	Sun	NEW STRAINS OF VIRUS NOT SPREADING FASTER	2020-11-26	Before	11	no
INDIA	Hindu	Karnataka has seen seven lineages of SARS-CoV-2: Expert	2020-11-27	Before	11	no
USA	WSJ	World News: Millions of Dead Mink Pose Gruesome Problem for Danes	2020-12-02	Before	12	no
USA	WSJ	Decoding the NFL's Covid Cases --- The NFL uses genomic sequencing to map out how coronavirus spreads through teams.	2020-12-12	Before	12	no
USA	NYT	February Superspreader Kept Spreading, Infecting as Many as 300,000 by October: [Foreign Desk]	2020-12-13	Before	12	no
UK	Daily Mail	NEW STRAIN LINKED TO SURGES IN THE SOUTH	2020-12-15	Before	12	yes
UK	Sun	Fears after new Covid strain found in the south of England;WARNING OVER HOMECOMING TRAVEL PLANS 'TOO EARLY' TO SAY IF IT'S HERE YET	2020-12-15	Before	12	no
UK	Sun	STRAINGER DANGER;NIC UNDER PRESSURE..BUT JABS DRIVE GATHERS PACE Fresh curbs warning over mutated virus Fear new 'variant' spreads at faster rate viru	2020-12-15	Before	12	no
USA	WSJ	U.S. News: Variant Of Virus Identified In the U.K.	2020-12-15	Before	12	no
INDIA	TOI	Indore: Repeat positive tests increase hospital stay of Covid patients in November	2020-12-16	Before	12	no
UK	Sun	8 DEAD, 329 NEW CASES	2020-12-16	Before	12	no
UK	Sun	BUBBLE 'N' STRIFE;THREAT TO FESTIVE SEASON AS MILLIONS GO INTO TIER 3 Bust-up over 5-day Xmas easing PM under pressure to give way today	2020-12-16	Before	12	no
UK	Sun	TIER WE GO AGAIN…;NIC CHOPS XMAS SHORT AND CHANGES SCHOOLS RETURN XMAS ON..FOR ONE DAY ONLY CROSS-BORDER TRAVEL BAN LOCKDOWN ON BOXING DAY SCHOOLS CLOSED 'TIL JAN 18 SHOPS & PUBS DEVASTATION	2020-12-20	After	12	no
UK	Sun	WE FACE NIGHTMARE	2020-12-20	After	12	yes
UK	Sun	JINGLE HELL;PM ANNOUNCES NEW CLAMP ON XMAS Boris: Virus has changed its attack Tier 4 lockdown wrecks festive hols	2020-12-20	After	12	no
NIGERIA	Punch	Nigeria lost 10 children to COVID-19 — NCDC	2020-12-20	After	12	no
AUS	SMH	New virus type disease's 'worst moment'	2020-12-21	After	12	no
CANADA	Star	Canada suspends flights coming from Britain;Recently discovered coronavirus mutation prompts quick reaction	2020-12-21	After	12	no
INDIA	Hindu	Morning Digest: Health Ministry team to meet on mutant variant of coronavirus, India and U.S. mull unfinished business as Trump tenure winds down, and more	2020-12-21	After	12	no
INDIA	Hindu	Flyers from United Kingdom to be tested, quarantined	2020-12-22	After	12	no
UK	Daily Mail	PERFECT STORM BATTERS POUND AND SHARES	2020-12-22	After	12	no
UK	Sun	DON'T BE SO SHELFISH;PM URGES BRITS NOT TO GRAB ALL THE TURKEYS Fury at panic-buying shoppers Shelves stripped of Xmas food Fears as France cuts off goods But stores say there's plenty	2020-12-22	After	12	no
USA	NYT	Coronavirus Update: [Foreign Desk]	2020-12-22	After	12	no
USA	NYT	EU Urges Member Countries to Lift Blanket Travel Bans for Britain	2020-12-22	After	12	no
USA	NYT	U.K. and France Work to Help Stranded Truckers and Ease Fears of Food Shortages	2020-12-22	After	12	no
NIGERIA	Punch	UK’s new COVID-19 variant found in Nigeria, scientists say	2020-12-22	After	12	yes
NIGERIA	The Nation	Govt mulls travel ban	2020-12-22	After	12	no
CANADA	Globe and Mail	Britain's advanced tracking system led to variant find	2020-12-23	After	12	no
INDIA	TOI	New Covid strain found in UK not seen in India so far, says govt	2020-12-23	After	12	no
INDIA	TOI	Uttar Pradesh's weekly Covid-19 positivity rate down to 1%, 1,277 new cases reported in 24 hours	2020-12-23	After	12	yes
INDIA	TOI	Fresh cases go below 1,000	2020-12-23	After	12	no
INDIA	Hindu	COVID screening mandatory for all U.K. returnees in A.P.	2020-12-23	After	12	no
USA	NYT	The Mutant Virus Is Loose. Travel Bans Won't Stop Its Spread.: [Foreign Desk]	2020-12-23	After	12	no
GUYANA	Guyana Chronicle	No decision yet on UK travel ban amid new COVID-19 strain	2020-12-23	After	12	no
INDIA	TOI	Delhi: Covid strikes weak harder, recovery time's longer too	2020-12-24	After	12	yes
INDIA	TOI	UK returnees to be screened to avoid spread of new strain	2020-12-24	After	12	no
INDIA	TOI	11pm to 6am: Night curfew starts in Nagpur	2020-12-24	After	12	no
INDIA	TOI	Delhi: Came back from UK in last 1 month? Expect govt's knock on your door	2020-12-24	After	12	no
UK	Daily Mail	Q&A	2020-12-24	After	12	no
UK	Daily Mail	MERKEL PULLS STRINGS AT 11TH HOUR TO AVOID NO DEAL - NOW WE'RE FINALLY SET TO BID ADIEU	2020-12-24	After	12	no
USA	WSJ	U.S. News: How Scientists Tracked New Variant	2020-12-24	After	12	no
INDIA	TOI	9 more UK fliers test positive for Covid, number reaches 29	2020-12-25	After	12	no
INDIA	TOI	24 UK returnees quarantined in Bhopal	2020-12-25	After	12	no
INDIA	TOI	Karnataka orders night curfew: No public new year celebrations	2020-12-25	After	12	no
INDIA	TOI	Maharashrta tracks flyers from UK who landed after November 25	2020-12-25	After	12	no
INDIA	TOI	846 post-Nov 25 arrivals from UK under Covid lens	2020-12-25	After	12	no
INDIA	Hindu	Coronavirus | Over 6,000 travellers from U.K. traced across States	2020-12-25	After	12	no
INDIA	Hindu	Seven UK returnees test positive	2020-12-25	After	12	no
USA	NYT	U.S. Will Require Negative Coronavirus Test for All Travelers From the U.K.: [Foreign Desk]	2020-12-25	After	12	no
NIGERIA	Punch	COVID-19 warnings dominate Buhari, govs’ Xmas messages	2020-12-25	After	12	no
CANADA	Globe and Mail	COVID-19 variants reveal evolution's power to rearm	2020-12-26	After	12	yes
INDIA	TOI	India's RT-PCR kits can catch infectious variant: Experts	2020-12-26	After	12	no
INDIA	TOI	T on alert as 7 who came from UK test Covid +ve	2020-12-26	After	12	no
UK	Daily Mail	TOTAL LOCKDOWN 3 LOOMING	2020-12-26	After	12	no
UK	Daily Mail	US JOINS THE TRAVEL BAN ON UK ARRIVALS WITHOUT TEST	2020-12-26	After	12	no
INDIA	TOI	More coronavirus strains may emerge, SOPs will keep changing: Experts	2020-12-27	After	12	no
INDIA	TOI	334 new Covid-19 cases reported in Odisha	2020-12-27	After	12	no
INDIA	Hindu	Coronavirus | Oxford COVID-19 vaccine may become the first to get Indian regulator's nod for emergency use	2020-12-27	After	12	no
INDIA	Hindu	Karnataka government wants to start physical classes for intermediate semesters	2020-12-27	After	12	no
UK	Sun	Better days ahead.";JOY AS FIRST VACCINE BATCH ARRIVES JAB ROLLOUT BEGINS ON WEDNESDAY	2020-12-27	After	12	no
USA	NYT	How Can We Achieve Herd Immunity? Experts Are Quietly Upping the Number: [Foreign Desk]	2020-12-27	After	12	no
INDIA	TOI	Why a 'more contagious' coronavirus may not be as bad as it sounds	2020-12-28	After	12	yes
INDIA	TOI	Eight from UK test positive for Covid in Kerala	2020-12-28	After	12	no
UK	Sun	Party sacrifice could make a big difference;ON CALL with Dr Zoe	2020-12-28	After	12	no
USA	NYT	E.U. Sets in Motion a Plan to Vaccinate Nearly Half a Billion People: [Foreign Desk]	2020-12-28	After	12	yes
INDIA	TOI	Uttar Pradesh CM orders RT-PCR test of UK returnees	2020-12-29	After	12	no
INDIA	Hindu	After government at doorstep Mamata announces redressal camp in neighborhood	2020-12-29	After	12	no
USA	NYT	Everything Is Shut Down, Except for the Slopes: [Foreign Desk]	2020-12-29	After	12	no
INDIA	TOI	Can't dismiss seriousness of mutation: ICMR scientists	2020-12-30	After	12	yes
INDIA	TOI	NY ahead, MHA extends guidelines till Jan 31	2020-12-30	After	12	no
INDIA	Hindu	Coronavirus | Kerala on high alert, no reports of new variant: Health Minister	2020-12-30	After	12	no
USA	NYT	Easily Spread Variant Found in Colorado: [Correction]	2020-12-30	After	12	no
USA	NYT	U.K. Authorizes COVID-19 Vaccine From Oxford and AstraZeneca	2020-12-30	After	12	no
CANADA	Globe and Mail	Britain approves Oxford and AstraZeneca's vaccine	2020-12-31	After	12	no
INDIA	TOI	UK variant has potential for 2nd wave: CCMB chief	2020-12-31	After	12	no
INDIA	TOI	Noida woman 2nd UP patient with UK strain of Covid-19	2020-12-31	After	12	no
INDIA	TOI	Public celebrations of New Year banned in Vij	2020-12-31	After	12	no
INDIA	TOI	Noida woman tests +ve for UK variant	2021-01-01	After	13	no
INDIA	TOI	Kolkata flyer from London tests positive for mutated virus	2021-01-01	After	13	no
INDIA	Hindu	State to conduct second round of sero survey in Jan.	2021-01-01	After	13	no
INDIA	Hindu	No mutated strain found among U.K. returnees in Odisha	2021-01-01	After	13	no
INDIA	TOI	Rajasthan: Health officials keep an eye on unusual trend of Covid	2021-01-02	After	13	no
NIGERIA	Punch	COVID-19: Doubts, violation of safety protocols heighten deadlier second wave risk	2021-01-02	After	13	yes
INDIA	TOI	Bharat Biotech's Covaxin too gets nod for emergency use	2021-01-03	After	13	no
UK	Sun	Lions in the sand for tour	2021-01-03	After	13	no
INDIA	TOI	Night curfew in 13 Rajasthan districts extended till January 15	2021-01-04	After	13	no
INDIA	Hindu	Coronavirus | India approves COVID-19 vaccines Covishield and Covaxin for emergency use	2021-01-04	After	13	no
NIGERIA	Punch	I spent last Christmas at isolation centre, Covid is real —Ali Baba	2021-01-04	After	13	no
CANADA	Globe and Mail	Doctors call for governments to speed up immunizations	2021-01-05	After	13	no
INDIA	TOI	State's health experts look forward to Covid vaccine with hope	2021-01-05	After	13	no
INDIA	Hindu	India's growth bucks global trend: Finance Ministry review	2021-01-05	After	13	no
UK	Daily Mail	IT'S BACK TO SQUARE ONE	2021-01-05	After	13	no
USA	WSJ	World News: Johnson Imposes Third Lockdown as New Strain Spreads	2021-01-05	After	13	no
AUS	Age	Australian Grand Prix date again in doubt	2021-01-06	After	13	no
AUS	SMH	National lockdown, again, as cases surge	2021-01-06	After	13	no
CANADA	Globe and Mail	Air Canada hires social influencers to promote travel during pandemic	2021-01-06	After	13	no
CANADA	Star	It's going to get worse than it is right now';Hospitals try to stretch ICU capacity as cases skyrocket in Ontario	2021-01-06	After	13	no
INDIA	TOI	Three more test positive in Delhi for mutated Covid-19 virus strain	2021-01-06	After	13	yes
UK	Sun	FLIGHTING TALK;CURBS ON ARRIVALS..AS HOOPS FACE DUBAI FLAK Moves to stop bug-hit travellers getting in UK	2021-01-06	After	13	no
INDIA	TOI	Vax row: PM's intervention sought	2021-01-07	After	13	no
INDIA	TOI	5-yr-old boy among 3 who tested +ve for UK strain	2021-01-07	After	13	no
INDIA	Hindu	Extend ban on U.K. flights till January 31: Arvind Kejriwal	2021-01-07	After	13	no
UK	Sun	We are in a battle against a deadly and ever changing virus.. we must stay at home';COVID-19 PANDEMIC GOVT'S PLEA AS NATION'S CASES SOAR	2021-01-07	After	13	no
AUS	Age	Mutant virus detected in state's second wave;exclusive	2021-01-08	After	13	no
INDIA	TOI	Eight of 20 patients at Delhi's Lok Nayak Hospital test +ve for UK strain	2021-01-08	After	13	no
INDIA	Hindu	Passenger flights from U.K. to India resumes services	2021-01-08	After	13	no
USA	NYT	False Reports of a New ‘U.S. Variant’ Came from White House Task Force	2021-01-08	After	13	yes
NIGERIA	The Nation	Pfizer COVID-19 vaccine likely to work against new variants - Study	2021-01-08	After	13	no
AUS	Age	Game changer': World braced for march of mutating virus	2021-01-09	After	13	no
AUS	SMH	Vigilance 'key in fight against rogue variants';New Threat	2021-01-09	After	13	no
INDIA	TOI	One suspected patient 'tests -ve' for UK mutated variant of Covid-19	2021-01-09	After	13	no
INDIA	TOI	Deaths in Maharashtra rise even as fresh Covid cases keep dropping	2021-01-09	After	13	no
INDIA	TOI	Two patients with UK strain test negative	2021-01-09	After	13	no
INDIA	TOI	Kerala, 2 other states account for 50% of new Covid cases	2021-01-09	After	13	no
USA	NYT	Coronavirus Update: [Foreign Desk]	2021-01-09	After	13	no
USA	NYT	Keeping Track of Covid-19, and the Cat: [Correction]	2021-01-10	After	13	yes
GUYANA	Kaieteur	Coronavirus: The more we facilitate its spread, the more mutations we will have	2021-01-10	After	13	no
INDIA	Hindu	Coronavirus | IMA endorses safety, efficacy of both vaccines cleared by India	2021-01-11	After	13	no
USA	WSJ	Maximize the Vaccine	2021-01-13	After	13	yes
INDIA	TOI	386 new Covid cases, 16 more deaths in Delhi	2021-01-14	After	13	no
UK	Daily Mail	STILL THEY FLY IN	2021-01-15	After	13	no
UK	Sun	COPACABANA;FRESH CURBS AIMED AT HALTING DEADLY VIRUS Travel ban on Portugal & South America Sparked by fears on new Brazil strain	2021-01-15	After	13	no
GUYANA	Guyana Chronicle	UK bans travel from Guyana, other South American countries	2021-01-15	After	13	no
USA	NYT	One Year Into Pandemic, Coronavirus Deaths Pass Two Million Worldwide: [Foreign Desk]	2021-01-16	After	13	no
INDIA	TOI	Expecting pandemic to end with vaccine roll out is too optimistic an assumption'	2021-01-18	After	13	no
USA	NYT	Since One Mask Is Good, Would Two Be Better?: [Science Desk]	2021-01-19	After	13	no
CANADA	Star	Sudbury officials keep an eye on COVID-19 variant	2021-01-20	After	13	no
USA	NYT	What You Can Do to Avoid the New Coronavirus Variant Right Now	2021-01-20	After	13	no
INDIA	Hindu	U.K. will take measures to attract students, skilled labour'	2021-01-22	After	13	no
UK	Sun	American toll higher than WWII	2021-01-22	After	13	no
UK	Sun	UK's strain 'could be more fatal'	2021-01-23	After	13	no
USA	NYT	U.K. Variant May Be Deadlier, Johnson Warns: [Foreign Desk]	2021-01-23	After	13	no
USA	NYT	U.S. Passes 25 Million Confirmed Coronavirus Cases	2021-01-23	After	13	no
CANADA	Star	Modelling predicts nearly 4,000 daily cases;Data show new variant, school reopenings could spike infection numbers	2021-01-24	After	13	no
CANADA	Globe and Mail	Expert warns against hoarding vaccines	2021-01-25	After	13	no
INDIA	TOI	UK, Brazil, SA returnees must pass through careful checks: Task force	2021-01-25	After	13	no
UK	Sun	BREAK AT THE BORDER;COVID-19 PANDEMIC PUSH FOR ZERO COVID IRELAND STRATEGY Labour calling for Army at checkpoints Vaccines rollout is hit by factory delays	2021-01-25	After	13	no
USA	NYT	Britain's Alarm Over Virus Variant Bolsters the Case for a Lockdown: [Foreign Desk]	2021-01-25	After	13	no
INDIA	TOI	Virus is getting smarter, will our vaccines work?	2021-01-26	After	13	no
UK	Sun	Get jabs plan right and soon	2021-01-26	After	13	no
USA	NYT	Biden Vows to Reopen Classrooms Quickly. It Will Not Be Easy.: [Foreign Desk]	2021-01-26	After	13	no
CANADA	Globe and Mail	School officials in hot spots express concern over lack of transparency on return to classrooms	2021-01-27	After	13	no
UK	Daily Mail	IMF: RECOVERY WILL TAKE LONGER	2021-01-27	After	13	no
USA	NYT	Coronavirus Update: [Foreign Desk]	2021-01-27	After	13	no
AUS	SMH	Here's the rub on the COVID jab	2021-01-28	After	13	no
CANADA	Star	Canada not adopting two-mask advice;Officials in U.S., Europe are now telling residents to double up on layers	2021-01-28	After	13	no
INDIA	TOI	Vaccinate fast, or the virus will become deadlier	2021-01-28	After	13	no
AUS	Age	No-exemption quarantine for returning residents	2021-01-29	After	13	no
INDIA	Hindu	Coronavirus | Novavax vaccine, to be made by SII, shows 89% efficacy in U.K.	2021-01-29	After	13	no
UK	Daily Mail	ANOTHER SHOT IN THE ARM FOR BRITAIN!	2021-01-29	After	13	no
INDIA	TOI	Why the West is ditching cloth masks, nose swabs	2021-01-30	After	13	no
USA	NYT	Coronavirus Update: [Foreign Desk]	2021-01-30	After	13	yes
USA	NYT	Which Version Is Best? Anything You Can Get To Limit Severe Illness: [Foreign Desk]	2021-01-30	After	13	yes
USA	WSJ	World News: World Watch	2021-01-30	After	13	no
USA	WSJ	U.S. News: New Vaccine: How It Works, Differs	2021-01-30	After	13	no
AUS	Age	Scientists fear variant may affect vaccines	2021-02-02	After	14	no
CANADA	Globe and Mail	Four ETFs for confused investors;OPINION	2021-02-02	After	14	no
CANADA	Star	Worst pandemic month in U.S. ends with hope;COVID-19 cases moving down, while vaccination numbers are picking up	2021-02-02	After	14	no
UK	Sun	TEST & CHASE;URGENT DOOR-TO-DOOR R BLITZ TO HALT MUTATION S Africa bug in 8 areas	2021-02-02	After	14	no
AUS	Age	Testing goes door to door in virus fight	2021-02-03	After	14	no
CANADA	Globe and Mail	Canada to start domestic production months after vaccine deadline	2021-02-03	After	14	no
UK	Daily Mail	THE OXFORD JAB GAME-CHANGER	2021-02-03	After	14	no
USA	WSJ	World News: U.K. Mutation Resists Vaccine	2021-02-03	After	14	no
CANADA	Globe and Mail	What you need to know about the latest medical guidance on mask-wearing	2021-02-04	After	14	no
INDIA	Hindu	ICMR survey finds one in five Indians have been exposed to coronavirus	2021-02-04	After	14	no
USA	WSJ	World News: U.K. Vaccine Drive Shows Promise	2021-02-04	After	14	no
CANADA	Star	Testing reveals spread of virus variants;More than 100 cases found in day's worth of samples, many tied to Barrie outbreak	2021-02-05	After	14	no
UK	Sun	Inside the mutant 'mind' of Covid-19;HOW NEW VIRUS STRAINS ARE DOWN TO ITS OWN EVOLUTIONARY FIGHT FOR LIFE	2021-02-05	After	14	yes
CANADA	Star	Eighty-one deaths later, outbreak declared over	2021-02-06	After	14	no
CANADA	Globe and Mail	How genome science guides province's pandemic response	2021-02-08	After	14	no
UK	Daily Mail	VACCINES MUST REACH EVERY CORNER OF SOCIETY	2021-02-08	After	14	no
USA	WSJ	Virus Likely to Stay After Crisis Fades	2021-02-08	After	14	no
CANADA	Star	Cancelling March break no easy decision;Students, staff need to recharge, but travel, gatherings are concerns	2021-02-09	After	14	no
UK	Sun	Don't let variants distract from facts: Vaccines save lives;EXPERTS SAY JAB IS OUR BEST SHOT	2021-02-09	After	14	yes
USA	NYT	As a Variant Outruns Vaccines, a Warning For the World Surfaces: [Foreign Desk]	2021-02-09	After	14	yes
UK	Daily Mail	THIS STAIN OF SHAME TARNISHES THE MET	2021-02-10	After	14	no
UK	Sun	Two new variants detected	2021-02-10	After	14	no
USA	NYT	Tighten Masks Or Double Up, C.D.C. Warns: [Correction]	2021-02-11	After	14	yes
NIGERIA	The Nation	Africa's COVID-19 deaths rose by 40 percent in January - WHO	2021-02-11	After	14	no
AUS	Age	CSL confident it can cover variants with its vaccine	2021-02-12	After	14	no
CANADA	Globe and Mail	We're sleepwalking into a brutal third wave;OPINION	2021-02-12	After	14	no
CANADA	Globe and Mail	MANITOBA COMMITS TO BUYING TWO MILLION DOSES OF PROSPECTIVE CANADIAN VACCINE	2021-02-12	After	14	no
CANADA	Globe and Mail	The 'me first' spirit of vaccine nationalism isn't just selfish. It's self-harm;OPINION	2021-02-13	After	14	no
CANADA	Star	B.1.1.7 variant cases growing quickly;More aggressive strain will become dominant in Ontario, experts warn	2021-02-13	After	14	no
UK	Sun	WHAT A LOAD OF STALLS;Profs' schools return clash Rate fall will 'open' classes	2021-02-14	After	14	no
UK	Sun	Do vaccine passports only work in fantasyland?;Planet Heather 3 PAGES OF HOLS WITH SCOTTISH SUN TRAVEL EDITOR HEATHER EXPERTS ARGUE FOR AND AGAINST JAB DOCUMENT	2021-02-14	After	14	no
USA	NYT	When Can We Have House Guests Again?: [Correction]	2021-02-14	After	14	no
USA	NYT	7 Virus Variants Found in U.S. Carrying the Same Mutation	2021-02-14	After	14	yes
AUS	Age	Survival plea over overseas students	2021-02-15	After	14	no
AUS	SMH	Experts split on source of outbreak	2021-02-15	After	14	no
CANADA	Globe and Mail	Canada's slow shift to domestic vaccine capacity;ANALYSIS	2021-02-15	After	14	no
CANADA	Star	Vaccinated? It's best to keep behaving like you're not;Families will have to navigate what it means when only one person has been immunized	2021-02-15	After	14	no
INDIA	TOI	A new Covid order is rising: All you need to know	2021-02-16	After	14	no
UK	Daily Mail	STAY AT HOME' MESSAGE WILL BE SHOWN THE DOOR	2021-02-16	After	14	no
CANADA	Globe and Mail	Ontario's new virus math doesn't add up	2021-02-17	After	14	no
CANADA	Star	Drop in cases is only part of the issue;Experts concerned over increasing number of variant-linked positives	2021-02-17	After	14	no
INDIA	Hindu	Coronavirus | Four cases of South Africa variant of virus found	2021-02-17	After	14	no
USA	WSJ	World News: Variants Outpace EU's Vaccine Rollout	2021-02-17	After	14	no
USA	NYT	Coronavirus Update: [Foreign Desk]	2021-02-18	After	14	no
UK	Sun	Minister Foley's failing science in her school test	2021-02-19	After	14	no
USA	WSJ	We'll Have Herd Immunity by April	2021-02-19	After	14	no
INDIA	TOI	Signs Of A Win, But Delhi Can't Let Its Guard Down	2021-02-20	After	14	no
INDIA	TOI	India host to 7,569 corona mutants: Study	2021-02-21	After	14	no
INDIA	TOI	Indore: 105 samples sent to NCDC for genome sequencing	2021-02-22	After	14	no
INDIA	TOI	Odisha govt rolls up sleeves to prevent Covid's return	2021-02-22	After	14	no
UK	Sun	SPRING BREAK;PM TO REVEAL 'CAUTIOUS' ROAD BACK TO FREEDOM lSchools begin March unlock lOutdoor pubs by mid-April	2021-02-22	After	14	no
USA	NYT	Virus Variant Spread Prompts E.U. Members to Rethink Open Borders: [Correction]	2021-02-22	After	14	no
AUS	Age	Hopes for overseas travel this year	2021-02-23	After	14	no
INDIA	TOI	Can we avoid another coronavirus pandemic?	2021-02-23	After	14	no
USA	NYT	No Lengthy Testing for Vaccines for Variants: [Foreign Desk]	2021-02-23	After	14	no
USA	WSJ	U.K. Vaccine Data Offer Upbeat Signs	2021-02-23	After	14	no
INDIA	Hindu	Number of people adhering to COVID-19 norms has fallen drastically, says survey	2021-02-24	After	14	no
NIGERIA	Punch	COVID-19 variant: Experts seek mass testing to prevent spread	2021-02-24	After	14	no
USA	WSJ	U.S. News: Moderna Rolls Out Doses to Fight New Strain	2021-02-25	After	14	yes
CANADA	Globe and Mail	Ontario officials mull lockdown for Thunder Bay as cases rise rapidly	2021-02-26	After	14	no
CANADA	Star	Moderna's vaccine deals top $18 billion;Medical boss departing as CEO says its mRNA work 'just the beginning'	2021-02-26	After	14	no
USA	NYT	Coronavirus Update: [Foreign Desk]	2021-02-26	After	14	no
CANADA	Globe and Mail	Health Canada clears AstraZeneca vaccine	2021-02-27	After	14	no
CANADA	Globe and Mail	On vaccine coverage, we're working to get the dosage right;OPINION	2021-02-27	After	14	no
CANADA	Star	What to know about Canada's new vaccine;AstraZeneca shot the third to be made available in Canada	2021-02-28	After	14	no
NIGERIA	The Nation	Sanofi, GSK start new phase 2 study of COVID-19 vaccine candidate	2021-03-01	After	15	no
UK	Daily Mail	SINGLE JAB TO BEAT MUTANTS	2021-03-03	After	15	no
USA	WSJ	World News: Brazil Virus Variant Overwhelms Region --- Aggressive new strain infects younger people, raises deaths, doctors and researchers warn	2021-03-03	After	15	no
CANADA	Star	Ontario eyes delayed-dose vaccinations after green light from national panel;Extending time between shots could 'provide more protection to more people,' province says	2021-03-04	After	15	no
CANADA	Star	Ottawa says boosters will be approved more easily;Health Canada will rely on blood tests to study antibody development	2021-03-05	After	15	yes
INDIA	Hindu	Coronavirus | Half of Hyderabad, Secunderabad's population have antibodies, says study	2021-03-05	After	15	no
UK	Daily Mail	FAST-TRACKJABS TO BEAT THE DANGER OFVIRUS MUTATIONS	2021-03-05	After	15	yes
UK	Sun	PFIZER IS GOOD VS MUTANT	2021-03-10	After	15	no
USA	WSJ	Coronavirus Variants Are Spreading Locally	2021-03-11	After	15	no
GUYANA	Guyana Chronicle	‘Deep South’ Rupununi COVID-free	2021-03-11	After	15	no
USA	NYT	Weak Immune Systems Can Turbocharge Variants: [Foreign Desk]	2021-03-16	After	15	yes
UK	Daily Mail	KILLER FROM MANILA? NEW PHILIPPINES STRAIN IN UK	2021-03-17	After	15	yes
CANADA	Star	COVID closes 10 Dufferin-Peel schools;St. Sofia outbreak infects at least 15 students, staff, with three in hospital	2021-03-19	After	15	no
USA	WSJ	U.S. News: J&amp;amp;J Aims To Modify Doses for Variants	2021-03-19	After	15	yes
GUYANA	Guyana Chronicle	Beating COVID	2021-03-20	After	15	no
CANADA	Star	Vaccinations working among those 80 and up;Tam touts success among older population as cases rise for younger groups	2021-03-22	After	15	no
UK	Daily Mail	NEW TEST SPOTS VARIANTS FASTER	2021-03-22	After	15	no
INDIA	TOI	Not variants, but flouting of mask rule tied to rise in cases'	2021-03-24	After	15	no
INDIA	Hindu	COVID-19: Genome sequencing by INSACOG shows variants of concern and a novel variant in India: Health Ministry	2021-03-24	After	15	no
USA	WSJ	REVIEW --- Herd Immunity Won't Save Us -- But We Can Still Beat Covid-19 --- A national system of proactive surveillance, innovative contact tracing and just-in-time vaccination can get the pandemic under control -- and prepare us for the next one.	2021-03-27	After	15	no
INDIA	Hindu	Coronavirus | First COVID-19 re-infection case in Rajasthan treated successfully	2021-03-28	After	15	no
CANADA	Globe and Mail	B.C. waited too long to respond to the rising third wave of COVID-19;OPINION	2021-03-31	After	15	no
INDIA	TOI	Second wave of new Covid cases in Bengal may peak in May-June	2021-03-31	After	15	no
INDIA	TOI	Coronavirus reinfection: Senior citizens more likely to get reinfected, according to a new study	2021-04-01	After	16	no
AUS	Age	Dumb and dumber on vaccines	2021-04-02	After	16	no
INDIA	TOI	UNICEF & WHO warn of further rise in cases if norms are flouted	2021-04-02	After	16	no
INDIA	Hindu	COVID-19 second wave leaves doctors in Kerala baffled	2021-04-02	After	16	no
CANADA	Globe and Mail	Why the EU won't see the pandemic end any time soon;OPINION	2021-04-03	After	16	no
USA	WSJ	Fourth Wave Targets the Young and Restless	2021-04-03	After	16	yes
USA	WSJ	World News: U.K., More Upbeat Than EU on Covid, to Ease Curbs	2021-04-06	After	16	no
UK	Sun	If foreign tourists are flying in, why can't we fly out?	2021-04-07	After	16	no
CANADA	Globe and Mail	PLAYING LIFE, ONE PEG AT A TIME;FIRST PERSON	2021-04-08	After	16	no
USA	WSJ	U.S. News: U.K. Variant of Coronavirus Now Dominant Strain in U.S. --- Speedier vaccinations urged to combat rise of more-contagious mutation circulating	2021-04-08	After	16	no
INDIA	TOI	Exclusive Interview! Aanchal Shah on being a medical student: I am working as a frontline warrior	2021-04-11	After	16	no
GUYANA	Kaieteur	Redouble mask wearing efforts – Emergency Medicine Specialist urges	2021-04-13	After	16	no
INDIA	TOI	12.7 lakh fully vaccinated in Uttar Pradesh	2021-04-14	After	16	no
CANADA	Star	This may be the future of fighting COVID;Seattle man is getting third dose of vaccine in Moderna's booster trial	2021-04-16	After	16	no
INDIA	Hindu	Coronavirus | SII CEO appeals to U.S. seeking lifting of embargo on export of raw material for vaccine	2021-04-16	After	16	no
USA	WSJ	Global Variants Fuel Surge In Cases	2021-04-16	After	16	no
UK	Daily Mail	INFECTIONS AT LOWEST LEVEL SINCE AUTUMN	2021-04-17	After	16	no
GUYANA	Kaieteur	Coronavirus: These are our endgame options; our behaviour will determine where we end up	2021-04-18	After	16	yes
INDIA	TOI	UP: RTPCR negative, but symptomatic to be treated as presumptive Covid cases	2021-04-19	After	16	no
INDIA	TOI	We must be two steps ahead of virus, but we end up chasing it'	2021-04-20	After	16	no
UK	Sun	DOUBLE BUBBLE;NEW MILESTONE IN THE B NE IN THE BATTLE AGAINST COVID l1 in 5 adults have 2nd jab lAutumn booster plan	2021-04-20	After	16	no
USA	WSJ	Poorest Nations Fall Behind As Vaccine Efforts Stagnate	2021-04-20	After	16	no
INDIA	TOI	Chhattisgarh: 70% vaccination, herd immunity will flatten the curve, says doctors	2021-04-21	After	16	no
AUS	Age	No Pfizer for over-50s as India flights cut	2021-04-23	After	16	no
INDIA	TOI	Is Indian Covid variant behind second wave that started from Vidarbha?	2021-04-23	After	16	no
INDIA	Hindu	IMA calls for curfew on counting day	2021-04-23	After	16	no
CANADA	Star	Vaccines must be available for whole world	2021-04-24	After	16	no
CANADA	Star	Some restrictions could be lifted in July;Modelling projects crisis could ease in summer if vaccination rate hits 75%	2021-04-24	After	16	no
INDIA	TOI	First obligation is to Americans, says US on India's request for vaccine raw materials	2021-04-24	After	16	no
USA	NYT	Pfizer and Moderna Offer Defense Against Variant In New York, Studies Say: [Foreign Desk]	2021-04-24	After	16	no
INDIA	TOI	Melghat sees spurt in deaths, many suspected to be due to Covid	2021-04-25	After	16	no
INDIA	Hindu	Breakthrough infections emerge new concern	2021-04-25	After	16	no
CANADA	Star	N.L. doctors, nurses joining T.O. hospitals;Red tape to work in different provinces normally takes months	2021-04-28	After	16	no
INDIA	TOI	Presence of double mutant virus found in state: CM	2021-04-28	After	16	no
INDIA	Hindu	Coronavirus | Reducing movement, activity needed to break chain of transmission, says Lancet Commission India task force head	2021-04-28	After	16	no
INDIA	TOI	Need extreme caution against mutant virus: CM	2021-04-29	After	16	no
INDIA	TOI	Madhya Pradesh: Corona curfew to be enforced strictly till May 7, says chief minister	2021-04-30	After	16	no
INDIA	TOI	Kerala: Daily cases cross 35,000 mark, test positivity rate at 25.3%	2021-04-30	After	16	no
USA	WSJ	East Is East: India's Covid Crisis Could Reach You Too	2021-04-30	After	16	no
INDIA	TOI	Health officials expect surge in Bilaspur, Korba & Raigarh	2021-05-01	After	17	no
USA	WSJ	What India's Viral Misery Is Telling Us	2021-05-01	After	17	no
INDIA	TOI	April cruellest month for Gujarat in its Covid war	2021-05-02	After	17	no
GUYANA	Guyana Chronicle	India’s COVID-19 battle should be a lesson for everyone	2021-05-02	After	17	no
USA	WSJ	U.S. News: Resilient Strain Can Be Curbed --- Vaccines in U.S. work well against the U.K. variant even though it is highly contagious	2021-05-03	After	17	no
INDIA	Hindu	Fresh supplies of vaccine to reach Kerala today	2021-05-04	After	17	no
INDIA	TOI	Struggling to get O2 cylinders', Air India pilots refuse to fly unless vaccinated for Covid 'urgently'	2021-05-05	After	17	no
INDIA	TOI	Air India to vaccinate all staff, including flying crew, by May end	2021-05-05	After	17	no
INDIA	TOI	Let's pick up the pieces & start afresh	2021-05-05	After	17	no
USA	WSJ	American Health Depends on Exporting Covid Vaccines	2021-05-05	After	17	no
AUS	Age	CSL forced to pay more for plasma in US	2021-05-06	After	17	no
CANADA	Globe and Mail	BRITAIN BETS BIG ON ASTRAZENECA;PANDEMIC	2021-05-06	After	17	no
INDIA	TOI	Expect second wave to fall as fast as it went up	2021-05-07	After	17	no
USA	NYT	Pfizer Shot Works Well On Variants, Studies Find: [Foreign Desk]	2021-05-07	After	17	no
USA	WSJ	Global Virus Deaths Set to Top 2020	2021-05-07	After	17	no
INDIA	TOI	India approves anti-Covid cocktail given to Trump: What you should know	2021-05-09	After	17	no
USA	NYT	Virologists Draw Out Solid Pandemic Data From the Wastewater Drain: [Foreign Desk]	2021-05-09	After	17	no
AUS	SMH	The world is awash with money	2021-05-11	After	17	no
USA	NYT	To Weaken a Mortal Threat, Do One Simple Thing: [Science Desk]	2021-05-11	After	17	no
USA	WSJ	Children 12 to 15 Are Cleared By FDA to Get Pfizer Vaccine	2021-05-11	After	17	no
AUS	Age	Quarantine rethink call after latest virus escape	2021-05-12	After	17	yes
USA	WSJ	World News: India Struggles to Contain Variants --- Surge puts pressure on labs that do genomic sequencing needed to track Covid mutations	2021-05-12	After	17	yes
NIGERIA	Punch	COVID-19: Ruthless South Africa variant hits Ghana, Togo, 21 others, says WHO	2021-05-12	After	17	no
USA	NYT	Covid Spike Alarms World's Most Vaccinated Country: [Foreign Desk]	2021-05-13	After	17	no
INDIA	TOI	Centre asks states to re-open poultry shops; animal welfare groups insist on not lowering guard	2021-05-14	After	17	no
INDIA	TOI	How shortage of vaccines for 18-44 group will hurt children	2021-05-15	After	17	no
CANADA	Star	Bred for fur, they could be virus spreaders;In B.C., doctors are pushing the government to shut down mink farms over outbreak risks	2021-05-16	After	17	no
INDIA	TOI	US, wealthy west failing India and developing countries, says NYT	2021-05-17	After	17	no
INDIA	Hindu	COVID-19 response over next 6-18 months critical, says Soumya Swaminathan	2021-05-17	After	17	yes
AUS	Age	Drug a 'heat-seeking missile' to target COVID-19	2021-05-18	After	17	no
USA	NYT	Britain Savors End of Lockdown, But Variant Emerges as a Threat: [Foreign Desk]	2021-05-18	After	17	no
USA	WSJ	U.S. News: Covid Patients in Hospital Are Younger	2021-05-18	After	17	no
INDIA	TOI	600 cases of B.1.617 in US; India, others trace mutation	2021-05-19	After	17	no
USA	NYT	E.U. to Drop Travel Ban For Vaccinated Visitors As Vacation Season Starts: [Foreign Desk]	2021-05-20	After	17	no
INDIA	TOI	CM Concerned About Kids, Centre Diplomatic Image'	2021-05-21	After	17	no
USA	WSJ	World News: Health Authorities Work on Vaccine-Booster Programs	2021-05-21	After	17	no
AUS	Age	Open Season	2021-05-22	After	17	yes
AUS	SMH	The New Normal	2021-05-22	After	17	yes
CANADA	Globe and Mail	RACISM AND COVID-19 ARE INTERLOCKING PANDEMICS WREAKING HAVOC ON RACIALIZED COMMUNITIES ACROSS THE CONTINENT;OPINION	2021-05-22	After	17	no
INDIA	TOI	Why you shouldn't stop wearing a mask even after 2 vaccine doses	2021-05-25	After	17	no
USA	NYT	Taiwan Was a COVID-19 Haven for Performers. Then Cases Flared.	2021-05-25	After	17	no
CANADA	Globe and Mail	Provinces look at moving up second doses	2021-05-26	After	17	no
INDIA	TOI	Punjab has enough black fungus medicines'	2021-05-26	After	17	no
INDIA	Hindu	Covid- 19 | Only way to decrease variants of COVID-19 is by increasing vaccination, says Dr Gagandeep Kang	2021-05-26	After	17	no
INDIA	Hindu	Coronavirus | 20 given wrong second COVID-19 vaccine dose in U.P. village	2021-05-27	After	17	no
UK	Daily Mail	FRANCE NOW OFF-LIMITS'	2021-05-27	After	17	yes
USA	NYT	Studies Show Immunity to Virus May Persist for Years: [Foreign Desk]	2021-05-27	After	17	no
INDIA	Hindu	Aggressive vaccination key to combating COVID waves: doctors	2021-05-30	After	17	no
INDIA	TOI	Vaccines effective for at least 1 year, says Karnataka virologist	2021-05-31	After	17	no
INDIA	TOI	Covid-appropriate behaviour, enhanced vaccine drive will delay or diminish impact of 3rd wave'	2021-05-31	After	17	no
INDIA	Hindu	Coronavirus | 'India variant' to be called 'Delta' in new WHO system	2021-06-01	After	18	no
INDIA	Hindu	Only one of three strains of B.1.617 COVID-19 variant first detected in India now a "variant of concern," says WHO	2021-06-02	After	18	yes
USA	NYT	Spared for Months, Vietnam Faces a Wave of New Infections	2021-06-02	After	18	no
CANADA	Globe and Mail	Canada reluctant to join international vaccine-sharing campaign	2021-06-03	After	18	no
INDIA	TOI	Mixing vaccines can help end second dose crunch	2021-06-04	After	18	no
UK	Daily Mail	NEPAL VARIANT' THREAT TO OUR HOLIDAYS	2021-06-04	After	18	no
UK	Daily Mail	AS RELEGATION TO AMBER LIST PROMPTS DIPLOMATIC STORM...	2021-06-04	After	18	no
INDIA	TOI	State plans genome sequencing lab	2021-06-05	After	18	yes
INDIA	Hindu	Delta variant led to most post-vaccine infections in Delhi	2021-06-05	After	18	no
USA	NYT	As U.S. Ditches Masks, Europe Stays Cautious: [Foreign Desk]	2021-06-06	After	18	yes
INDIA	Hindu	More transmissible COVID-19 variant possible in third wave of pandemic, says Kerala Health Minister Veena George	2021-06-07	After	18	no
CANADA	Globe and Mail	Global vaccination must be the top priority at the G7 meeting;OPINION	2021-06-08	After	18	no
AUS	Age	Vaccines the 'pillar' for reopening the country	2021-06-09	After	18	no
INDIA	TOI	Covid round-up: Centre orders 44cr vaccine doses, AIIMS chief says no imminent concern for children, and more	2021-06-09	After	18	no
INDIA	TOI	Why single-dose Covishield is not a bad idea	2021-06-09	After	18	no
INDIA	Hindu	Kerala banks on genomic surveillance data	2021-06-09	After	18	no
USA	NYT	China Returns to Its Strict COVID Limits to Fight a New Outbreak	2021-06-09	After	18	no
CANADA	Globe and Mail	Ontario faces calls to shorten interval between AstraZeneca doses	2021-06-10	After	18	no
UK	Daily Mail	BRITAIN TO GIVE 100M JABS TO REST OF WORLD	2021-06-10	After	18	no
USA	WSJ	U.S. News: Variant From India Spreading Quickly Around World	2021-06-10	After	18	no
INDIA	TOI	Covid: Consortium of 4 cities funded for enhanced genome surveillance	2021-06-11	After	18	no
INDIA	TOI	Coronavirus: Can the COVID-19 vaccine ensure protection against the new variant?	2021-06-14	After	18	no
INDIA	TOI	Mass gatherings, virulent variants create perfect storm for virus to spread'	2021-06-14	After	18	no
UK	Sun	N saa no o one is fe until well are, it's t over yet;THE IRISH SUN BACKS UNICEF'S CAMPAIGN TO VACCINATE WORLD Says UNICEF IRELAND'S PETER POWER	2021-06-15	After	18	no
INDIA	TOI	DRDO's 2-DG shields from all variants: CCMB	2021-06-16	After	18	no
INDIA	TOI	Around 20,000 kids below 10 vulnerable in case of 3rd wave	2021-06-16	After	18	no
INDIA	Hindu	Morning Digest: Twitter appoints interim Chief Compliance Officer for India; AY.1 not a variant of concern, says Centre, and more	2021-06-16	After	18	no
CANADA	Star	Virus 'upped its game' with Delta variant, doctor warns	2021-06-17	After	18	yes
INDIA	TOI	Ocugen ropes in Jubilant Pharmova arm for making Covaxin for US, Canada	2021-06-17	After	18	no
INDIA	Hindu	State opening up cautiously	2021-06-18	After	18	no
CANADA	Star	Ford pushes to open salons, but Williams nails it	2021-06-19	After	18	yes
INDIA	TOI	Urge PM Modi to reduce gap between 2 doses, Ravikumar tells Stalin	2021-06-19	After	18	no
INDIA	TOI	Single-dose cocktail helping patients recover faster: Docs	2021-06-20	After	18	no
UK	Daily Mail	CHEAPER TESTS WOULD CUT NEW VARIANT RISK'	2021-06-21	After	18	no
USA	NYT	Covid-19 Renews Debate About Risks of Lab Work: [Science Desk]	2021-06-22	After	18	yes
USA	NYT	COVID Surge in Africa Raises Fears of a Calamity Like India’s	2021-06-22	After	18	no
INDIA	Hindu	No sufficient data to be alarmed about Delta Plus variant: Maharashtra COVID-19 task force member	2021-06-23	After	18	no
UK	Sun	3m more jabs to be grabbed	2021-06-23	After	18	yes
AUS	SMH	Brash budget assumptions go viral	2021-06-24	After	18	no
INDIA	TOI	Delta-plus variant found in Mysuru patient	2021-06-24	After	18	no
INDIA	Hindu	Manipur 'fully prepared' for third wave of COVID-19, says CM	2021-06-24	After	18	no
INDIA	TOI	Karnataka: Room for more relaxation, but be cautious, say experts	2021-06-25	After	18	no
INDIA	Hindu	Coronavirus | 50 cases of Delta-plus variant reported in country	2021-06-25	After	18	no
UK	Sun	Feeling a strain	2021-06-25	After	18	no
USA	WSJ	The CDC's Eternal Emergency	2021-06-25	After	18	no
AUS	SMH	A city shackled	2021-06-26	After	18	no
INDIA	Hindu	Coronavirus | Centre raises alert on delta plus variant	2021-06-26	After	18	no
INDIA	Hindu	Third COVID-19 wave unlikely to be as severe as second: ICMR	2021-06-26	After	18	no
INDIA	TOI	13% of India's Covid variants of concern detected in region	2021-06-27	After	18	no
INDIA	TOI	Yogi: Genome sequencing to trace Delta+	2021-06-27	After	18	no
GUYANA	Kaieteur	Coronavirus: The scary Delta variant is rapidly moving towards us	2021-06-27	After	18	no
AUS	SMH	View from lockdown is brighter	2021-06-28	After	18	no
CANADA	Star	If they refuse vaccines, you can refuse them	2021-06-28	After	18	no
INDIA	TOI	New Variant May Breach Vax Shield'	2021-06-28	After	18	no
INDIA	TOI	Immediate task is 3rd wave. It's always good to be overprepared'	2021-06-28	After	18	yes
AUS	Age	Education and unity key to virus exit strategy	2021-06-29	After	18	no
AUS	SMH	Singapore's road map to normal life	2021-06-29	After	18	no
INDIA	TOI	Keep emerging variants under watch: Experts	2021-06-29	After	18	no
USA	WSJ	World News: Variant Surges Across Vulnerable Africa --- Record cases lead to shortages of ICU beds and oxygen, as nations reimpose lockdowns	2021-06-29	After	18	no
CANADA	Globe and Mail	Uneven global recovery puts pressure on emerging markets	2021-06-30	After	18	no
CANADA	Star	More restrictions (and our hair) finally get the chop	2021-06-30	After	18	no
INDIA	TOI	Cov patients with travel history to be treated at govt centres	2021-06-30	After	18	no
INDIA	TOI	Uttar Pradesh: 57 districts have less than 50 active cases	2021-06-30	After	18	no
AUS	SMH	Seven days that shook NSW from smugness	2021-07-01	After	19	no
INDIA	TOI	In Punjab, Covid restrictions extended till July 10	2021-07-01	After	19	no
USA	NYT	Arrival of Delta Variant Could End Australia's Pursuit of 'Covid Zero': [Foreign Desk]	2021-07-03	After	19	no
INDIA	Hindu	Coronavirus | Third wave may see half the cases recorded during second surge, says govt. panel scientist	2021-07-04	After	19	no
GUYANA	Kaieteur	Coronavirus: Our behaviour patterns are fuelling super mutants	2021-07-04	After	19	yes
NIGERIA	Punch	Virologists advocate adherence to COVID safety protocols as Delta ‘variant of concern’ spreads	2021-07-04	After	19	no
USA	NYT	An Independence Day Event to Celebrate Progress on the Pandemic: [Correction]	2021-07-05	After	19	no
AUS	SMH	Pandemic road map on right path	2021-07-06	After	19	no
UK	Sun	SHOULD WE DITCH MASKS AFTER JULY 19?	2021-07-06	After	19	no
USA	WSJ	Health &amp;amp; Wellness: Safe-Summer Planning for Kids --- What parents with unvaccinated children should consider as vacation season gets under way	2021-07-06	After	19	yes
AUS	SMH	Natural immunity no way to beat virus variants	2021-07-07	After	19	no
UK	Daily Mail	WE WON'T GET BACK TO NORMAL TILL NEXT SPRING	2021-07-07	After	19	no
INDIA	TOI	Genome lab to help analyse Covid variants	2021-07-09	After	19	no
USA	NYT	Pfizer and BioNTech Plan to Test a Vaccine Against the Delta Variant: [Live Blog Post]	2021-07-09	After	19	no
USA	WSJ	Pfizer Will Ask U.S. to Clear Booster for Covid-19 Variants	2021-07-09	After	19	no
CANADA	Globe and Mail	Canada needs to fix the management of its borders now to prevent a fourth wave;ANALYSIS	2021-07-10	After	19	no
CANADA	Star	You can watch the life return to the city';If cases continue to fall and vaccine rates rise, August could be 'normal'	2021-07-10	After	19	no
INDIA	TOI	Tope: Study on breakthrough infections on the anvil	2021-07-11	After	19	no
NIGERIA	Punch	Delta variant: NMA, virologists warn Nigerians, experts probe virus strain	2021-07-11	After	19	no
INDIA	TOI	Two Lucknow teens test positive for Kappa variant	2021-07-12	After	19	no
INDIA	Hindu	Coronavirus | Railways focus on paediatric healthcare facilities ahead of third wave	2021-07-12	After	19	no
USA	NYT	‘Freedom Day’ Coming to England, Ready or Not	2021-07-12	After	19	no
AUS	Age	What difference does it make with second AZ jab?	2021-07-13	After	19	no
AUS	Age	Call for national approach to Delta	2021-07-13	After	19	no
AUS	SMH	National rules 'desperately needed' to stop Delta: experts	2021-07-13	After	19	no
INDIA	TOI	Pocket outbreaks' of Delta as 11 more samples test positive in Ngp	2021-07-13	After	19	yes
INDIA	Hindu	Matter of concern to see big crowds without masks in hill stations, markets: PM Modi	2021-07-13	After	19	no
USA	NYT	Weighing Booster Shots for the Immunocompromised: [Science Desk]	2021-07-13	After	19	no
AUS	Age	How will variants change our COVID-19 response?	2021-07-15	After	19	no
INDIA	Hindu	Rise in COVID-19 cases in Kerala, Maharashtra cause of grave worry: PM	2021-07-16	After	19	no
USA	WSJ	OPEC Ties Higher Oil Demand to Prices	2021-07-16	After	19	no
UK	Daily Mail	AS FIRMS FROM OIL GIANTS TO MINERS BRING BACK DIVIDENDS, THERE'S AN...	2021-07-17	After	19	no
USA	NYT	Where Few Got Covid Vaccine, Many Get Sick: [National Desk]	2021-07-18	After	19	no
AUS	Age	Freedom day'? I call it a gamble	2021-07-19	After	19	no
AUS	SMH	Freedom day? No, reckless gamble	2021-07-19	After	19	no
INDIA	Hindu	A third COVID-19 wave can make its appearance felt as early as late August: ICMR epidemiologist Samiran Panda	2021-07-19	After	19	no
GUYANA	Kaieteur	Health Minister believes COVID-19 variants are here	2021-07-19	After	19	no
GUYANA	Guyana Chronicle	More deaths, hospitalisations linked to COVID-19 variants	2021-07-19	After	19	no
USA	WSJ	World News: England Sheds Most Covid Curbs	2021-07-20	After	19	no
AUS	SMH	Former greats slam US star as 'selfish' for refusing vaccine	2021-07-22	After	19	no
USA	NYT	Battle-Weary Nations Learn to Live With Covid: [Correction]	2021-07-22	After	19	no
CANADA	Star	Seneca College is doing its part to stop spread of COVID-19	2021-07-25	After	19	no
INDIA	TOI	No proof kids will be hit hardest in case of a third wave: Centre	2021-07-25	After	19	no
NIGERIA	Punch	Delta variant: NMA, virologists warn Nigerians, experts probe virus strain	2021-07-25	After	19	no
AUS	Age	Rapid testing crucial for speedy virus	2021-07-26	After	19	no
CANADA	Globe and Mail	Closer to the edge': The Delta variant and a lack of vaccines have Indonesia struggling with a COVID-19 catastrophe	2021-07-28	After	19	no
USA	NYT	Delta Variant Is Unlikely to Kill Recovery but May Wound It: [Business/Financial Desk]	2021-07-28	After	19	no
USA	WSJ	U.S. News: Parent Fears Deter Some Vaccinations	2021-07-28	After	19	no
AUS	Age	Scientists split over Sydney's lockdown	2021-07-29	After	19	no
INDIA	TOI	Ahead of third wave, experts split over efficacy of Covid vaccines	2021-07-29	After	19	no
USA	NYT	Variant Has New Yorkers 'Scared All Over Again': [National Desk]	2021-07-29	After	19	no
AUS	SMH	Mythology behind COVID anger	2021-07-30	After	19	yes
INDIA	TOI	New Covid-19 variants take shape in bodies of patients, finds study	2021-07-30	After	19	no
UK	Sun	The kids are not alright while the virus still rages;@Damien LaneDsun Cap'an Crunch, Camp'n Crunch. Munch aind muench and munnch and munch LanDeamien.Lane@the-sun.ie	2021-07-30	After	19	no
USA	NYT	This Wave's Geography Is Political: [Op-Ed]	2021-07-30	After	19	no
CANADA	Star	Passports a key tool in fight against fourth wave	2021-07-31	After	19	no
INDIA	TOI	Worry for Odisha as corona cases stay above 1,500	2021-08-01	After	20	no
UK	Sun	Australia & China's Delta fear	2021-08-01	After	20	yes
CANADA	Globe and Mail	Booster shots in Canada are unlikely - for now;OPINION	2021-08-02	After	20	yes
GUYANA	Guyana Chronicle	‘No price for the lives of Guyanese’	2021-08-02	After	20	no
UK	Daily Mail	THE SUPER UNIVERSAL' VACCINE TO FIGHT OFF ANY CORONAVIRUS	2021-08-03	After	20	no
NIGERIA	Punch	Allow private sector to procure vaccine, PSN tells FG	2021-08-03	After	20	no
CANADA	Star	Living with the threat of the Delta variant;Man barely survived his first bout with COVID-19. He doesn't want a second	2021-08-04	After	20	no
USA	NYT	World’s Coronavirus Infection Total Passes Staggering Figure: 200 Million	2021-08-04	After	20	no
USA	NYT	Biden Administration Planning to Require Foreign Travelers to Be Vaccinated	2021-08-04	After	20	no
INDIA	Hindu	Efforts to track emerging COVID-19 variants shrink	2021-08-05	After	20	no
UK	Sun	SPAIN REIGNS AGAIN;E BINNED FOR TWO-JABBERS MUDDLE AS QUARANTINE (AND MAINLY WITHOUT PAIN) lConfusion over Covid tests s lBut great news for France	2021-08-05	After	20	no
USA	NYT	Dos and Don'ts For the Inoculated: [National Desk]	2021-08-05	After	20	no
USA	WSJ	World News: WHO Seeks Booster Delays For Covid-19 --- Shortfalls in vaccine supplies are cited in call for moratorium until end of September	2021-08-05	After	20	no
NIGERIA	The Nation	How to eradicate viral hepatitis before 2030, by PSN	2021-08-05	After	20	no
INDIA	TOI	Stay alert, still not clear if antibodies protect against new variants: Docs	2021-08-06	After	20	no
AUS	Age	Warning lockdowns to be more frequent	2021-08-07	After	20	no
USA	NYT	The Covid Endgame Continues to Elude Us: [Op-Ed]	2021-08-07	After	20	yes
INDIA	TOI	Karnataka sees 12,000 breakthrough infections, but officials say it's no cause for alarm	2021-08-08	After	20	no
USA	NYT	They Persevered, and Folded: [Style Desk]	2021-08-08	After	20	no
USA	NYT	Virus Misinformation Spikes as Delta Cases Surge	2021-08-10	After	20	no
AUS	Age	Lost months exact high human and financial cost	2021-08-11	After	20	no
CANADA	Globe and Mail	Vaccines should be prioritized for poorer countries, not booster shots at home, experts say	2021-08-11	After	20	no
INDIA	TOI	Avoid celebrations, cautions govt	2021-08-11	After	20	no
AUS	SMH	Delta outbreak hits China's already shaky economy;Comment	2021-08-12	After	20	no
INDIA	TOI	Vaccine works against Delta, booster may not be needed	2021-08-12	After	20	yes
UK	Daily Mail	1 IN 9 FIRST-WAVE COVID PATIENTS GOT IT IN HOSPITAL	2021-08-13	After	20	no
GUYANA	Guyana Chronicle	Politicisation of vaccines	2021-08-14	After	20	no
NIGERIA	Punch	Mutations won’t affect efficacy of vaccine, says virologist	2021-08-15	After	20	no
CANADA	Star	Double-vaxxed singles hooking up again;But fears of a fourth wave are keeping some of them on the dating sidelines	2021-08-16	After	20	no
CANADA	Globe and Mail	Ontario to require vaccine clinics in schools	2021-08-17	After	20	no
CANADA	Star	Stay prepared' against COVID-19, Ford urges;Advice comes ahead of new vaccine mandate for doctors, hospital workers	2021-08-17	After	20	no
INDIA	TOI	Three sub-lineages of Delta-plus in circulation in Maharashtra	2021-08-17	After	20	no
USA	NYT	As Delta Surges, a Realization That Covid Isn't Going Away: [National Desk]	2021-08-17	After	20	no
USA	NYT	U.S. to Recommend Booster Shots For Most Americans After 8 Months: [National Desk]	2021-08-18	After	20	no
CANADA	Globe and Mail	What does the fourth wave mean for kids heading back to school?	2021-08-19	After	20	no
INDIA	Hindu	Need to accelerate pace of vaccination in districts with low seroprevalence : NIE experts	2021-08-19	After	20	no
INDIA	TOI	Pfizer losing efficacy faster against Delta variant: Study	2021-08-20	After	20	no
CANADA	Globe and Mail	My decades-old 'vaccine passport' tells the story of disease in our time;OPINION	2021-08-21	After	20	no
INDIA	TOI	India approves first vaccine for kids; world's first Covid-19 vaccine using DNA tech	2021-08-21	After	20	no
INDIA	Hindu	Why Karnataka's second wave is dragging on for long	2021-08-21	After	20	no
GUYANA	Kaieteur	Coronavirus: Vaccinated or not, this isn’t the time for us to drop our guard	2021-08-22	After	20	no
USA	NYT	Science of Virus Keeps Evolving And Frustrating: [National Desk]	2021-08-23	After	20	yes
UK	Daily Mail	NOW THAT'S A BOOSTER: UK NABS EXTRA 35M PFIZER JABS	2021-08-24	After	20	no
INDIA	Hindu	Health dept. checklist to support school reopening	2021-08-25	After	20	no
INDIA	TOI	Karnataka: Delta plus may not drive third Covid wave, say experts	2021-08-26	After	20	no
INDIA	TOI	Karnataka mulls quarantine for travellers from Kerala	2021-08-26	After	20	no
INDIA	Hindu	Delta variant sub-lineage AY.12 found in India	2021-08-26	After	20	no
AUS	Age	Parents, don't panic about Delta	2021-08-27	After	20	no
INDIA	TOI	Now, all Covid +ves to be in institutional isolation	2021-08-28	After	20	no
INDIA	Hindu	India unlikely to witness a surge in cases in September	2021-08-29	After	20	no
GUYANA	Guyana Chronicle	Immunity and its boosters	2021-08-29	After	20	no
CANADA	Star	Passport announcement coming this week;Ontario still waiting for proof-of-vaccination certificate for Canada	2021-08-31	After	20	no
INDIA	TOI	Third wave likely to be less severe, says ICMR	2021-08-31	After	20	no
INDIA	Hindu	State preparing to deal with possible third wave	2021-08-31	After	20	no
UK	Sun	Why giving no booster jabs could become a terrible mistake;PROF'S VACCINE WARNING TO GOVT	2021-08-31	After	20	no
