# Supplementary material for: Use of the word “evolution” in the time of a global pandemic
Source: Frontiers journal article supplement (doi:10.3389/fcomm.2024.1427596), 2024-07-29
Supplement: Table_2.XLSX [file Table_2.XLSX]

## Sheet: phrases 7.14.23
Country	Newspaper	Title	Date	Pandemic Stage	Phrase	Uses Evolve	Word or Phrase
USA	WSJ	World News: Coronaviruses Pose a Growing Global Threat	2020-01-11	Before	"The natural home of the coronavirus is believed to be in bats. But the virus jumps easily from one host to another, evolving as it moves."	yes	evolve
INDIA	TOI	Mysterious coronavirus may spread from human to human, says WHO	2020-01-21	Before	One expert, Gao Fu, said the coronavirus was new and changing every day.	no	change
INDIA	TOI	Two US firms in race to develop vaccine	2020-01-26	Before	They can evolve into strains not previously identified in humans.	yes	evolve
NIGERIA	The Nation	Nigeria 's plans against Novel Coronavirus	2020-01-28	Before	the virus seemed to have morphed and evolved into a more virulent and sinister infection that causes more harm than a common cold	yes	evolve
AUS	SMH	What we know about coronavirus;Explainer	2020-01-31	Before	People have less natural immunity to a new or mutating strain, which is why outbreaks of this kind can be dangerous.	no	mutate
INDIA	TOI	Yale prof warns over handling of coronavirus cases	2020-02-01	Before	At this point, it's fair to say that this (mutation) probably happened at the time that this virus jumped from whichever animal sources to humans."	no	mutate
INDIA	TOI	Yale prof warns over handling of coronavirus cases	2020-02-01	Before	"The new Coronavirus seems to have become stable in humans and the spread of cases reflects this new adaptation to humans."	no	adapt
CANADA	Globe and Mail	OPINION;Our coronavirus response requires good risk communication - leave the ghouls out of it;We need to apply lessons learned during the SARS, H5N1 outbreaks and avoid using needlessly sensationalist language	2020-02-01	Before	" coronaviruses "evolve as quickly as a nightmare ghoul.""	yes	evolve
INDIA	Hindu	Is Vizag ready to handle nCoV?	2020-02-02	Before	"The strain in this virus is new and mutated and there is no vaccine as of now."	no	mutate
USA	NYT	Rise in Cases Suggests Epidemic Is Pandemic: [Foreign Desk]	2020-02-03	Before	"how fast the virus can mutate and whether it will fade out when the weather warms."	no	mutate
CANADA	Globe and Mail	OPINION;The time to tackle the next epidemic is now;Pathogenic threats are flaring up worldwide with growing frequency, and we need to address the underlying causes	2020-02-11	Before	"zoonotic diseases....are emerging and evolving at an alarming speed.."	yes	evolve
INDIA	TOI	Coronavirus readiness: Panchkula needs infrared thermometers	2020-02-20	Before	"Explaining the latest threat, experts pointed out that nCoV was a mutated strain of the coronavirus group to which humans are yet to grow a resistance."	no	mutate
CANADA	Globe and Mail	Varied rates of virus spread raise questions;Specialists in China, Japan point to role officials responding to epidemic may have played in severe regional outbreaks	2020-02-20	Before	hat the virus in Hubei has mutated to a more deadly form.	no	mutate
UK	Daily Mail	MORE AGGRESSIVE STRAIN EMERGES IN CHINA	2020-03-05	Before	"Researchers believe the original strain of the Covid-19 virus has mutated into a more aggressive type after crossing from animals into humans in Wuhan late last year."	no	mutate
UK	Daily Mail	MORE AGGRESSIVE STRAIN EMERGES IN CHINA	2020-03-05	Before	"By the time a vaccine is ready, which is unlikely to be for at least 18 months, it should be possible to fine-tune it to match whatever mutations have emerged."	no	emerge
UK	Sun	THE BUG BANG;COVID-19 FLU CRISIS PANIC GROWS AS 87 BRITS INFECTED BIGGEST UK LEAP IN CASES EPIDEMIC FEARS SOAR ACTION PLAN IS RAMPED UP	2020-03-05	Before	"Scientists last night said the virus has "mutated" into two strains - with the most aggressive infecting 70 per cent of patients."	no	mutate
UK	Daily Mail	DON'T PANIC	2020-03-10	Before	"As Covid-19 evolves it should become less virulent."	yes	evolve
INDIA	Hindu	COVID-19 not a virus you can bottle up but unlikely a bioweapon: NCBS chief	2020-03-25	Before	"He said the center was working with the government to better understand the India-specific strains of the virus to see how it is mutating."	no	mutate
INDIA	Hindu	COVID-19 not a virus you can bottle up but unlikely a bioweapon: NCBS chief	2020-03-25	Before	""Viruses mutate quickly, and there is a lot of research we can do here "	no	mutate
INDIA	Hindu	COVID-19 not a virus you can bottle up but unlikely a bioweapon: NCBS chief	2020-03-25	Before	"it has an extremely aggressive nature, designed to mutate from person to person"	no	mutate
INDIA	TOI	Spike protein of Indian strain of nCov undergoes unique mutation	2020-04-04	Before	"Scientists tracking changes in the genetic makeup of the novel coronavirus"	no	change
INDIA	TOI	Spike protein of Indian strain of nCov undergoes unique mutation	2020-04-04	Before	"These mutations although minor in their significance are crucial to study the changes in the virus's genetic makeup over a period of time"	no	change
AUS	Age	Conspiracy theories going viral	2020-04-06	Before	They've found a close match in a bat virus discovered in 2013, and say this new strain can only have evolved in nature, and its effectiveness as a weapon is debateable because it is so hard to control and not as deadly as other pathogens.	yes	evolve
NIGERIA	Punch	Lessons to learn from 1918 Spanish flu as the world battles COVID-19	2020-04-08	Before	With this, what the world must now pray against is a possible mutation of COVID-19, as was the case with the 1918 Spanish flu.	no	mutate
NIGERIA	Punch	Lessons to learn from 1918 Spanish flu as the world battles COVID-19	2020-04-08	Before	History shows that following a mutation of the virus, a second wave of the 1918 Spanish flu surfaced and dealt more devastating blow to the world.	no	mutate
UK	Daily Mail	HOW SICKENING THAT CHINA WILL NOW EXPLOIT THE FALLOUT OF VIRUS IT GAVE THE WORLD	2020-04-09	Before	""Yet this is the nation that failed to alert the world at the earliest opportunity to this new strain thought to have evolved in its unsanitary live animal markets; allowed the virus to incubate and spread for vital weeks before conceding it was a major public health issue; and which has by common consent been less than honest about infection and death rates.	yes	evolve
UK	Daily Mail	CORONA: WHAT WE NOW KNOW	2020-04-11	Before	"That may explain why a survey from Wuhan, where the virus first emerged late last year, has found that smokers infected with coronavirus were 14 times more likely to develop severe symptoms."	no	emerge
UK	Daily Mail	CORONA: WHAT WE NOW KNOW	2020-04-11	Before	"A study by Cambridge University confirmed this week that Covid-19 has mutated into three distinct strains, Type A, B and C"	no	mutate
NIGERIA	The Nation	To conspiracy theorists	2020-04-11	Before	It is just that this particular strand or strain (whatever they say in science) is mutated to become what we have no cure for, and that is what we are finding a cure for	no	mutate
INDIA	Hindu	Coronavirus | Data is key to control of this pandemic, says Soumya Swaminathan	2020-04-12	Before	"So we believe whatever strategies are now being used to develop both therapeutics or vaccines are not threatened by any changes in the virus."	no	change
INDIA	Hindu	Coronavirus | Data is key to control of this pandemic, says Soumya Swaminathan	2020-04-12	Before	"Viral evolution and transmission dynamics can be studied by analysing genetic sequence data.	yes	evolve
UK	Daily Mail	PASTEUR REPORT BOMBSHELL: CATTLE, SHEEP AND EVEN CATS	2020-04-18	Before	"The novel strain of coronavirus responsible for the current pandemic may have evolved to infect domestic cats and many species of farm animal potentially creating a vast haven from which it may repeatedly invade humans, new research has found."	yes	evolve
UK	Daily Mail	PASTEUR REPORT BOMBSHELL: CATTLE, SHEEP AND EVEN CATS	2020-04-18	Before	"Their findings suggest that, beyond infecting bats, pangolins and humans, it has also evolved the ability to infect at least ten other creatures. The danger list includes cats, cows, goats, pigs, sheep, buffalo and pigeons."	yes	evolve
UK	Daily Mail	PASTEUR REPORT BOMBSHELL: CATTLE, SHEEP AND EVEN CATS	2020-04-18	Before	"This raises the possibility that, having jumped from humans into these mammals, the virus might mutate into new, even more lethal forms that could then emerge to infect people again."	no	mutate
NIGERIA	Punch	Mass testing best approach to tame COVID-19 not lockdown –Njemanze	2020-04-21	Before	Why, because we need to know how the outbreak began and how this variant came up, so in future if any other one comes up, we can differentiate it. -- PROBS NOT BUT WANT TO CHECK	no	come
NIGERIA	Punch	Seven things you shouldn’t do when lockdown ends	2020-05-02	Before	“Not to be the bearer of bad news, but as a global society, we can’t say for certain what will happen next – if a sudden surge in new coronavirus cases will makeit necessary to reinstitute quarantine measures, as has happened in Singapore and Hong Kong, or, worse, if a new strain emerges,” Dolcourt said.	no	emerge
UK	Daily Mail	HOW PM IGNORED HIS OWN ADVICE ON SHAKING HANDS	2020-05-06	Before	"It notes that some strains are not found elsewhere, suggesting the virus has been circulating in the UK and mutating for some time."	no	mutate
USA	NYT	Virulent Mutation? Geneticists Have Doubts: [Foreign Desk]	2020-05-07	Before	"But there is no compelling evidence yet that it is evolving in a way that has made it more contagious or more deadly."	yes	evolve
USA	NYT	Virulent Mutation? Geneticists Have Doubts: [Foreign Desk]	2020-05-07	Before	"It does mutate, but that's what viruses do."	no	mutate
USA	NYT	Virulent Mutation? Geneticists Have Doubts: [Foreign Desk]	2020-05-07	Before	"Natural selection can favor viruses carrying a beneficial mutation, leading it to spread more widely."	no	spread
USA	NYT	Virulent Mutation? Geneticists Have Doubts: [Foreign Desk]	2020-05-07	Before	"None of the critics ruled out the possibility that a mutation could arise that would make the virus more transmissible."	no	arise
USA	NYT	Virulent Mutation? Geneticists Have Doubts: [Foreign Desk]	2020-05-07	Before	"All viruses mutate, and the coronavirus is no exception."	no	mutate
INDIA	Hindu	Key ICMR panel on vaccines dissolved	2020-05-10	Before	"ICMR plans to study whether novel coronavirus strain in India changed form"	no	change
INDIA	TOI	Significant mutation in virus: Hamdard study	2020-05-19	Before	Low sampling rate and a smaller number of genome submissions are major bottlenecks in the assessment of the evolution of SARS-CoV-2 in India	yes	evolve
INDIA	TOI	Significant mutation in virus: Hamdard study	2020-05-19	Before	"The novel coronavirus causing Covid-19 in India has undergone significant genetic changes or mutation, a study conducted by researchers from Jamia Hamdard in collaboration with Hyderabad-based Envirozyme Biotech And BioInception Labs in Cambridge (UK) has revealed."	no	mutate
INDIA	TOI	Significant mutation in virus: Hamdard study	2020-05-19	Before	Professor Seyed E Hasnain, the vice-chancellor of Jamia Hamdard, said that they found that some protein in the Indian strain had diverged from the Wuhan strain	no	diverge
USA	WSJ	A Political Assault on Antibody Tests	2020-05-20	Before	"Or will it require a seasonal shot as new strains emerge, as with influenza?"	no	emerge
INDIA	TOI	85% of mutations found were from hotspots like city'	2020-05-27	Before	"Team members told TOI that while the analysis is still going on and will take more time for concrete results, they have been able to identify hotspots for the virus mutation"	no	mutate
USA	WSJ	REVIEW --- So Where Did the Virus Come From? --- Research into the origins of the new coronavirus raises questions about how it became so infectious in human beings.	2020-05-30	Before	"A study published in early May by scientists at the Broad Institute in Cambridge, Mass., and at the University of British Columbia has uncovered an unusual feature of the virus's recent development: It has evolved too slowly."	yes	evolve
USA	WSJ	REVIEW --- So Where Did the Virus Come From? --- Research into the origins of the new coronavirus raises questions about how it became so infectious in human beings.	2020-05-30	Before	"That leaves little time for evolutionary adaptation, so the months during which the virus fine-tuned its ability to infect human beings were presumably before this and somewhere other than the market in Wuhan."	yes	evolve
NIGERIA	The Nation	New strain of COVID-19 in Nigeria possible - Minister	2020-06-11	Before	we raised the question whether there has been mutation since then in people coming from other areas	no	mutate
NIGERIA	The Nation	New strain of COVID-19 in Nigeria possible - Minister	2020-06-11	Before	There is a possibility of a new strain of the deadly COVID-19 in the country as a result of mutation	no	mutate
NIGERIA	Punch	PTF meets governors, security agencies as COVID-19 cases surge	2020-06-12	Before	“It was confirmed to be the same strain as what was circulating in Italy and China. So, we raised the question whether there has been mutation since then in people coming from other areas.	no	mutate
CANADA	Globe and Mail	Promising treatments for COVID-19 advanced by Canadian scientists;Innovators hope to translate discoveries into commercial success	2020-06-18	Before	"The treatment can also rapidly be altered if mutations occur or as new pathogens emerge"	no	mutate
INDIA	TOI	CDRI, IITR study to decode Covid conundrum	2020-06-28	Before	"The main purpose of the sequencing is to know how the virus has been mutating in Uttar Pradesh,"	no	mutate
INDIA	TOI	CDRI, IITR study to decode Covid conundrum	2020-06-28	Before	"The virus sequencing of such patients will help them understand whether the virus is the same everywhere or it is mutating, he said."	no	mutate
NIGERIA	Punch	Nigeria may develop new strain of COVID-19, scientists warn	2020-06-28	Before	A professor of virology and former Vice-Chancellor at the Redeemer’s University, Nigeria, Ede, Osun State, Oyewale Tomori, told PUNCH HealthWise that themore there is community spread of the infection, the higher the chance of virus mutation to form a new strain that is peculiar to Nigeria.	no	form
NIGERIA	Punch	Nigeria may develop new strain of COVID-19, scientists warn	2020-06-28	Before	Prof. Tomori said, “The more the community spread, the higher the chance of virus mutation.”	no	mutate
INDIA	TOI	Recovery Rate Of Foreign Returnees Is Around 22%, Below 42% For Local Cases	2020-06-29	Before	"The gene structure of the virus that emerged in China and Europe seems to be different from that of the south-east Asian variety."	no	emerge
INDIA	TOI	Recovery Rate Of Foreign Returnees Is Around 22%, Below 42% For Local Cases	2020-06-29	Before	We need to understand the gene mutation process of the virus.	no	mutate
USA	NYT	Did a Mutation Help the Coronavirus Spread? More Evidence, but Lingering Questions [With graphic(s)]	2020-07-02	Before	“But this is an extraordinarily challenging problem; the evolution and demography are complex, so there’s much more work to be done.” Quoted from scientist	yes	evolve
INDIA	TOI	ILS establishes cultures of coronavirus	2020-07-13	Before	"ILS statement said studies using genome sequencing approaches are underway for understanding stability and detecting any mutation in established cultures."	no	mutate
CANADA	Globe and Mail	Will COVID-19 resemble the annual flu?	2020-07-14	Before	And if the virus morphs, it might begin to resemble other infectious diseases that follow seasonal patterns.	no	morph
CANADA	Globe and Mail	Will COVID-19 resemble the annual flu?	2020-07-14	Before	In the case of SARS-CoV-2, "it doesn't currently have a huge amount of pressure on it to change because it transmits quite effectively," she explains.	no	change
CANADA	Star	How did Europe get it so wrong?;The continent said it was prepared. Pride was its downfall	2020-07-25	Before	"As recently as February, when European health ministers met in Brussels to discuss the coronavirus emerging in China"	no	emerge
INDIA	TOI	All five clades of Covid-19 genome found in Odisha	2020-08-02	Before	"The phylogenetic analysis (study of relationship between different strains of virus) showed that clades 20A and 20B evolved quite rapidly in the Indian population and are major source of disease transmission in the country as well as in Odisha."	yes	evolve
USA	WSJ	The Covid Storm: A Pandemic Was Inevitable. Why Was No One Ready? --- Scientists warned of pathogens for decades, yet when Covid-19 arrived, the world had few resources and little understanding	2020-08-14	Before	"Dr. Shi has recently become known after U.S. officials and others suggested, without evidence, the coronavirus that caused Covid-19 emerged from her lab in Wuhan, which she has denied."	no	emerge
CANADA	Star	We're all living in a science-fiction novel now;Let's make sure that when this ends, it'll be a sunnier day for everyone	2020-08-15	Before	"It's also why we've never had a vaccine against the common cold, which is caused by a vast, ever-mutating range of coronaviruses"	no	mutate
UK	Sun	TWO EU PATIENTS GET COVID AGAIN	2020-08-26	Before	""Viruses mutate and that means a potential vaccine is not going to be a vaccine that will last forever, for ten years, probably not even five years. Just as for flu, this will have to be redesigned regularly.""	no	mutate
INDIA	Hindu	Coronavirus | Different kinds of SARS-CoV-2 exist in India but none more lethal than the other: Indian Academy of Sciences President	2020-08-27	Before	Earlier, there was the ancestral type - the Wuhan virus type, from which 10 lineages had evolved.	yes	evolve
INDIA	Hindu	Coronavirus | Different kinds of SARS-CoV-2 exist in India but none more lethal than the other: Indian Academy of Sciences President	2020-08-27	Before	By reconsidering the mode and tempo of evolution of the virus and also to time-stamp a lineage, the earlier lineage definitions have been revised.	yes	evolve
INDIA	Hindu	Coronavirus | Different kinds of SARS-CoV-2 exist in India but none more lethal than the other: Indian Academy of Sciences President	2020-08-27	Before	Further, an evolved lineage is given a separate identity if it differs from the existing lineages by at least two DNA changes (mutations).	yes	evolve
INDIA	Hindu	Coronavirus | Different kinds of SARS-CoV-2 exist in India but none more lethal than the other: Indian Academy of Sciences President	2020-08-27	Before	Based on the revised time-stamped nomenclature, there are now five lineages: 19A, 19B, 20A, 20B and 20C. The first two digits reflect the year in which the lineage evolved.	yes	evolve
INDIA	Hindu	Coronavirus | Different kinds of SARS-CoV-2 exist in India but none more lethal than the other: Indian Academy of Sciences President	2020-08-27	Before	A defining mutation of the former A2a lineage was D614G; meaning that at the 614th position in the viral sequence there was an amino acid substitution from aspartic acid in the pre-existing lineage to glycine in the evolved A2a lineage.	yes	evolve
INDIA	TOI	New Covid-19 sub-strain may be behind spike in T +ve cases	2020-09-03	Before	"A clade is a sub-strain of a virus strain (in this cases SARS-CoV-2) and usually a small variation that happens due to mutations"	no	mutate
INDIA	TOI	Covid-19 in Mumbai: After suspected reinfection, hospital sends samples for genomic study	2020-09-10	Before	this is another indirectly evolution-y one "BMC's additional municipal commissioner Suresh Kakani, however, said the civic doctors have sent some samples to NIV, Pune, for reconfirmation after they found some "changes" after the genome of the samples were sequenced."	no	change
CANADA	Star	COVID vaccine could also help cure common cold;U.S. army researchers targetting all coronavirus, including cold strains	2020-09-19	Before	"When this virus emerged, it was sort of coming toward the tail end of the flu season"	no	emerge
CANADA	Star	COVID vaccine could also help cure common cold;U.S. army researchers targetting all coronavirus, including cold strains	2020-09-19	Before	"Walter Reed's researchers have also found that there is very little mutation occurring in the virus"	no	mutate
CANADA	Star	COVID vaccine could also help cure common cold;U.S. army researchers targetting all coronavirus, including cold strains	2020-09-19	Before	"They think that is because COVID-19 spread so rapidly that the virus didn't have a chance to mutate."	no	mutate
INDIA	TOI	Covid roundup: No 'significant mutation' in India, sharp decline in testing & more	2020-09-21	Before	"No significant or drastic mutation in strains of SARS-CoV-2 has been found in India till now, Union minister Harsh Vardhan said on Sunday during an interaction with his social media followers."	no	mutate
INDIA	TOI	Covid roundup: No 'significant mutation' in India, sharp decline in testing & more	2020-09-21	Before	"He also said the Indian Council of Medical Research has been conducting large-scale sequencing of nationally representative strains collected over a few months and detailed results on mutations of the virus will be available in early October."	no	mutate
INDIA	TOI	G-strain mutation won't affect Covid-19 vaccine	2020-10-09	Before	"Vaccines currently being developed for Covid-19 should not be affected by recent mutations in the virus, according to a new study involving a University of York virologist that has been published in npj-Vaccine, brought out by Nature, the leading scientific journal."	yes	mutate
INDIA	TOI	G-strain mutation won't affect Covid-19 vaccine	2020-10-09	Before	"Since then, the virus has evolved to the globally dominant 'G-strain', which now accounts for about 85% of published SARS-CoV-2 - the virus causing Covid-19 - genomes.""	no	evolve
USA	NYT	The Race to Develop An Antibody Cocktail: [Science Desk]	2020-10-13	Before	"suggesting that the treatment may protect against any coronaviruses emerging in the future"	no	emerge
USA	NYT	The Race to Develop An Antibody Cocktail: [Science Desk]	2020-10-13	Before	"Using a single antibody, as Lilly does, poses some risk of the virus mutating to escape it"	no	mutate
USA	WSJ	Jersey Shore Town Tied to NYC Uptick	2020-10-19	Before	Some communal officials felt that messages disseminated across conservative news outlets and social media, including by President Trump, played down the threat of the virus and the need to wear masks, leading some people to not take it seriously. To dispel myths circulating at the time, the doctors added that the virus hadn't mutated into a milder strain and that the community hadn't developed he…	no	mutate
UK	Daily Mail	MINK STRAIN COULD SET BACK VACCINE'	2020-11-09	Before	When we see a mutated version of coronavirus and if it spreads, it will undermine our ability to make an effective vaccine.'	no	mutate
USA	NYT	Before a Vaccine, a Hard Road Ahead: [National Desk]	2020-11-13	Before	"Some scientists are worried that the virus in animals, like the mink, could mutate and be more dangerous to humans"	no	mutate
UK	Daily Mail	SHAUN THE SHEEP AND PADDY FIELDS: WHERE THE MONEY'S SPENT	2020-11-24	Before	China is a major pig producer, where pigs are reared in large holdings under sometimes crowded conditions; a perfect breeding ground for the evolution and emergence of new strains of virus.	yes	evolve
UK	Sun	NEW STRAINS OF VIRUS NOT SPREADING FASTER	2020-11-26	Before	THE Coronavirus has mutated but new strains aren't making it spread faster, scientists have claimed.	no	mutate
UK	Sun	NEW STRAINS OF VIRUS NOT SPREADING FASTER	2020-11-26	Before	Researchers said the virus will change over time and stated that people need to remain "vigilant" against new strains.	no	change
INDIA	Hindu	Karnataka has seen seven lineages of SARS-CoV-2: Expert	2020-11-27	Before	"it has seen smaller changes within the genetic composition in the last eight months, "	no	change
USA	WSJ	World News: Millions of Dead Mink Pose Gruesome Problem for Danes	2020-12-02	Before	Farmers were instructed to kill the animals, which are raised for their fur, after researchers last month found they could serve as a reservoir for a strain of the virus that can resist the vaccines being developed. At least 12 Danes have been infected with the mutated strain connected to mink.	no	mutate
USA	WSJ	Decoding the NFL's Covid Cases --- The NFL uses genomic sequencing to map out how coronavirus spreads through teams.	2020-12-12	Before	The sequences are informative because the virus periodically mutates, and over time those changes are significant enough that variants of the virus are distinguishable from one another.	no	mutate
USA	NYT	February Superspreader Kept Spreading, Infecting as Many as 300,000 by October: [Foreign Desk]	2020-12-13	Before	""We think the mutation arose in early or mid-February,""	no	mutate
USA	WSJ	U.S. News: Variant Of Virus Identified In the U.K.	2020-12-15	Before	Viruses replicate quickly and mutations are common due to tiny errors in copying genetic material, which can accumulate over time, giving rise to new variants that can behave slightly differently to older strains.	no	rise
UK	Daily Mail	NEW STRAIN LINKED TO SURGES IN THE SOUTH	2020-12-15	Before	It is fairly unlikely they will be massively advantaged by an ability to evolve around those variants.	yes	evolve
UK	Daily Mail	NEW STRAIN LINKED TO SURGES IN THE SOUTH	2020-12-15	Before	It is important to keep a calm and rational perspective on the strain as this is normal virus evolution and we expect new variants to come and go and emerge over time.	yes	evolve
UK	Daily Mail	NEW STRAIN LINKED TO SURGES IN THE SOUTH	2020-12-15	Before	the development was potentially serious,' adding that pressure on the virus to evolve has increased by so many millions of people having now been infected.	yes	evolve
UK	Sun	Fears after new Covid strain found in the south of England;WARNING OVER HOMECOMING TRAVEL PLANS 'TOO EARLY' TO SAY IF IT'S HERE YET	2020-12-15	Before	Prof Staines said the nature of Covid means it will change and this is not unusual.	no	change
UK	Sun	STRAINGER DANGER;NIC UNDER PRESSURE..BUT JABS DRIVE GATHERS PACE Fresh curbs warning over mutated virus Fear new 'variant' spreads at faster rate viru	2020-12-15	Before	The First Minister said the emergence of the "variant" - revealed by Westminster Health Secretary Matt Hancock - could spark the need for extra precautions to be taken.	no	emerge
UK	Sun	STRAINGER DANGER;NIC UNDER PRESSURE..BUT JABS DRIVE GATHERS PACE Fresh curbs warning over mutated virus Fear new 'variant' spreads at faster rate viru	2020-12-15	Before	Top microbiologist Professor Hugh Pennington stressed the latest strain was expected and does not necessarily mean the virus is becoming "more transmissible".	no	become
INDIA	TOI	Indore: Repeat positive tests increase hospital stay of Covid patients in November	2020-12-16	Before	"The re-surge in infections after stabilisation is primarily because changes in strain of virus that occurred over a period of time, added Dr Dongre.	no	change
UK	Sun	8 DEAD, 329 NEW CASES	2020-12-16	Before	When a novel variant like this emerges it's always important that we assess it and keep an eye on it. But at this stage there's nothing to be overly concerned about.	no	emerge
UK	Sun	BUBBLE 'N' STRIFE;THREAT TO FESTIVE SEASON AS MILLIONS GO INTO TIER 3 Bust-up over 5-day Xmas easing PM under pressure to give way today	2020-12-16	Before	But it is not, it is rising, and the emergence of a new strain of the virus has introduced further potential jeopardy." Daily	no	emerge
UK	Sun	TIER WE GO AGAIN…;NIC CHOPS XMAS SHORT AND CHANGES SCHOOLS RETURN XMAS ON..FOR ONE DAY ONLY CROSS-BORDER TRAVEL BAN LOCKDOWN ON BOXING DAY SCHOOLS CLOSED 'TIL JAN 18 SHOPS & PUBS DEVASTATION	2020-12-20	After	The virus has changed, but our fundamental methods of fighting back have stayed the same."	no	change
UK	Sun	WE FACE NIGHTMARE	2020-12-20	After	These strains evolve, occur by chance and mutate organically.	yes	evolve
UK	Sun	JINGLE HELL;PM ANNOUNCES NEW CLAMP ON XMAS Boris: Virus has changed its attack Tier 4 lockdown wrecks festive hols	2020-12-20	After	When the virus changes its method of attack, we must change our method of defence.	no	change
NIGERIA	Punch	Nigeria lost 10 children to COVID-19 — NCDC	2020-12-20	After	Once a virus starts romanticizing its environment, more so people and animals, it can change its form and you can’t really predict it.	no	change
INDIA	Hindu	Morning Digest: Health Ministry team to meet on mutant variant of coronavirus, India and U.S. mull unfinished business as Trump tenure winds down, and more	2020-12-21	After	"The Health Ministry has called a meeting of its joint monitoring group (JMG) on COVID-19 on Monday to discuss the emergence of a mutant variant of the coronavirus in the UK, which has reportedly led to a surge in infection rates there."	no	emerge
CANADA	Star	Canada suspends flights coming from Britain;Recently discovered coronavirus mutation prompts quick reaction	2020-12-21	After	Changes in a virus are normal and an expert quoted in the article said there is no evidence that this new version will "evade the vaccination or a human immune response."	no	change
AUS	SMH	New virus type disease's 'worst moment'	2020-12-21	After	A mutated coronavirus strain up to 70 per cent more transmissible than earlier versions is spreading rapidly across Britain, shattering the Christmas plans of tens of millions and stoking fears of a major third wave in Europe.	no	mutate
AUS	SMH	New virus type disease's 'worst moment'	2020-12-21	After	Studies suggest the variant formed in September and accounted for 28 per cent of new infections in London by mid-November.	no	form
AUS	SMH	New virus type disease's 'worst moment'	2020-12-21	After	The discovery of the mutated strain was announced on Monday but scientific analysis of its impacts were not concluded until recent days.	no	mutate
AUS	SMH	New virus type disease's 'worst moment'	2020-12-21	After	"When the science changes, we must change our response and when the virus changes its method of attack, we must change our method of defence,"	no	change
USA	NYT	Coronavirus Update: [Foreign Desk]	2020-12-22	After	"The anxiety about the virus mutation grew after Prime Minister Boris Johnson of Britain said on Saturday that it had been shown to be 70 percent more contagious than other variants"	no	mutate
USA	NYT	Coronavirus Update: [Foreign Desk]	2020-12-22	After	"Infectious disease experts say that viral mutations are not uncommon, and British officials said that this variant had been detected in a handful of other countries"	no	mutate
USA	NYT	EU Urges Member Countries to Lift Blanket Travel Bans for Britain	2020-12-22	After	"move swiftly to reverse travel bans imposed over the past few days in an effort to stop the spread of the new variant of the coronavirus that has emerged in Britain"	no	emerge
USA	NYT	EU Urges Member Countries to Lift Blanket Travel Bans for Britain	2020-12-22	After	"before full results from laboratory studies would allow for a fuller understanding of how the mutations might impact the effectiveness of the vaccine"	no	mutate
USA	NYT	U.K. and France Work to Help Stranded Truckers and Ease Fears of Food Shortages	2020-12-22	After	"Britain does considerably more genomic sequencing than other countries, allowing it to detect mutations more quickly"	no	mutate
UK	Daily Mail	PERFECT STORM BATTERS POUND AND SHARES	2020-12-22	After	The emergence of a fast-spreading new variant of coronavirus has led to the introduction of Tier Four restrictions in London and much of the South Eas	no	emerge
INDIA	Hindu	Flyers from United Kingdom to be tested, quarantined	2020-12-22	After	"In the wake of reports of a new variant of the coronavirus having emerged in the United Kingdom, air passengers from the U.K. arriving at Chennai airport on Monday night and in the early hours of Tuesday would have to undergo an RT-PCR test and institutional quarantine."	no	emerge
UK	Sun	DON'T BE SO SHELFISH;PM URGES BRITS NOT TO GRAB ALL THE TURKEYS Fury at panic-buying shoppers Shelves stripped of Xmas food Fears as France cuts off goods But stores say there's plenty	2020-12-22	After	But Public Health England said it is "very likely" that the strain emerged in the UK.	no	emerge
NIGERIA	Punch	UK’s new COVID-19 variant found in Nigeria, scientists say	2020-12-22	After	The RUN study, first published last September 6 in The Conversation [https://theconversation.com/nigerian-scientists-have-identified-seven-lineages-of-sars-cov-2-why-it-matters-144234], a copyright-free news channel, stated that genome sequencing helped researchers to understand the virus, its epidemiology and evolution.	yes	evolve
NIGERIA	Punch	UK’s new COVID-19 variant found in Nigeria, scientists say	2020-12-22	After	We do not know much about SARS-CoV-2 yet. And we don’t know if the virus will mutate into a new strain down the line.	no	mutate
NIGERIA	The Nation	Govt mulls travel ban	2020-12-22	After	We are more concerned about the new strain of COVID-19, which is manifesting itself in the UK; that is the mutated strain	no	manifest
USA	NYT	The Mutant Virus Is Loose. Travel Bans Won't Stop Its Spread.: [Foreign Desk]	2020-12-23	After	"And there are variants that are likely to be popping up in other places which are spreading locally"	no	pop up
USA	NYT	The Mutant Virus Is Loose. Travel Bans Won't Stop Its Spread.: [Foreign Desk]	2020-12-23	After	"two weeks before full results from laboratory studies would allow for a fuller understanding of how the mutations might alter the vaccine's effectiveness"	no	mutate
INDIA	TOI	New Covid strain found in UK not seen in India so far, says govt	2020-12-23	After	Mutated SARS-CoV-2 strain detected in UK has increased transmissibility but this mutation isn't affecting disease severity, case fatality," the health ministry said in a press briefing."	no	mutate
INDIA	TOI	New Covid strain found in UK not seen in India so far, says govt	2020-12-23	After	"The ministry in its statement also warned that the changes in the spike protein of the virus may result in the virus becoming more infectious and spreading more easily between people.	no	become
INDIA	TOI	Uttar Pradesh's weekly Covid-19 positivity rate down to 1%, 1,277 new cases reported in 24 hours	2020-12-23	After	"An evolved strain of the pandemic virus has been recorded in many western countries. While the state is taking all measures to stay ahead of the pandemic virus prevention is the only safe bet," [additional chief secretary, health and family welfare, Amit Mohan Prasad] said."	yes	evolve
INDIA	TOI	Fresh cases go below 1,000	2020-12-23	After	They need to be monitored and checked for any possibility of infection due to the mutated virus strain,"	no	mutate
CANADA	Globe and Mail	Britain's advanced tracking system led to variant find	2020-12-23	After	"Scientists have long warned that the virus would mutate repeatedly, and Britain began sequencing its genome shortly after the pandemic hit in March."	no	mutate
INDIA	Hindu	COVID screening mandatory for all U.K. returnees in A.P.	2020-12-23	After	"In adherence to the letter issued by the Union Secretary of Health in the wake of a new strain of COVID-19 (SARS-CoV-2) surfacing in the United Kingdom, the State government has instructed that all travellers from the U.K. will be screened and made to undergo RT-PCR test."	no	surface
GUYANA	Guyana Chronicle	No decision yet on UK travel ban amid new COVID-19 strain	2020-12-23	After	Over the past few days, a mutation of the virus COVID-19 has been recorded in the UK and this has prompted many countries to ban travel from this country, to mitigate the spread of this mutation.	no	mutate
USA	WSJ	U.S. News: How Scientists Tracked New Variant	2020-12-24	After	Viruses mutate all the time -- though coronaviruses more slowly than some other common viruses like influenza.	no	mutate
UK	Daily Mail	Q&A	2020-12-24	After	The new variant emerged after the first wave of coronavirus at Nelson Mandela Bay, in South Africa's Eastern Cape Province, and rapidly became the dominant strain in the area.	no	emerge
UK	Daily Mail	MERKEL PULLS STRINGS AT 11TH HOUR TO AVOID NO DEAL - NOW WE'RE FINALLY SET TO BID ADIEU	2020-12-24	After	the French government decided to shut its borders for 48 hours after the emergence of a newer, more infectious strain of coronavirus.	no	emerge
INDIA	TOI	Delhi: Covid strikes weak harder, recovery time's longer too	2020-12-24	After	New evidence suggests these patients could be a target for novel coronavirus to replicate and mutate.	no	mutate
INDIA	TOI	Delhi: Covid strikes weak harder, recovery time's longer too	2020-12-24	After	important changes in the virus genome were observed, with the emergence of a viral variant bearing two mutations in the Spike protein	no	emerge
INDIA	TOI	Delhi: Covid strikes weak harder, recovery time's longer too	2020-12-24	After	This study of a chronic SARS-CoV-2 infection represents a rare insight into virus evolution likely driven under the pressure of convalescent plasma	yes	evolve
INDIA	TOI	Delhi: Covid strikes weak harder, recovery time's longer too	2020-12-24	After	SARS-CoV-2, the virus that causes Covid-19, has undergone multiple mutations	no	mutate
INDIA	TOI	Delhi: Covid strikes weak harder, recovery time's longer too	2020-12-24	After	Dr N K Mehra, honorary emeritus scientist at Indian Council of Medical Research and former AIIMS dean, said viruses were known to mutate	no	mutate
INDIA	TOI	Delhi: Covid strikes weak harder, recovery time's longer too	2020-12-24	After	"The virus that causes common cold changes every year	no	change
INDIA	TOI	Delhi: Covid strikes weak harder, recovery time's longer too	2020-12-24	After	SARS-CoV2 is also a mutated version of coronaviruses reported before.	no	mutate
INDIA	TOI	UK returnees to be screened to avoid spread of new strain	2020-12-24	After	"However, as the new strain is likely to create problems for health planners, the government has decided to ensure that people who may be carrying the mutated virus do not enter the state without undergoing medical tests."	no	mutate
INDIA	TOI	11pm to 6am: Night curfew starts in Nagpur	2020-12-24	After	"Maharashtra government had on Monday announced night curfew in all major cities beginning December 22 to be cautious during Christmas and New Year celebrations and also in the backdrop of a new strain of the Coronavirus emerging in the United Kingdom."	no	emerge
INDIA	TOI	Delhi: Came back from UK in last 1 month? Expect govt's knock on your door	2020-12-24	After	"Health minister Satyendar Jain directed teams to go on house-to-house visits to test returnees from the UK where a mutated variant of the Covid virus has been discovered."	no	mutate
USA	NYT	U.S. Will Require Negative Coronavirus Test for All Travelers From the U.K.: [Foreign Desk]	2020-12-25	After	"The move comes as a new highly transmissible variant of the virus, which first appeared in Britain"	no	appear
USA	NYT	U.S. Will Require Negative Coronavirus Test for All Travelers From the U.K.: [Foreign Desk]	2020-12-25	After	"The American travel requirements are less draconian than those of other countries in Europe and Asia, which barred all travelers from Britain after the new coronavirus variant emerged"	no	emerge
USA	NYT	U.S. Will Require Negative Coronavirus Test for All Travelers From the U.K.: [Foreign Desk]	2020-12-25	After	"The country also announced a ban on travel from South Africa after the health secretary, Matt Hancock, said two people had been discovered with another variant that emerged in the African country. "	no	emerge
USA	NYT	U.S. Will Require Negative Coronavirus Test for All Travelers From the U.K.: [Foreign Desk]	2020-12-25	After	"Another variant has also emerged in Nigeria"	no	emerge
INDIA	TOI	9 more UK fliers test positive for Covid, number reaches 29	2020-12-25	After	In Maharashtra, after the emergence of the highly contagious mutant virus strain, a massive surveillance drive has been launched across the state to check for the infection among travellers who came in from UK between November 25 and December 23.	no	emerge
INDIA	TOI	24 UK returnees quarantined in Bhopal	2020-12-25	After	AIIMS-Bhopal director Dr Sarman Singh had cautioned then that research into the protein attached to the Covid-19 virus suggested antigenic component of the virus showed mutation'.	no	mutate
INDIA	TOI	Karnataka orders night curfew: No public new year celebrations	2020-12-25	After	"I request all public to cooperate in view of the new Covid-19 strain that has emerged," Yediyurappa said."	no	emerge
INDIA	TOI	Maharashrta tracks flyers from UK who landed after November 25	2020-12-25	After	"Following the emergence of the highly contagious mutant Covid-19 strain in the UK, a massive surveillance drive has been launched across Maharashtra, including Mumbai, to check for the infection among travellers from the western country who landed in the state between November 25 and December 23."	no	emerge
INDIA	TOI	846 post-Nov 25 arrivals from UK under Covid lens	2020-12-25	After	"There is no no experimental evidence so far," he added.Apart from the NIBG, the state might also take the help of Indian Institute of Chemical Biology (IICB) at Jadavpur for genome analysis of positive samples from flyers who arrived from the UK if there is the need for analysis of more swab samples to detect if the infection was caused by the mutated virus.	no	mutate
INDIA	Hindu	Coronavirus | Over 6,000 travellers from U.K. traced across States	2020-12-25	After	"The samples of these seven positive cases are being sent to the Centre for Cellular and Molecular Biology (CCMB) Hyderabad to check whether the affected persons had the mutated U.K. strain."	no	mutate
INDIA	Hindu	Seven UK returnees test positive	2020-12-25	After	"The samples of the seven positive cases are being sent to the Centre for Cellular and Molecular Biology (CCMB) in Hyderabad to check whether the affected persons had the mutated UK strain"	no	mutate
NIGERIA	Punch	COVID-19 warnings dominate Buhari, govs’ Xmas messages	2020-12-25	After	While leaders advised Nigerians to adhere to COVID-19 protocols, the Africa Centre for Disease Control and Prevention, at a virtual press briefing on Thursdaysaid a new variant of coronavirus had emerged in Nigeria.	no	emerge
NIGERIA	Punch	COVID-19 warnings dominate Buhari, govs’ Xmas messages	2020-12-25	After	Speaking during the media briefing by the PTF in Abuja on Thursday, Iheakwazu said viruses by their nature mutate, noting that the important thing was for peopleto stay calm and safe.	no	mutate
NIGERIA	Punch	COVID-19 warnings dominate Buhari, govs’ Xmas messages	2020-12-25	After	He said, “Over the last few days, we have monitored reports of the virus mutating in the UK, South Africa and some other countries but it is important to establishsome facts about what we know, what we do not know and what we are willing to learn over the next few years.	no	mutate
NIGERIA	Punch	COVID-19 warnings dominate Buhari, govs’ Xmas messages	2020-12-25	After	The most important fact to put out there to calm everybody’s nerves is that viruses mutate all the time.	no	mutate
UK	Daily Mail	TOTAL LOCKDOWN 3 LOOMING	2020-12-26	After	His words followed a grim warning from Health Secretary Matt Hancock about the threat of the new mutant strain of the virus spreading.	no	mutate
UK	Daily Mail	US JOINS THE TRAVEL BAN ON UK ARRIVALS WITHOUT TEST	2020-12-26	After	The move follows the emergence in the UK of a new, more infectious strain of the virus.	no	emerge
INDIA	TOI	India's RT-PCR kits can catch infectious variant: Experts	2020-12-26	After	"Experts from the Indian Council of Medical Research have said that RT-PCR test devices currently being used in the country are fully capable of catching the more infectious coronavirus strain that has emerged in the UK.	no	emerge
INDIA	TOI	India's RT-PCR kits can catch infectious variant: Experts	2020-12-26	After	They were reacting to concerns the mutated strain could evade detection by one type of RT-PCR Covid-19 test."	no	mutate
INDIA	TOI	T on alert as 7 who came from UK test Covid +ve	2020-12-26	After	"Their samples have now been sent to the Centre for Cellular and Molecular Biology (CCMB) for genome sequencing to find out if they are affected by the existing strain or if it's newly mutated and highly infectious B.1.1.7 variant found in the UK."	no	mutate
CANADA	Globe and Mail	COVID-19 variants reveal evolution's power to rearm	2020-12-26	After	"Anyone curious to see evolution playing out in real time need look no further than NextStrain.org,"	yes	evolve
CANADA	Globe and Mail	COVID-19 variants reveal evolution's power to rearm	2020-12-26	After	"a changing virus may become harder for standard COVID-19 tests to spot and for newly approved vaccines to defend against" `	no	change
CANADA	Globe and Mail	COVID-19 variants reveal evolution's power to rearm	2020-12-26	After	"The fact that they have arisen independently after hitting upon some of the same genetic mutations makes it more likely that those mutations are doing something beneficial for the virus."	no	arise
CANADA	Globe and Mail	COVID-19 variants reveal evolution's power to rearm	2020-12-26	After	"When you start to see parallel evolution of certain mutations that rise in frequency, then that's a sign that there's a real biological advantage to them"	yes	evolve
CANADA	Globe and Mail	COVID-19 variants reveal evolution's power to rearm	2020-12-26	After	"It is also another clue that evolution is shaping the trajectory of the variant."	yes	evolve
CANADA	Globe and Mail	COVID-19 variants reveal evolution's power to rearm	2020-12-26	After	"A study published earlier this month in the New England Journal of Medicine demonstrates the potential of such a scenario to repeatedly challenge the virus and favour the emergence of a rare genetic combination"	no	emerge
USA	NYT	How Can We Achieve Herd Immunity? Experts Are Quietly Upping the Number: [Foreign Desk]	2020-12-27	After	"The early range of 60 to 70 percent was almost undoubtedly too low, they said, and the virus is becoming more transmissible, so it will take greater herd immunity to stop it."	no	become
USA	NYT	How Can We Achieve Herd Immunity? Experts Are Quietly Upping the Number: [Foreign Desk]	2020-12-27	After	"Further complicating matters, there is a growing consensus among scientists that the virus itself is becoming more transmissible"	no	become
INDIA	TOI	More coronavirus strains may emerge, SOPs will keep changing: Experts	2020-12-27	After	"They say that more strains may emerge in the coming weeks and health safety protocols will change accordingly."	no	emerge
INDIA	TOI	More coronavirus strains may emerge, SOPs will keep changing: Experts	2020-12-27	After	"But it is believed that the coronaviruses don't mutate as frequently as influenza viruses do," he said."	no	mutate
INDIA	TOI	334 new Covid-19 cases reported in Odisha	2020-12-27	After	"The testing is being done to know whether the virulent mutated strain of SARS-CoV-2 present in the sample or not. "	no	mutate
INDIA	Hindu	Coronavirus | Oxford COVID-19 vaccine may become the first to get Indian regulator's nod for emergency use	2020-12-27	After	"Amid fears about the mutated variant of SARS-CoV-2 detected in the UK, government officials recently said that it will have no impact on the potential of emerging vaccines that are being developed in India and other countries."	no	mutate
INDIA	Hindu	Karnataka government wants to start physical classes for intermediate semesters	2020-12-27	After	"In case there is a second wave or the mutated coronavirus strain that is spreading in the U.K. reaches the State, we may have to shift back to online classes."	no	mutate
UK	Sun	Better days ahead.";JOY AS FIRST VACCINE BATCH ARRIVES JAB ROLLOUT BEGINS ON WEDNESDAY	2020-12-27	After	he said recent concern over the emergence of a mutant strain of Covid-19 in parts of England highlights the continued uncertainty.	no	emerge
USA	NYT	E.U. Sets in Motion a Plan to Vaccinate Nearly Half a Billion People: [Foreign Desk]	2020-12-28	After	"But supply shortages, logistical hurdles, misinformation, public skepticism and the sheer scale of the effort ensure that it will be an uphill struggle against a virus that is constantly evolving"	yes	evolve
INDIA	TOI	Why a 'more contagious' coronavirus may not be as bad as it sounds	2020-12-28	After	"According to Smith, there's a "delicate equilibrium" between a pathogen and a host that allows the virus to evolve into a less lethal strain."	yes	evolve
INDIA	TOI	Why a 'more contagious' coronavirus may not be as bad as it sounds	2020-12-28	After	"And while experts are divided on whether a mutation is more or less likely to be deadly, they do agree on one thing - don't give the virus a chance to evolve and find a set of mutations that are advantageous. "	yes	evolve
INDIA	TOI	Why a 'more contagious' coronavirus may not be as bad as it sounds	2020-12-28	After	"Several nations, including India, have announced various degrees of curbs to prevent the spread of the mutated coronavirus even as the world gradually begins the pushback against the pandemic with early vaccination campaigns."	no	mutate
INDIA	TOI	Eight from UK test positive for Covid in Kerala	2020-12-28	After	Speaking to reporters in Kannur on Saturday, the minister said that the health department and the state government were vigilant over the emergence of the new strain and that the state was screening all recent arrivals from the UK.	no	emerge
UK	Sun	Party sacrifice could make a big difference;ON CALL with Dr Zoe	2020-12-28	After	new strain is thought to have emerged in Kent and London and has already reached all corners of the UK, while a new South African mutation has also been identified in London and the North.	no	emerge
USA	NYT	Everything Is Shut Down, Except for the Slopes: [Foreign Desk]	2020-12-29	After	"But after new, more transmissible coronavirus variants emerged in Britain and South Africa,"	no	emerge
INDIA	TOI	Uttar Pradesh CM orders RT-PCR test of UK returnees	2020-12-29	After	"Chief minister Yogi Adityanath on Sunday pitched for the procurement of new equipment for better-quality healthcare in the aftermath of a mutated virus strain in the UK."	no	mutate
INDIA	Hindu	After government at doorstep Mamata announces redressal camp in neighborhood	2020-12-29	After	"A new strain of coronavirus has surfaced in the UK and it is being said that it is more potent."	no	surface
USA	NYT	Easily Spread Variant Found in Colorado: [Correction]	2020-12-30	After	"It is normal for viruses to mutate, and most of the mutations of the coronavirus have proved minor"	no	mutate
USA	NYT	Easily Spread Variant Found in Colorado: [Correction]	2020-12-30	After	"He responded to the emergence of B.1.1.7 by enforcing stronger restrictions on people's movements and the size of gatherings"	no	emerge
USA	NYT	Easily Spread Variant Found in Colorado: [Correction]	2020-12-30	After	"When the virus changes its method of attack, we must change our method of defense,"	no	change
USA	NYT	U.K. Authorizes COVID-19 Vaccine From Oxford and AstraZeneca	2020-12-30	After	"The global effort to accelerate vaccinations, coming as a new, more contagious variant of the virus has emerged in Britain"	no	emerge
INDIA	TOI	Can't dismiss seriousness of mutation: ICMR scientists	2020-12-30	After	"A symbiotic relationship can evolve in which a virus goes from an epidemic existence to an endemic one with less virulence."	yes	evolve
INDIA	TOI	NY ahead, MHA extends guidelines till Jan 31	2020-12-30	After	"The ministry, while extending validity of the norms last announced on November 25, noted that though the overall situation in the country appeared optimistic with a steady decline in active cases over the past 2-3 months, there was need to maintain caution and strict surveillance in view of the surge in cases globally and emergence of new variant of the virus in the UK."	no	emerge
INDIA	Hindu	Coronavirus | Kerala on high alert, no reports of new variant: Health Minister	2020-12-30	After	"The new genetically modified virus has been confirmed in six U.K. returnees in the country, according to the Union Ministry of Health."	no	modify
INDIA	TOI	UK variant has potential for 2nd wave: CCMB chief	2020-12-31	After	"We should also keep an eye on other variants that might emerge independently, as India houses the second largest population infected with this virus at present."	no	emerge
INDIA	TOI	Noida woman 2nd UP patient with UK strain of Covid-19	2020-12-31	After	"A 33-year-old woman from Gautam Budh Nagar is the second person from Uttar Pradesh who has tested positive for the mutant UK strain of Covid-19."	no	mutate
INDIA	TOI	Public celebrations of New Year banned in Vij	2020-12-31	After	"The whole world is now speaking about a second wave of Covid-19 and a very intense mutated strain has been detected recently in the United Kingdom."	no	mutate
CANADA	Globe and Mail	Britain approves Oxford and AstraZeneca's vaccine	2020-12-31	After	"The country has been struggling with a rampant surge in COVID-19 infections, which scientists believe could be linked to a more contagious variant of the virus that has emerged in recent weeks."	no	emerge
INDIA	TOI	Noida woman tests +ve for UK variant	2021-01-01	After	"The sample of the woman, (33) who had returned on December 17, was sent to CSIR-Institute of Genomics and Integrative Biology (IGIB), Delhi, where genome sequencing detected the mutated virus variant."	no	mutate
INDIA	TOI	Kolkata flyer from London tests positive for mutated virus	2021-01-01	After	"A city-based UK professional, who flew back home from London on an Air India flight on December 20 and tested Covid-positive on arrival, has the mutated UK strain of the virus, the Kalyani-based National Institute of Biomedical Genomics (NIBG) informed the National Centre for Disease Control (NCDC) and the Bengal government late on Tuesday."	no	mutate
INDIA	TOI	Kolkata flyer from London tests positive for mutated virus	2021-01-01	After	" Further research with the mutated strain is needed to understand the functional implications better."	no	mutate
INDIA	TOI	Kolkata flyer from London tests positive for mutated virus	2021-01-01	After	"While it is good that Covid cases in Bengal are dropping, given the emergence of this UK strain, we need to address the issue with due seriousness and promptness," the CM told the health secretary Narayan Swarup Nigam."	no	emerge
INDIA	Hindu	State to conduct second round of sero survey in Jan.	2021-01-01	After	""In the context of the new mutated variant of SARS-CoV-2, we may also have to consider taking up genome sequencing of random samples that test positive through RT-PCR during the survey."	no	mutate
INDIA	Hindu	No mutated strain found among U.K. returnees in Odisha	2021-01-01	After	"The Odisha government on Friday said it had not found mutated U.K. strain among those tested positive for COVID-19 on their return from Britain"	no	mutate
INDIA	TOI	Rajasthan: Health officials keep an eye on unusual trend of Covid	2021-01-02	After	Following a mutated Covid-19 strain found in the UK, the health department has alerted its officials across the state to keep an eye on change in trend such as increasing Covid-19 cases or increasing mortality due to Covid-19 in their respective districts.	no	mutate
INDIA	TOI	Rajasthan: Health officials keep an eye on unusual trend of Covid	2021-01-02	After	So far, not a single sample has been tested positive for the UK's mutated Covid-19 strain in the state, said a senior health department official.	no	mutate
NIGERIA	Punch	COVID-19: Doubts, violation of safety protocols heighten deadlier second wave risk	2021-01-02	After	This is an evolving thing andpeople are learning about it every day.	yes	evolve
INDIA	TOI	Bharat Biotech's Covaxin too gets nod for emergency use	2021-01-03	After	"Such vaccines are generally active against any strain and are effective even if the virus mutates (such as the UK strain) because it targets the whole virus and not just any particular strain."	no	mutate
UK	Sun	Lions in the sand for tour	2021-01-03	After	But the coronavirus, which has seen a new variant emerge from England and South Africa, has cast doubt on the trip.	no	emerge
INDIA	TOI	Night curfew in 13 Rajasthan districts extended till January 15	2021-01-04	After	"Accordingly, after taking into account the prevailing outbreak scenario in the state, and the fresh surge in cases globally, particularly the emergence of a new variant of the virus in the UK, the guidelines are being issued for maintaining caution and strict surveillance in the state..."	no	emerge
INDIA	Hindu	Coronavirus | India approves COVID-19 vaccines Covishield and Covaxin for emergency use	2021-01-04	After	So this is potentially more effective against mutant strains.	no	mutate
NIGERIA	Punch	I spent last Christmas at isolation centre, Covid is real —Ali Baba	2021-01-04	After	Please, be aware the next wave of Covid , the new strain that is around now is deadlier than the one that came before because it mutated.	no	mutate
USA	WSJ	World News: Johnson Imposes Third Lockdown as New Strain Spreads	2021-01-05	After	A study by Imperial College London found the new mutated variant of the coronavirus increases the R number -- or the number of people on average every person with the infection goes on to infect -- by 0.4 to 0.7.	no	mutate
UK	Daily Mail	IT'S BACK TO SQUARE ONE	2021-01-05	After	the tier strategy had been working until the emergence last month of a strain of the virus that spreads up to 70 per cent faster	no	emerge
INDIA	TOI	State's health experts look forward to Covid vaccine with hope	2021-01-05	After	"Meanwhile, a few doctors and public health experts remained intrigued over the new strain which has emerged in the UK and said if the virus continues to mutate then it might be a challenge for all of us."	no	emerge
INDIA	TOI	State's health experts look forward to Covid vaccine with hope	2021-01-05	After	"Meanwhile, a few doctors and public health experts remained intrigued over the new strain which has emerged in the UK and said if the virus continues to mutate then it might be a challenge for all of us."	no	mutate
CANADA	Globe and Mail	Doctors call for governments to speed up immunizations	2021-01-05	After	"The emergence of the British variant and another fast-spreading version identified in South Africa has led to a ramping up of genetic surveillance for changes to the virus in Canada."	no	emerge
INDIA	Hindu	India's growth bucks global trend: Finance Ministry review	2021-01-05	After	"This gives strength to the optimism on both health and economic fronts despite continuing surge in global cases and the potential challenge of a mutant strain," the Department of Economic Affairs said in its monthly economy review for December."	no	mutate
INDIA	TOI	Three more test positive in Delhi for mutated Covid-19 virus strain	2021-01-06	After	The number of Covid-19 cases caused by the mutated strain of SARS-CoV2 virus, which was first identified in the United Kingdom, in Delhi has touched seven.	yes	mutate
INDIA	TOI	Three more test positive in Delhi for mutated Covid-19 virus strain	2021-01-06	After	Three more people were confirmed positive for the mutated strain on Monday.	no	mutate
INDIA	TOI	Three more test positive in Delhi for mutated Covid-19 virus strain	2021-01-06	After	"Of them, seven have tested positive for the mutated virus strain."	no	mutate
INDIA	TOI	Three more test positive in Delhi for mutated Covid-19 virus strain	2021-01-06	After	Dr Suresh Kumar, the medical director of Lok Nayak Hospital, said, except one, all Covid-19 patients caused by the mutated strain are stable.	no	mutate
INDIA	TOI	Three more test positive in Delhi for mutated Covid-19 virus strain	2021-01-06	After	A virus can be called a smart or a fit virus, while through the process of evolution and mutation, it takes a form when it is capable of getting transmitted easily from one of its hosts to another.	yes	evolve
INDIA	TOI	Three more test positive in Delhi for mutated Covid-19 virus strain	2021-01-06	After	However, the same mutant virus also requires its host to remain alive so that it can survive on the host and more specifically the living cells of its host that the virus attaches to and enters," Dr Nanda said, while speaking about the evolution of the coronavirus that causes Covid-19 in a talk organised by HEAL foundation	yes	evolve
CANADA	Globe and Mail	Air Canada hires social influencers to promote travel during pandemic	2021-01-06	After	"Lorne Wiesenfeld, vice-dean of postgraduate medical education at the University of Ottawa's medical school, said it is unwise to travel, especially since two COVID-19 variants emerged that are highly transmissible."	no	emerge
UK	Sun	FLIGHTING TALK;CURBS ON ARRIVALS..AS HOOPS FACE DUBAI FLAK Moves to stop bug-hit travellers getting in UK	2021-01-06	After	no need for testing or quarantine on their return ? meant it was "always likely" the virus would eventually mutate.	no	mutate
AUS	Age	Australian Grand Prix date again in doubt	2021-01-06	After	"coupled with global fears over the emergence of a new strain of COVID-19"	no	emerge
CANADA	Star	It's going to get worse than it is right now';Hospitals try to stretch ICU capacity as cases skyrocket in Ontario	2021-01-06	After	The new mutated variant of the coronavirus, dubbed B.1.1.7, which is "almost certainly more transmissible, will impact the spread, especially if it is pervasive in the community, which is not yet known, and that coincides with holiday gatherings,"	no	mutate
AUS	SMH	National lockdown, again, as cases surge	2021-01-06	After	Britain's packed hospitals are three weeks away from being overwhelmed as a mutated coronavirus strain fuels a record-breaking surge in cases and triggers a third national lockdown.	no	mutate
INDIA	TOI	Vax row: PM's intervention sought	2021-01-07	After	"Gehlot also said cases of new coronavirus strain (that has emerged in the United Kingdom) are increasing in India, adding that the Centre should reconsider its decision to resume flights from Britain from January 8."	no	emerge
INDIA	TOI	5-yr-old boy among 3 who tested +ve for UK strain	2021-01-07	After	"Among three persons who tested positive for the mutated Covid strain in Sriganganagar is a five-year-old boy who had returned from the UK on December 19."	no	mutate
INDIA	TOI	5-yr-old boy among 3 who tested +ve for UK strain	2021-01-07	After	"Besides, he said all the three persons who tested positive for the UK's mutated strain are asymptomatic as they do not have fever or other symptoms."	no	mutate
INDIA	TOI	5-yr-old boy among 3 who tested +ve for UK strain	2021-01-07	After	"In Jaipur, where highest number of persons in the state reached from the UK in November and December, no person has tested positive for the mutated strain."	no	mutate
INDIA	TOI	5-yr-old boy among 3 who tested +ve for UK strain	2021-01-07	After	"The Centre had sent us list of 333 persons who returned from the UK in November and December. So far not a single person has tested positive for mutated UK strain," said Dr Narrottam Sharma, chief medical health officier, Jaipur.	no	mutate
INDIA	Hindu	Extend ban on U.K. flights till January 31: Arvind Kejriwal	2021-01-07	After	"India had suspended all passenger flights connecting the two countries from December 23 to January 7 as a new and more contagious variant of the coronavirus emerged in the U.K."	no	emerge
UK	Sun	We are in a battle against a deadly and ever changing virus.. we must stay at home';COVID-19 PANDEMIC GOVT'S PLEA AS NATION'S CASES SOAR	2021-01-07	After	"We are in a battle against a deadly and ever changing virus, the lockdown we are introducing today is designed to reflect that stark reality."	no	change
USA	NYT	False Reports of a New ‘U.S. Variant’ Came from White House Task Force	2021-01-08	After	“Based on scientific understanding of viruses, it is highly likely there are many variants evolving simultaneously across the globe,”	yes	evolve
INDIA	TOI	Eight of 20 patients at Delhi's Lok Nayak Hospital test +ve for UK strain	2021-01-08	After	"Nearly one in every two Covid patients in Delhi, who have a history of travel to the UK or direct contact with the returnees, have been found to have mutated strain of SARS-CoV-2.According to data shared by Lok Nayak Hospital, where 51 such Covid-19 patients are kept in isolation, the genome sequencing results of 20 have arrived."	no	mutate
INDIA	TOI	Eight of 20 patients at Delhi's Lok Nayak Hospital test +ve for UK strain	2021-01-08	After	"Of the 20 Covid-19 patients, nine have tested positive for the mutated strain of the virus, which was first identified in the UK in September and is known to be highly infectious."	no	mutate
INDIA	TOI	Eight of 20 patients at Delhi's Lok Nayak Hospital test +ve for UK strain	2021-01-08	After	"The other 11 patients have tested negative for the mutated strain," a senior doctor at the hospital said.	no	mutate
INDIA	TOI	Eight of 20 patients at Delhi's Lok Nayak Hospital test +ve for UK strain	2021-01-08	After	He added that at least one patient with the mutated strain had severe symptoms necessitating oxygen therapy on intermittent basis.	no	mutate
INDIA	TOI	Eight of 20 patients at Delhi's Lok Nayak Hospital test +ve for UK strain	2021-01-08	After	"Since the beginning of the pandemic, experts say, the novel coronavirus that causes the infection has undergone multiple mutations. But the mutation found in the UK in September for the first time has become a cause of concern because it is more infectious than the original strain."	no	mutate
INDIA	TOI	Eight of 20 patients at Delhi's Lok Nayak Hospital test +ve for UK strain	2021-01-08	After	"However, when a virus circulates unchecked and immunisation rates are low, the probability of mutations increase, Kang has warned in a webinar at AIIMS, calling for early identification of mutations and mitigation strategies."	no	mutate
INDIA	Hindu	Passenger flights from U.K. to India resumes services	2021-01-08	After	"India had suspended all passenger flights between the UK and India from December 23 to January 7 as a new variant of coronavirus emerged in the U.K.."	no	emerge
INDIA	Hindu	Passenger flights from U.K. to India resumes services	2021-01-08	After	"Passenger flights resumed from the U.K. to India in limited numbers from Friday onwards after remaining suspended for 16 days due to the emergence of a new coronavirus variant in that country."	no	emerge
AUS	Age	Mutant virus detected in state's second wave;exclusive	2021-01-08	After	"However, the studies, which are not yet published or peer reviewed, suggest the variant seen in Victoria, and others that have since emerged in Britain and South Africa, will probably be covered by current vaccines"	no	emerge
AUS	Age	Mutant virus detected in state's second wave;exclusive	2021-01-08	After	"A second variant, 501.V2, emerged independently in South Africa at about the same time with similar mutations"	no	emerge
AUS	Age	Mutant virus detected in state's second wave;exclusive	2021-01-08	After	"The British variant, known as B.1.1.7, emerged in September and appears to sport an unusually large number of changes to its genetic code."	no	emerge
NIGERIA	The Nation	Pfizer COVID-19 vaccine likely to work against new variants - Study	2021-01-08	After	Since the emergence of these new variants, scientists have expressed confidence that currently authorized vaccines would work against them	no	emerge
USA	NYT	Coronavirus Update: [Foreign Desk]	2021-01-09	After	"They found that the mutant virus could not infect human cells mixed with antibodies from people who had been vaccinated."	no	mutate
INDIA	TOI	One suspected patient 'tests -ve' for UK mutated variant of Covid-19	2021-01-09	After	"One of the five suspected patients admitted in the special ward of Government Medical College and Hospital (GMCH) has reportedly tested negative in genome sequencing for UK mutated variant of Covid-19."	no	mutate
INDIA	TOI	One suspected patient 'tests -ve' for UK mutated variant of Covid-19	2021-01-09	After	"Municipal commissioner Radhakrishnan B will hold a meeting of Urban Task Force at 1pm on Friday to decide on discharge of four suspected patients of UK mutated variant."	no	mutate
INDIA	TOI	Deaths in Maharashtra rise even as fresh Covid cases keep dropping	2021-01-09	After	"The state now has 11 with the mutated strain."	no	mutate
INDIA	TOI	Two patients with UK strain test negative	2021-01-09	After	"The two known cases of the mutated strain of Covid-19 in the state - a UK returnee and a contact of the returnee - have both recovered and have been discharged from hospital."	no	mutate
INDIA	TOI	Kerala, 2 other states account for 50% of new Covid cases	2021-01-09	After	particularly in the light of the spread of the mutated strain of the virus that's said to be more infectious	no	mutate
AUS	Age	Game changer': World braced for march of mutating virus	2021-01-09	After	"The emergence of more contagious variants of the virus that causes COVID-19 has experts calling for Australians to keep their guard up with strong border defences and strict infection control measures"	no	emerge
AUS	Age	Game changer': World braced for march of mutating virus	2021-01-09	After	"There are also concerns about a similarly virulent strain that has emerged in South Africa"	no	emerge
AUS	Age	Game changer': World braced for march of mutating virus	2021-01-09	After	"The emergence of the mutant strains reinforced the need for diligent infection control both in the quarantine system and among the public, he said."	no	emerge
AUS	SMH	Vigilance 'key in fight against rogue variants';New Threat	2021-01-09	After	The emergence of more contagious variants of the virus that causes COVID-19 has experts calling for Australians to keep their guard up with strong border defences and strict infection control measures.	no	emerge
AUS	SMH	Vigilance 'key in fight against rogue variants';New Threat	2021-01-09	After	There are also concerns about a virulent strain that emerged in South Africa.	no	emerge
AUS	SMH	Vigilance 'key in fight against rogue variants';New Threat	2021-01-09	After	The emergence of the mutant strains reinforced the ongoing need for diligent infection control in the quarantine system and among the public.	no	emerge
USA	NYT	Keeping Track of Covid-19, and the Cat: [Correction]	2021-01-10	After	"The clinic continues to follow shifts or evolutions of viral strains, according to Dr. Sterling, "	yes	evolve
GUYANA	Kaieteur	Coronavirus: The more we facilitate its spread, the more mutations we will have	2021-01-10	After	s you may know, there has been recent evidence of mutated strains of the coronavirus (Sarscov2) appearing in the UK and South Africa.	no	appear
GUYANA	Kaieteur	Coronavirus: The more we facilitate its spread, the more mutations we will have	2021-01-10	After	These are not the first set of mutated strains from the virus; scientists have already discovered more than 20 mutated strains and expect more to occur as the virus continues to spread.	no	occur
GUYANA	Kaieteur	Coronavirus: The more we facilitate its spread, the more mutations we will have	2021-01-10	After	Viruses tend to mutate as they jump from host to host.	no	mutate
GUYANA	Kaieteur	Coronavirus: The more we facilitate its spread, the more mutations we will have	2021-01-10	After	The more hosts they infect means the longer they will be around and the likelier they will change their structure and thereby mutate.	no	mutate
GUYANA	Kaieteur	Coronavirus: The more we facilitate its spread, the more mutations we will have	2021-01-10	After	The biggest worry is that if we continue to be reckless and allow this virus to spread, it will mutate faster and become like the flu virus, which cannot be eradicated, and new vaccines have to be developed every year to keep up with it.	no	mutate
GUYANA	Kaieteur	Coronavirus: The more we facilitate its spread, the more mutations we will have	2021-01-10	After	We obviously do not want to have a situation where this virus cannot be eradicated because it is mutating faster than we can vaccinate to control its spread.	no	mutate
GUYANA	Kaieteur	Coronavirus: The more we facilitate its spread, the more mutations we will have	2021-01-10	After	The best way to keep the mutation under control is to avoid the spread of the virus.	no	mutate
INDIA	Hindu	Coronavirus | IMA endorses safety, efficacy of both vaccines cleared by India	2021-01-11	After	"Good protective levels of antibodies have been found to develop with our vaccines against current strain and new mutated strains."	no	mutate
USA	WSJ	Maximize the Vaccine	2021-01-13	After	Interestingly, though scientists aren't sure whether natural or artificial vaccination confers better immunity, they're pretty sure the natural kind will prove more robust against evolution because it responds to a broader diversity of virus features.	yes	evolve
INDIA	TOI	386 new Covid cases, 16 more deaths in Delhi	2021-01-14	After	We have 16 patients suffering from infection caused by the mutated strain.	no	mutate
UK	Daily Mail	STILL THEY FLY IN	2021-01-15	After	Passengers from Brazil and South Africa, where two worrying mutant virus strains have emerged, told how they were able to waltz through border controls yesterday without facing a single question.	no	emerge
UK	Sun	COPACABANA;FRESH CURBS AIMED AT HALTING DEADLY VIRUS Travel ban on Portugal & South America Sparked by fears on new Brazil strain	2021-01-15	After	"Government scientist Sir Patrick Vallance warned the mutant Brazilian variant ? thought to have emerged in the Covid-ravaged Amazonian city of Manaus ? could be immune to vaccines"	no	emerge
UK	Sun	COPACABANA;FRESH CURBS AIMED AT HALTING DEADLY VIRUS Travel ban on Portugal & South America Sparked by fears on new Brazil strain	2021-01-15	After	"The virus is likely to bounce around the world potentially producing new variants for some time."	no	produce
GUYANA	Guyana Chronicle	UK bans travel from Guyana, other South American countries	2021-01-15	After	"According to the BBC, it is not unexpected that new variants have developed since all viruses mutate as they make new copies of themselves to spread and thrive"	no	develop
USA	NYT	One Year Into Pandemic, Coronavirus Deaths Pass Two Million Worldwide: [Foreign Desk]	2021-01-16	After	"scientists have cautioned that this may not always be the case as the virus continues to mutate.	no	mutate
INDIA	TOI	Expecting pandemic to end with vaccine roll out is too optimistic an assumption'	2021-01-18	After	As per the latest information-based whole genome sequencing, epidemiology and modelling, the mutant threat which has emerged in the UK has altered the 'transmissibility' of the virus.	no	emerge
USA	NYT	Since One Mask Is Good, Would Two Be Better?: [Science Desk]	2021-01-19	After	"New variants of the virus have emerged, carrying genetic changes"	no	emerge
USA	NYT	What You Can Do to Avoid the New Coronavirus Variant Right Now	2021-01-20	After	"New variants of the coronavirus continue to emerge."	no	emerge
USA	NYT	What You Can Do to Avoid the New Coronavirus Variant Right Now	2021-01-20	After	"Experts are cautiously optimistic that the current generation of vaccines will be mostly effective against the emerging coronavirus variants."	no	emerge
USA	NYT	What You Can Do to Avoid the New Coronavirus Variant Right Now	2021-01-20	After	"New variants of the coronavirus continue to emerge but one in particular has caused concern in the U.S. because it’s so contagious and spreading fast."	no	emerge
CANADA	Star	Sudbury officials keep an eye on COVID-19 variant	2021-01-20	After	"The flu virus mutates often, and sometimes it mutates within the same season. There are also several thousands of variants of the influenza virus. There are so many mutations that it actually changes the behaviour of the virus," she said.	no	mutate
INDIA	Hindu	U.K. will take measures to attract students, skilled labour'	2021-01-22	After	"Though the emergence of new variants of the virus is certain, our scientists will be ahead of the game, [British Deputy High Commissioner to Karnataka and Kerala, Jeremy Pilmore-Bedford] said."	no	emerge
UK	Sun	American toll higher than WWII	2021-01-22	After	"The announcement came as the WHO confirmed that the virus variant first detected in the UK had spread to over 60 countries, while one that emerged in South Africa has made it to 23"	no	emerge
USA	NYT	U.K. Variant May Be Deadlier, Johnson Warns: [Foreign Desk]	2021-01-23	After	"a race between vaccinating the public and confronting mutations in the virus"	no	mutate
USA	NYT	U.S. Passes 25 Million Confirmed Coronavirus Cases	2021-01-23	After	"the more viruses spread, the more opportunities they have to mutate."	no	mutate
UK	Sun	UK's strain 'could be more fatal'	2021-01-23	After	"However he said there was less certainty about the vaccines' efficacy against those which had appeared in Brazil and South Africa"	no	appear
CANADA	Star	Modelling predicts nearly 4,000 daily cases;Data show new variant, school reopenings could spike infection numbers	2021-01-24	After	He noted that while the B117 variant is estimated to be about 56 per cent more transmissible than the regular variant, based on British data, "a virus can actually mutate according to its local conditions,"	no	mutate
USA	NYT	Britain's Alarm Over Virus Variant Bolsters the Case for a Lockdown: [Foreign Desk]	2021-01-25	After	"The disclosure reflected fast-changing thinking among infectious disease experts about the potential for mutations to change the path of the virus"	no	change
INDIA	TOI	UK, Brazil, SA returnees must pass through careful checks: Task force	2021-01-25	After	Based on the mutations the variant has acquired (at least 10), scientists have said it's likely to be more infectious, just like strains identified in the UK and South Africa have proven to be.	no	acquire
CANADA	Globe and Mail	Expert warns against hoarding vaccines	2021-01-25	After	"The emergence of new variants also creates worries, given the uncertainty over how much protection existing vaccines will provide as the virus continues to mutate."	no	emerge
UK	Sun	BREAK AT THE BORDER;COVID-19 PANDEMIC PUSH FOR ZERO COVID IRELAND STRATEGY Labour calling for Army at checkpoints Vaccines rollout is hit by factory delays	2021-01-25	After	"claimed there are serious concerns that the jabs may not be as effective against new variants popping up across the globe"	no	pop up
USA	NYT	Biden Vows to Reopen Classrooms Quickly. It Will Not Be Easy.: [Foreign Desk]	2021-01-26	After	"case counts across the country and new variants of the coronavirus emerging.."	no	emerge
INDIA	TOI	Virus is getting smarter, will our vaccines work?	2021-01-26	After	There's a growing view that some recent mutations in the coronavirus might be helping it not only spread faster but also reinfect people who have had Covid-19	no	mutate
UK	Sun	Get jabs plan right and soon	2021-01-26	After	"It was a pre-emptive strike against the new, more-transmissible strain that had emerged in south-east England"	no	emerge
USA	NYT	Coronavirus Update: [Foreign Desk]	2021-01-27	After	"Much depends on the outcome of this race between a mutating virus and vaccines"	no	mutate
UK	Daily Mail	IMF: RECOVERY WILL TAKE LONGER	2021-01-27	After	"The US and China are expected to lead the world recovery but the IMF fears new waves of infections and the emergence of variants"	no	emerge
CANADA	Globe and Mail	School officials in hot spots express concern over lack of transparency on return to classrooms	2021-01-27	After	" It is unclear how the emergence of a new more-contagious variant of the virus will affect schools, he said."	no	emerge
INDIA	TOI	Vaccinate fast, or the virus will become deadlier	2021-01-28	After	The coronavirus is mutating in ways that let it spread easily.	no	mutate
INDIA	TOI	Vaccinate fast, or the virus will become deadlier	2021-01-28	After	The sudden emergence of three deadly variants at the end of 2020 raises the question, why now?	no	emerge
INDIA	TOI	Vaccinate fast, or the virus will become deadlier	2021-01-28	After	The three mutants are bad news but if the virus continues to spread fast, there will be many more, and "there's no reason to believe that it won't become more efficient over time,"	no	become
CANADA	Star	Canada not adopting two-mask advice;Officials in U.S., Europe are now telling residents to double up on layers	2021-01-28	After	Officials said that as new variants emerge, medical masks offer greater protection.	no	emerge
AUS	SMH	Here's the rub on the COVID jab	2021-01-28	After	Given the continued emergence of new strains of the virus, the risk of importing infections may be with us for many years to come.	no	emerge
UK	Daily Mail	ANOTHER SHOT IN THE ARM FOR BRITAIN!	2021-01-29	After	"The trial is the first to be completed since the emergence of the new variant of the disease in Kent. Preliminary analysis suggests the vaccine was 85.6 per cent effective against this mutation."	no	emerge
UK	Daily Mail	ANOTHER SHOT IN THE ARM FOR BRITAIN!	2021-01-29	After	"A separate Novavax trial in South Africa found the vaccine was only 49.4 per cent effective against the dangerous new variant which has emerged there"	no	emerge
INDIA	Hindu	Coronavirus | Novavax vaccine, to be made by SII, shows 89% efficacy in U.K.	2021-01-29	After	Since December, scientists have raised concerns over mutated variants of the coronavirus, particularly those isolated in the U.K., South Africa and Brazil that harbour changes, allowing the virus to cheat the immune system.	no	mutate
AUS	Age	No-exemption quarantine for returning residents	2021-01-29	After	"Britain is trying to curb a mutated variant of COVID-19 that was detected before Christmas and is between 30 to 70 per cent more transmissible.	no	mutate
AUS	Age	No-exemption quarantine for returning residents	2021-01-29	After	"The Prime Minister said concerns about new variants that had emerged in Brazil and South Africa meant that a move to enforced quarantine was now necessary"	no	emerge
USA	NYT	Coronavirus Update: [Foreign Desk]	2021-01-30	After	" mutations would continue as the virus evolved"	yes	evolve
USA	NYT	Which Version Is Best? Anything You Can Get To Limit Severe Illness: [Foreign Desk]	2021-01-30	After	"the virus is evolving quickly "	yes	evolve
USA	WSJ	World News: World Watch	2021-01-30	After	If confirmed by other vaccine trials under way in South Africa, the finding that people who have already had Covid-19 can get infected again by a new variant could have important repercussions for the world's fight against the pandemic. It suggests that reaching herd immunity through natural infection may be difficult if the virus mutates in ways that allow it to evade the human immune response.	no	mutate
USA	WSJ	U.S. News: New Vaccine: How It Works, Differs	2021-01-30	After	And the timing of the testing might have played a role, as J&J's took place while new coronavirus variants emerged.	no	emerge
INDIA	TOI	Why the West is ditching cloth masks, nose swabs	2021-01-30	After	they might be more important now because of the new risk from mutant viruses that spread faster, evade antibodies in people who have already had Covid, and also make vaccines less effective	no	mutate
INDIA	TOI	Why the West is ditching cloth masks, nose swabs	2021-01-30	After	If the virus becomes more dangerous, the mask has to get better.	no	become
CANADA	Globe and Mail	Four ETFs for confused investors;OPINION	2021-02-02	After	"The coronavirus is still with us today, and some experts are saying it may become a reality we need to live with for years, as it morphs into new variants."	no	morph
UK	Sun	TEST & CHASE;URGENT DOOR-TO-DOOR R BLITZ TO HALT MUTATION S Africa bug in 8 areas	2021-02-02	After	"A mutation in one part of the world is a threat to people everywhere."	no	mutate
AUS	Age	Scientists fear variant may affect vaccines	2021-02-02	After	"He said the results suggested the virus could mutate in ways that made antibodies and vaccines less effective"	no	mutate
CANADA	Star	Worst pandemic month in U.S. ends with hope;COVID-19 cases moving down, while vaccination numbers are picking up	2021-02-02	After	Three mutated variants of the virus from Britain, South Africa and Brazil have been detected in the U.S.	no	mutate
USA	WSJ	World News: U.K. Mutation Resists Vaccine	2021-02-03	After	The continued emergence of new variants could make it harder to curb the pandemic and suggests that vaccines will need to regularly update to take account of changes to the virus.	no	emerge
USA	WSJ	World News: U.K. Mutation Resists Vaccine	2021-02-03	After	""Existing variants of concern will increasingly acquire new mutations,"	no	acquire
USA	WSJ	World News: U.K. Mutation Resists Vaccine	2021-02-03	After	"Both in South Africa and Brazil, variants with the E484K mutation emerged in regions that suffered some of the highest numbers of Covid-19 cases during the countries' first waves of infections."	no	emerge
UK	Daily Mail	THE OXFORD JAB GAME-CHANGER	2021-02-03	After	"Britain was facing a new threat after the two main virus strains developed the same dangerous mutation found in the South African variant"	no	develop
CANADA	Globe and Mail	Canada to start domestic production months after vaccine deadline	2021-02-03	After	"The emergence of variants is a reminder that a soft landing isn't assured,"	no	emerge
AUS	Age	Testing goes door to door in virus fight	2021-02-03	After	"as well as trying to keep out other more transmissible variants that have emerged in countries with major outbreaks, including Brazil and South Africa"	no	emerge
USA	WSJ	World News: U.K. Vaccine Drive Shows Promise	2021-02-04	After	Adding to the uncertainty is the emergence of new Covid-19 variants that might have some resistance to existing vaccines.	no	emerge
CANADA	Globe and Mail	What you need to know about the latest medical guidance on mask-wearing	2021-02-04	After	have recently called on their citizens to wear medical masks instead of reusable cloth ones, in light of the emergence of more contagious variants of the coronavirus	no	emerge
INDIA	Hindu	ICMR survey finds one in five Indians have been exposed to coronavirus	2021-02-04	After	The survey also doesn't account for the possibility of reinfection, or whether we will be more vulnerable to mutant strains	no	mutate
UK	Sun	Inside the mutant 'mind' of Covid-19;HOW NEW VIRUS STRAINS ARE DOWN TO ITS OWN EVOLUTIONARY FIGHT FOR LIFE	2021-02-05	After	"One of the things people find hardest to grasp about evolution is that it appears purposeful but the mutations on which it feeds are random"	yes	evolve
UK	Sun	Inside the mutant 'mind' of Covid-19;HOW NEW VIRUS STRAINS ARE DOWN TO ITS OWN EVOLUTIONARY FIGHT FOR LIFE	2021-02-05	After	"The champions of Darwinian medicine have been calling for their colleagues to take evolution and adaptation more into account for years, and one of them, Paul Ewald of the University of Louisville, in the US, has something very relevant to say about this pandemic."	yes	evolve
UK	Sun	Inside the mutant 'mind' of Covid-19;HOW NEW VIRUS STRAINS ARE DOWN TO ITS OWN EVOLUTIONARY FIGHT FOR LIFE	2021-02-05	After	"There are lots of possible explanations, but because lockdowns have been mostly ineffective in India, could it be that mild variants have done well and an attendant-borne evolution to greater virulence has not happened"	yes	evolve
UK	Sun	Inside the mutant 'mind' of Covid-19;HOW NEW VIRUS STRAINS ARE DOWN TO ITS OWN EVOLUTIONARY FIGHT FOR LIFE	2021-02-05	After	"But I do know that evolution is about more than mutation"	yes	evolve
CANADA	Star	Testing reveals spread of virus variants;More than 100 cases found in day's worth of samples, many tied to Barrie outbreak	2021-02-05	After	"There is the likelihood that there will be other mutations and other variants that will emerge over time," she said,	no	emerge
CANADA	Star	Eighty-one deaths later, outbreak declared over	2021-02-06	After	While infection case numbers are falling at long-term-care homes, reflecting the general province-wide trend, the virus mutates, its more recent versions even more rapacious, an ever-looming threat.	no	mutate
USA	WSJ	Virus Likely to Stay After Crisis Fades	2021-02-08	After	"The ease with which the coronavirus spreads, the emergence of new strains and poor access to vaccines in large parts of the world mean Covid-19 could shift from a pandemic disease to an endemic one..."	no	emerge
USA	WSJ	Virus Likely to Stay After Crisis Fades	2021-02-08	After	"The findings contribute to concerns that a mutating virus is rendering existing Covid-19 vaccines less effective."	no	mutate
UK	Daily Mail	VACCINES MUST REACH EVERY CORNER OF SOCIETY	2021-02-08	After	"But it does show this constantly mutating virus is not going away any time soon - so we must learn to live with it"	no	mutate
CANADA	Globe and Mail	How genome science guides province's pandemic response	2021-02-08	After	"Sequencing allows scientists to identify where the virus is coming from, how it is spreading and when it is mutating."	no	mutate
CANADA	Globe and Mail	How genome science guides province's pandemic response	2021-02-08	After	"Even as B.C. hopes to have most adults vaccinated by the fall, she said her team will still be monitoring to see if people are still at risk as the virus continues to mutate."	no	mutate
USA	NYT	As a Variant Outruns Vaccines, a Warning For the World Surfaces: [Foreign Desk]	2021-02-09	After	"As quickly as scientists developed vaccines, the virus has seemed to evolve even more quickly. "	yes	evolve
UK	Sun	Don't let variants distract from facts: Vaccines save lives;EXPERTS SAY JAB IS OUR BEST SHOT	2021-02-09	After	By tracking how the virus evolves, we are using genomics to detect and respond to its every move.	yes	evolve
UK	Sun	Don't let variants distract from facts: Vaccines save lives;EXPERTS SAY JAB IS OUR BEST SHOT	2021-02-09	After	Must stay alert And as new variants emerge, scientists can develop newer generations of vaccines, similar to the work done every year on the flu."	no	emerge
UK	Sun	Don't let variants distract from facts: Vaccines save lives;EXPERTS SAY JAB IS OUR BEST SHOT	2021-02-09	After	"But for understandable reasons, talk in recent days of mutations and new variants ? each identified in a different location ? has caused alarm"	no	mutate
CANADA	Star	Cancelling March break no easy decision;Students, staff need to recharge, but travel, gatherings are concerns	2021-02-09	After	"Given the emergence of these new variants, we need to continue to stay vigilant to keep our schools safe and continue the downward trend of transmission across the province."	no	emerge
UK	Daily Mail	THIS STAIN OF SHAME TARNISHES THE MET	2021-02-10	After	"And when exactly will we emerge from this hermit-like existence? The virus will always mutate, so by that logic we must be locked down for ever."	no	mutate
UK	Sun	Two new variants detected	2021-02-10	After	"It has developed from the Kent variant with an E484K mutation, which means it can evade vaccines more easily"	no	develop
USA	NYT	Tighten Masks Or Double Up, C.D.C. Warns: [Correction]	2021-02-11	After	"We need to up our game to slow the spread of the virus and slow its evolution."	yes	evolve
NIGERIA	The Nation	Africa's COVID-19 deaths rose by 40 percent in January - WHO	2021-02-11	After	New variants are likely to emerge as the virus continues to spread so preventive measures must be maintained even as Africa gears up to start vaccinations against the virus.	no	emerge
CANADA	Globe and Mail	We're sleepwalking into a brutal third wave;OPINION	2021-02-12	After	"Reopening of schools and economies without meaningful improvements in surveillance or containment is set to intersect with emerging variants of concern and vaccine shortages, creating a perfect storm for a massive third wave."	no	emerge
CANADA	Globe and Mail	MANITOBA COMMITS TO BUYING TWO MILLION DOSES OF PROSPECTIVE CANADIAN VACCINE	2021-02-12	After	"By trying to get your country served earlier, you cause an uneven and delayed international vaccination that will accelerate the rise of mutant variants and make the disease hit your country and its economy harder."	no	rise
AUS	Age	CSL confident it can cover variants with its vaccine	2021-02-12	After	"leading some scientists to raise concerns it may not be possible to boost the AstraZeneca vaccine, if a booster is needed to cover emerging variants"	no	emerge
CANADA	Globe and Mail	The 'me first' spirit of vaccine nationalism isn't just selfish. It's self-harm;OPINION	2021-02-13	After	"By trying to get your country served earlier, you cause an uneven and delayed international vaccination that will accelerate the rise of mutant variants and make the disease hit your country and its economy harder."	no	rise
CANADA	Star	B.1.1.7 variant cases growing quickly;More aggressive strain will become dominant in Ontario, experts warn	2021-02-13	After	"Once we get on top of (the virus) or it mutates itself out of being virulent - causing disease - then we can stop worrying about it.	no	mutate
USA	NYT	When Can We Have House Guests Again?: [Correction]	2021-02-14	After	"gives the virus the opportunity to continue to mutate,"	no	mutate
USA	NYT	7 Virus Variants Found in U.S. Carrying the Same Mutation	2021-02-14	After	"many of these variants seem to be evolving in the same direction "	yes	evolve
USA	NYT	7 Virus Variants Found in U.S. Carrying the Same Mutation	2021-02-14	After	All of them have evolved a mutation in the same genetic letter.	yes	evolve
USA	NYT	7 Virus Variants Found in U.S. Carrying the Same Mutation	2021-02-14	After	I think there’s a clear signature of an evolutionary benefit,	yes	evolve
USA	NYT	7 Virus Variants Found in U.S. Carrying the Same Mutation	2021-02-14	After	Convergent evolution has transformed a few other spots on the spike protein as well.	yes	evolve
UK	Sun	WHAT A LOAD OF STALLS;Profs' schools return clash Rate fall will 'open' classes	2021-02-14	After	"The virus has adapted via new variants and it's more likely that one infected person will pass it onto another."	no	adapt
UK	Sun	Do vaccine passports only work in fantasyland?;Planet Heather 3 PAGES OF HOLS WITH SCOTTISH SUN TRAVEL EDITOR HEATHER EXPERTS ARGUE FOR AND AGAINST JAB DOCUMENT	2021-02-14	After	"Even scarier than that is when they become vaccine resistant"	no	become
CANADA	Globe and Mail	Canada's slow shift to domestic vaccine capacity;ANALYSIS	2021-02-15	After	"Already, the virus has already generated thousands of mutations, including some variants of concern."	no	generate
AUS	Age	Survival plea over overseas students	2021-02-15	After	"will also return to previous levels today after being cut by half in January following the emergence of the highly contagious UK strain"	no	emerge
CANADA	Star	Vaccinated? It's best to keep behaving like you're not;Families will have to navigate what it means when only one person has been immunized	2021-02-15	After	there's nothing worth taking a chance over, especially with the emergence of the variants	no	emerge
AUS	SMH	Experts split on source of outbreak	2021-02-15	After	""It's simply the fact we need to acknowledge that [the virus] is not a static enemy. It is wicked and it is changing.""	no	change
UK	Daily Mail	STAY AT HOME' MESSAGE WILL BE SHOWN THE DOOR	2021-02-16	After	"I can't give that guarantee, of course not, because we are battling with nature, with a disease that is capable of mutating and changing"	no	change
INDIA	TOI	A new Covid order is rising: All you need to know	2021-02-16	After	Vaccines will also be less effective at reducing transmission of the virus between people, and they will need to be updated eventually as future mutations change the virus beyond recognition	no	change
USA	WSJ	World News: Variants Outpace EU's Vaccine Rollout	2021-02-17	After	Authorities must remain cautious because the more people get infected, the higher the likelihood is that new variants can emerge that could put even people who have been vaccinated at risk, Prime Minister Boris Johnson said Monday.	no	emerge
USA	WSJ	World News: Variants Outpace EU's Vaccine Rollout	2021-02-17	After	"shortage of vaccines in the European Union -- only 4.8% of Europeans have been vaccinated since late December -- means the continent hasn't even started the race against virus mutations that many experts say will define health policy in coming months and years."	no	mutate
CANADA	Globe and Mail	Ontario's new virus math doesn't add up	2021-02-17	After	"All else equal, it might be possible to consider easing. But all else isn't equal: New variants of the virus have arrived, and they are much more infectious."	no	arrive
INDIA	Hindu	Coronavirus | Four cases of South Africa variant of virus found	2021-02-17	After	Earlier this month, one case of the Brazilian variant, which emerged independently in that country in early January, was reported in India.	no	emerge
INDIA	Hindu	Coronavirus | Four cases of South Africa variant of virus found	2021-02-17	After	He added that the UK strain which emerged in September 2020 has so far spread to 86 countries including India.	no	emerge
CANADA	Star	Drop in cases is only part of the issue;Experts concerned over increasing number of variant-linked positives	2021-02-17	After	but also for B.1.351, a strain that emerged in South Africa	no	emerge
USA	NYT	Coronavirus Update: [Foreign Desk]	2021-02-18	After	"genetic sequencing needed to identify new virus variants as they emerge"	no	emerge
USA	WSJ	We'll Have Herd Immunity by April	2021-02-19	After	"But countries where new variants have emerged, such as the U.K., South Africa and Brazil, are also seeing significant declines in daily new cases."	no	emerge
USA	WSJ	We'll Have Herd Immunity by April	2021-02-19	After	"The risk of new variants mutating around the prior vaccinated or natural immunity should be a reminder that Covid-19 will persist for decades after the pandemic is over. "	no	mutate
UK	Sun	Minister Foley's failing science in her school test	2021-02-19	After	"The difference between the first two waves and now, of course, is the arrival on the scene of the B117 British variant ? and the threat of others to boot"	no	arrive
INDIA	TOI	Signs Of A Win, But Delhi Can't Let Its Guard Down	2021-02-20	After	The emergence of newer strains of the novel coronavirus is another concern.	no	emerge
INDIA	TOI	India host to 7,569 corona mutants: Study	2021-02-21	After	Beginning with one variant about a year ago, the novel coronavirus has turned into numerous variants.	no	turn into
USA	NYT	Virus Variant Spread Prompts E.U. Members to Rethink Open Borders: [Correction]	2021-02-22	After	"We are fighting the mutated virus on the border with the Czech"	no	mutate
INDIA	TOI	Indore: 105 samples sent to NCDC for genome sequencing	2021-02-22	After	The study will further help in decoding the possibility of change in strain, if occurred in the district	no	change
INDIA	TOI	Odisha govt rolls up sleeves to prevent Covid's return	2021-02-22	After	In view of the surge in positive cases in some states and emergence of new variants of the virus, we need to be more careful,	no	emerge
UK	Sun	SPRING BREAK;PM TO REVEAL 'CAUTIOUS' ROAD BACK TO FREEDOM lSchools begin March unlock lOutdoor pubs by mid-April	2021-02-22	After	"He will reserve the right to slam the brakes on lifting lockdown if a new variant of the virus emerges"	no	emerge
USA	NYT	No Lengthy Testing for Vaccines for Variants: [Foreign Desk]	2021-02-23	After	"pivoting as the virus adapts."	no	adapt
USA	WSJ	U.K. Vaccine Data Offer Upbeat Signs	2021-02-23	After	"Another uncertainty is whether a mutation in the coronavirus will render current vaccines ineffective."	no	mutate
INDIA	TOI	Can we avoid another coronavirus pandemic?	2021-02-23	After	A mutating virus has given rise to many variants, some of which appear to reduce vaccine efficacy	no	mutate
AUS	Age	Hopes for overseas travel this year	2021-02-23	After	"Experts say restrictions will remain if the vaccines do not end up stopping transmission of the disease to the extent expected or if variants emerge that are significantly resistant"	no	emerge
INDIA	Hindu	Number of people adhering to COVID-19 norms has fallen drastically, says survey	2021-02-24	After	"States that are seeing even a minor rise week over week must sensitise residents about wearing masks and following physical distancing norms and take timely calls on imposing localised restrictions in order to prevent further spread of COVID-19 and its mutant strains," the survey said.	no	mutate
NIGERIA	Punch	COVID-19 variant: Experts seek mass testing to prevent spread	2021-02-24	After	Recall that there was a report on February 15 that the United Kingdom had reported new cases of a variant of the coronavirus, said to have emerged from Nigeria.	no	emerge
NIGERIA	Punch	COVID-19 variant: Experts seek mass testing to prevent spread	2021-02-24	After	“When virus mutates, it means a lot, some may lose their virulence, while the rate of pathogenicity may increase. What has been documented so far is theincrease in the transmissibility, the clinical manifestation may differ.	no	mutate
USA	WSJ	U.S. News: Moderna Rolls Out Doses to Fight New Strain	2021-02-25	After	Staying ahead of an evolving virus, health experts say, could prove crucial	yes	evolve
USA	NYT	Coronavirus Update: [Foreign Desk]	2021-02-26	After	"hat will simply encourage the emergence of more dangerous variants,"	no	emerge
CANADA	Globe and Mail	Ontario officials mull lockdown for Thunder Bay as cases rise rapidly	2021-02-26	After	"However, he acknowledged that so far, the variants that first emerged in Britain, South Africa and Brazil have yet to spread as quickly in Ontario as first feared, which he said was because of the province's public-health restrictions."	no	emerge
CANADA	Star	Moderna's vaccine deals top $18 billion;Medical boss departing as CEO says its mRNA work 'just the beginning'	2021-02-26	After	Moderna also faced questions on the call about its efforts to study and develop multiple COVID-19 vaccine booster shots to protect against emerging variants	no	emerge
CANADA	Globe and Mail	Health Canada clears AstraZeneca vaccine	2021-02-27	After	"[Zhou Xing, a viral-vaccine researcher at McMaster University in Hamilton] added that despite apparent differences in efficacy, all the authorized vaccines appear to be doing a good job of preventing severe disease - an important consideration following the emergence of new, more transmissible variants of the virus."	no	emerge
CANADA	Globe and Mail	On vaccine coverage, we're working to get the dosage right;OPINION	2021-02-27	After	"While many are deeply focused on the pandemic and the vaccine, one reader made her views clear in this letter to the editor published Monday: "... I am tired of reading about how fast the virus is upgrading, and how modelling foretells a deadlier third wave. I am tired of reading about decisions to loosen restrictions. I am even more tired of hearing about vaccination delays."	no	upgrade
CANADA	Star	What to know about Canada's new vaccine;AstraZeneca shot the third to be made available in Canada	2021-02-28	After	South African officials have also raised questions about its usefulness against the variant that emerged in their country.	no	emerge
CANADA	Star	What to know about Canada's new vaccine;AstraZeneca shot the third to be made available in Canada	2021-02-28	After	However, the vaccine seems to be just fine when faced with B. 117, the variant that emerged in the U.K.	no	emerge
NIGERIA	The Nation	Sanofi, GSK start new phase 2 study of COVID-19 vaccine candidate	2021-03-01	After	GSK is also working with mRNA specialist, CureVac, to jointly develop next generation, multi-valent mRNA vaccines for COVID-19 with the potential to address multiple emerging variants in one vaccine.	no	emerge
USA	WSJ	World News: Brazil Virus Variant Overwhelms Region --- Aggressive new strain infects younger people, raises deaths, doctors and researchers warn	2021-03-03	After	The Amazonian strain, P.1, emerged in the Brazilian city of Manaus	no	emerge
UK	Daily Mail	SINGLE JAB TO BEAT MUTANTS	2021-03-03	After	"The Kent variant, which emerged in September, is now dominant in the UK" | "The nature of this virus is that it will continue to throw out new mutations in time."| "The emergence of the Brazilian variant in the UK has not altered plans to reopen schools on Monday."	no	emerge
UK	Daily Mail	SINGLE JAB TO BEAT MUTANTS	2021-03-03	After	"The nature of this virus is that it will continue to throw out new mutations in time."	no	mutate
UK	Daily Mail	SINGLE JAB TO BEAT MUTANTS	2021-03-03	After	"The emergence of the Brazilian variant in the UK has not altered plans to reopen schools on Monday."	no	emerge
CANADA	Star	Ontario eyes delayed-dose vaccinations after green light from national panel;Extending time between shots could 'provide more protection to more people,' province says	2021-03-04	After	We simply don't have enough data that tells us this is an effective strategy, particularly when we have variants of the virus that are emerging,	no	emerge
UK	Daily Mail	FAST-TRACKJABS TO BEAT THE DANGER OFVIRUS MUTATIONS	2021-03-05	After	"Some strains, including the South African and Brazilian ones, have evolved to escape immune protection from both prior infection and vaccines, rendering current doses less effective"	yes	evolve
INDIA	Hindu	Coronavirus | Half of Hyderabad, Secunderabad's population have antibodies, says study	2021-03-05	After	As things stand now, natural immunity due to COVID infection could last up to six months in most cases while the vaccine efficacy is about a year. Even later, it is possible that the body's immune memory system could handle any new infection unless its a potent mutant variant, he said.	no	mutate
CANADA	Star	Ottawa says boosters will be approved more easily;Health Canada will rely on blood tests to study antibody development	2021-03-05	After	delay in updating a vaccine, where needed, bears the risk that the virus is evolving even further, potentially making a new vaccine version outdated at the time of approval again,	yes	evolve
CANADA	Star	Ottawa says boosters will be approved more easily;Health Canada will rely on blood tests to study antibody development	2021-03-05	After	Coronaviruses don't mutate as quickly as flu viruses, but do change as they spread among people and the more they spread, the more they change.	no	mutate
CANADA	Star	Ottawa says boosters will be approved more easily;Health Canada will rely on blood tests to study antibody development	2021-03-05	After	The B.1.351 variant that first arose in South Africa is the most concerning to date in its potential to evade existing vaccines.	no	arise
UK	Sun	PFIZER IS GOOD VS MUTANT	2021-03-10	After	"Branch will calm concerns about the variant, which first emerged in the city of Manaus"	no	emerge
USA	WSJ	Coronavirus Variants Are Spreading Locally	2021-03-11	After	Viruses constantly mutate and new variants are expected	no	mutate
GUYANA	Guyana Chronicle	‘Deep South’ Rupununi COVID-free	2021-03-11	After	"According to Professor of Molecular Genetics and Virology at the University of the West Indies (UWI), St. Augustine Campus, Christine Carrington, the variants arose through accumulation of mutations (genetic changes) that can occur when viruses replicate within the cells of infected individuals."	no	arise
GUYANA	Guyana Chronicle	‘Deep South’ Rupununi COVID-free	2021-03-11	After	"Beyond just the importation of the virus, there are now concerns over the importation of variants of the virus — specifically the P1 and P2 variants that have emerged in Brazil."	no	emerge
USA	NYT	Weak Immune Systems Can Turbocharge Variants: [Foreign Desk]	2021-03-16	After	"Scientists can observe this slow evolution using a molecular "clock""	yes	evolve
UK	Daily Mail	KILLER FROM MANILA? NEW PHILIPPINES STRAIN IN UK	2021-03-17	After	"But it is interesting that these different variants from across the world are going down the same route of evolution in terms of specific changes that are affecting transmissibility and vaccine resistance"	yes	evolve
USA	WSJ	U.S. News: J&amp;amp;J Aims To Modify Doses for Variants	2021-03-19	After	"He said the need for booster shots or modified vaccines will depend on how variants evolve in the coming months"	yes	evolve
CANADA	Star	COVID closes 10 Dufferin-Peel schools;St. Sofia outbreak infects at least 15 students, staff, with three in hospital	2021-03-19	After	Given the emergence of new, more contagious variants, schools are implementing extra measures	no	emerge
GUYANA	Guyana Chronicle	Beating COVID	2021-03-20	After	"...Guyana may very well escape the brunt of the global crisis that the virus has wreaked on the world over the past year, even with the continuing threat of new variants emerging."	no	emerge
GUYANA	Guyana Chronicle	Beating COVID	2021-03-20	After	"However, there is still much more to be done, especially with new, unknown variants of the virus showing up with dogged determination"	no	show up
UK	Daily Mail	NEW TEST SPOTS VARIANTS FASTER	2021-03-22	After	"A groundbreaking' new test that can rapidly identify emerging variants of coronavirus is being tested"	no	emerge
CANADA	Star	Vaccinations working among those 80 and up;Tam touts success among older population as cases rise for younger groups	2021-03-22	After	"The emergence and spread of certain SARS-CoV-2 virus variants heightens this concern."	no	emerge
INDIA	TOI	Not variants, but flouting of mask rule tied to rise in cases'	2021-03-24	After	We're on watch to check whether any new strain is emerging," he said.	no	emerge
INDIA	TOI	Not variants, but flouting of mask rule tied to rise in cases'	2021-03-24	After	He further said, "As long as there're a large number of active cases in the country, there's a likelihood of virus mutating and new variants coming up."	no	come
INDIA	Hindu	COVID-19: Genome sequencing by INSACOG shows variants of concern and a novel variant in India: Health Ministry	2021-03-24	After	Variants of concern are mutated types of coronavirus associated with either increase transmission, a reduction in neutralising antibodies or severe disease.	no	mutate
USA	WSJ	REVIEW --- Herd Immunity Won't Save Us -- But We Can Still Beat Covid-19 --- A national system of proactive surveillance, innovative contact tracing and just-in-time vaccination can get the pandemic under control -- and prepare us for the next one.	2021-03-27	After	The virus is changing so rapidly that immunity to the Covid strain of yesterday may not protect against today's or tomorrow's strain	no	change
INDIA	Hindu	Coronavirus | First COVID-19 re-infection case in Rajasthan treated successfully	2021-03-28	After	The hospital has sent the patient's samples to the National Institute of Virology, Pune, to confirm if it was an instance of mutated SARS-CoV-2 or a new strain of the virus.	no	mutate
INDIA	TOI	Second wave of new Covid cases in Bengal may peak in May-June	2021-03-31	After	This time, it is set to happen much quicker due to the mutated strains that are more transmissible	no	mutate
CANADA	Globe and Mail	B.C. waited too long to respond to the rising third wave of COVID-19;OPINION	2021-03-31	After	"When you begin to pretend that a pandemic is over at the same time as a virus is not only still on the loose, but has spawned even deadlier mutations of itself, you are asking for trouble."	no	spawn
INDIA	TOI	Coronavirus reinfection: Senior citizens more likely to get reinfected, according to a new study	2021-04-01	After	.The emergence of newer mutations and variants is also making many test positive for the virus more than once	no	emerge
INDIA	TOI	UNICEF & WHO warn of further rise in cases if norms are flouted	2021-04-02	After	World Health Organization (WHO) in Chhattisgarh warned that higher transmission of the virus may lead to the emergence of new variants which could evade vaccines	no	emerge
INDIA	Hindu	COVID-19 second wave leaves doctors in Kerala baffled	2021-04-02	After	"Part of the spread could of course be due to the emergence of mutant variants. We have little information on the clinical relevance of many variants of interest, even though the E484Q and L452R mutations in Maharashtra or the N440K in Kerala are said to confer immune escape and increased infectivity to the virus," says R. Aravind, Head of Infectious Diseases, Thiruvananthapuram Medical College.	no	emerge
AUS	Age	Dumb and dumber on vaccines	2021-04-02	After	This will be essential as new strains of COVID-19 emerge	no	emerge
USA	WSJ	Fourth Wave Targets the Young and Restless	2021-04-03	After	We also have taken belated notice that viruses evolve	yes	evolve
CANADA	Globe and Mail	Why the EU won't see the pandemic end any time soon;OPINION	2021-04-03	After	"The longer the vaccination campaigns take, the greater the opportunity for the variants to emerge and spread."	no	emerge
CANADA	Globe and Mail	Why the EU won't see the pandemic end any time soon;OPINION	2021-04-03	After	"But in late 2020, the P.I. variant emerged and spread rapidly, turning Manaus into a death zone and crushing its hospitals."	no	emerge
USA	WSJ	World News: U.K., More Upbeat Than EU on Covid, to Ease Curbs	2021-04-06	After	if another worrisome variant of the virus emerges.	no	emerge
UK	Sun	If foreign tourists are flying in, why can't we fly out?	2021-04-07	After	"Viruses mutate and always will, and life (if actually lived properly rather than cooped up) will always involve an element of risk.	no	mutate
USA	WSJ	U.S. News: U.K. Variant of Coronavirus Now Dominant Strain in U.S. --- Speedier vaccinations urged to combat rise of more-contagious mutation circulating	2021-04-08	After	U.K. variant is one of several more contagious mutations of the virus to emerge in recent months	no	emerge
CANADA	Globe and Mail	PLAYING LIFE, ONE PEG AT A TIME;FIRST PERSON	2021-04-08	After	"In these uncertain times, so much of our day is consumed with COVID-19: following the news about virus mutations and vaccine shortages, tracking the daily case counts, making decisions about what we can and cannot safely do, and figuring out ways to get what we need."	no	mutate
INDIA	TOI	Exclusive Interview! Aanchal Shah on being a medical student: I am working as a frontline warrior	2021-04-11	After	People need to understand the situation right now as the second wave is so strong and COVID-19 has transformed itself to a different strain and a higher level.	no	transform
GUYANA	Kaieteur	Redouble mask wearing efforts – Emergency Medicine Specialist urges	2021-04-13	After	"Instead of subsiding, it would seem that COVID-19 has not only been increasing but steadily mutating, with scientists, quite often, deriving new theories about it."	no	mutate
INDIA	TOI	12.7 lakh fully vaccinated in Uttar Pradesh	2021-04-14	After	It would also lower the chances for new mutations and variants to develop	no	develop
USA	WSJ	Global Variants Fuel Surge In Cases	2021-04-16	After	highly contagious variants of the coronavirus that are popping up far from	no	pop up
INDIA	Hindu	Coronavirus | SII CEO appeals to U.S. seeking lifting of embargo on export of raw material for vaccine	2021-04-16	After	With the emergence of new variants of concern, these efforts have been stepped up to set up systems to quickly identify and study emerging variants.	no	emerge
CANADA	Star	This may be the future of fighting COVID;Seattle man is getting third dose of vaccine in Moderna's booster trial	2021-04-16	After	"Now he's rolled up his sleeve again, as the company begins a new trial of a shot designed to target the variant that first emerged in South Africa."	no	emerge
CANADA	Star	This may be the future of fighting COVID;Seattle man is getting third dose of vaccine in Moderna's booster trial	2021-04-16	After	"Most of Canada's vaccine suppliers are testing new versions against the new variants that have emerged around the world, though questions about whether they'll be needed remain.	no	emerge
CANADA	Star	This may be the future of fighting COVID;Seattle man is getting third dose of vaccine in Moderna's booster trial	2021-04-16	After	""Once COVID stops raging, mutations will slow right down," he said.	no	mutate
UK	Daily Mail	INFECTIONS AT LOWEST LEVEL SINCE AUTUMN	2021-04-17	After	therefore more people who are vaccinated here and overseas, the less chance we give the virus to mutate.'	no	mutate
GUYANA	Kaieteur	Coronavirus: These are our endgame options; our behaviour will determine where we end up	2021-04-18	After	"If we are not careful, this virus will continue to mutate and evolve into forms that are more deadly and vaccine resistant."	yes	evolve
GUYANA	Kaieteur	Coronavirus: These are our endgame options; our behaviour will determine where we end up	2021-04-18	After	"Scientists are associating this surge with the new variants that are currently circulating and their ability to thrive and further mutate as humans continue to behave irresponsibly."	no	mutate
GUYANA	Kaieteur	Coronavirus: These are our endgame options; our behaviour will determine where we end up	2021-04-18	After	In addition, there will have to be drastic change in behavioural patterns to curb the spread of new mutations of the virus as the more the virus mutates, the likelier it will become a permanent fixture with us.	no	mutate
GUYANA	Kaieteur	Coronavirus: These are our endgame options; our behaviour will determine where we end up	2021-04-18	After	First, we will have to ensure stricter adherence to prevention guidelines so that we prevent the virus from spreading and mutating to more infectious and vaccine resistant forms.	no	mutate
GUYANA	Kaieteur	Coronavirus: These are our endgame options; our behaviour will determine where we end up	2021-04-18	After	This will then buy us sufficient time to ramp up vaccination rates and decrease the spread of the virus and its ability to mutate into deadlier and more infectious forms.	no	mutate
INDIA	TOI	UP: RTPCR negative, but symptomatic to be treated as presumptive Covid cases	2021-04-19	After	"Then, the virus could have mutated"	no	mutate
USA	WSJ	Poorest Nations Fall Behind As Vaccine Efforts Stagnate	2021-04-20	After	large reservoir of the coronavirus circulating, giving it the chance to mutate and possibly spill over to developed countries.	no	mutate
INDIA	TOI	We must be two steps ahead of virus, but we end up chasing it'	2021-04-20	After	"This time it's more infectious and more deadly as it is a mutant strain"	no	mutate
UK	Sun	DOUBLE BUBBLE;NEW MILESTONE IN THE B NE IN THE BATTLE AGAINST COVID l1 in 5 adults have 2nd jab lAutumn booster plan	2021-04-20	After	But with Covid mutations a growing threat, the Health Price is right ... Katie gets jab	no	mutate
INDIA	TOI	Chhattisgarh: 70% vaccination, herd immunity will flatten the curve, says doctors	2021-04-21	After	"which tends to mutate as per its biological nature"	no	mutate
INDIA	TOI	Chhattisgarh: 70% vaccination, herd immunity will flatten the curve, says doctors	2021-04-21	After	"AIIMS Raipur has already confirmed that the double mutated virus strain of N440K in Chhattisgarh is highly infectious"	no	mutate
INDIA	TOI	Is Indian Covid variant behind second wave that started from Vidarbha?	2021-04-23	After	"There is a theory that this variant emerged in Amravati, and caused the huge surge in cases in nearby districts in February"	no	emerge
INDIA	TOI	Is Indian Covid variant behind second wave that started from Vidarbha?	2021-04-23	After	"Covid-19 cases have risen sharply in India as new variant called B.1.617 has emerged"	no	emerge
INDIA	Hindu	IMA calls for curfew on counting day	2021-04-23	After	The IMA pointed out that it was the emergence of mutant variants of SARS-CoV-2 which has intensified disease transmission and that the State needed to conduct more scientific studies to generate molecular evidence in support of this theory.	no	emerge
AUS	Age	No Pfizer for over-50s as India flights cut	2021-04-23	After	Such is the concern about the catastrophic epidemic now unfolding in India, fuelled by the emergence of new, mutant strains of the virus, that in advance of yesterday's national cabinet meeting Victoria supported an immediate ban on all travelers from India, Pakistan and Bangladesh.	no	emerge
USA	NYT	Pfizer and Moderna Offer Defense Against Variant In New York, Studies Say: [Foreign Desk]	2021-04-24	After	"This could potentially be a good thing as the virus is creating mutations,"	no	create
INDIA	TOI	First obligation is to Americans, says US on India's request for vaccine raw materials	2021-04-24	After	"If you finish vaccinating your people before Africa or other parts of the world, you have not done yourself any justice because variants will emerge and undermine your own vaccination efforts"	no	emerge
CANADA	Star	Vaccines must be available for whole world	2021-04-24	After	"Vaccination delays around the world will give the virus more time to mutate into ever newer and more dangerous variants."	no	mutate
CANADA	Star	Some restrictions could be lifted in July;Modelling projects crisis could ease in summer if vaccination rate hits 75%	2021-04-24	After	""Such doses would be used if people need to continue to get vaccinated after their first doses as the coronavirus continues to mutate around the world, and Trudeau said the purchases are meant to ensure the country is prepared.	no	mutate
INDIA	TOI	Melghat sees spurt in deaths, many suspected to be due to Covid	2021-04-25	After	"One of the doctors practising in Melghat said that it appeared from the symptoms that a new variant has emerged"	no	emerge
INDIA	Hindu	Breakthrough infections emerge new concern	2021-04-25	After	It said on Wednesday that the emergence of the virus variants and the fact that health workers are constantly exposed to the virus are the key reasons for these infections.	no	emerge
INDIA	TOI	Presence of double mutant virus found in state: CM	2021-04-28	After	"To find out whether any variation has occurred in strains of SARS-CoV-2 in Kerala and whether this is the reason behind the surge in the caseload here"	no	vary
INDIA	Hindu	Coronavirus | Reducing movement, activity needed to break chain of transmission, says Lancet Commission India task force head	2021-04-28	After	And third, we didn't invest enough resources to study the emergence of new variants quickly enough.	no	emerge
CANADA	Star	N.L. doctors, nurses joining T.O. hospitals;Red tape to work in different provinces normally takes months	2021-04-28	After	""Johnson said now is a good time to plan for the future and the ongoing need, especially since with all the variants emerging, there may be a heightened need for some time.	no	emerge
INDIA	TOI	Need extreme caution against mutant virus: CM	2021-04-29	After	"The risk assessment study conducted on the three genetically-modified viruses found in the state evaluated the spread of the disease"	no	modify
USA	WSJ	East Is East: India's Covid Crisis Could Reach You Too	2021-04-30	After	the greater the chance that it will develop mutant strains more difficult to treat with existing v	no	develop
INDIA	TOI	Madhya Pradesh: Corona curfew to be enforced strictly till May 7, says chief minister	2021-04-30	After	"but it's time for extreme caution as the Covid virus can quickly change strain, he warned."	no	change
INDIA	TOI	Kerala: Daily cases cross 35,000 mark, test positivity rate at 25.3%	2021-04-30	After	"Genetically mutated virus strains were detected in 11 of them.Among those who tested positive on Wednesday"	no	mutate
USA	WSJ	What India's Viral Misery Is Telling Us	2021-05-01	After	Viruses mutate, yes -- some 300,000 distinct Covid-causing strains are estimated to exist. The flu also mutates.	no	mutate
INDIA	TOI	Health officials expect surge in Bilaspur, Korba & Raigarh	2021-05-01	After	"The mutated strain of corona virus in second wave has claimed life of average 204 people every day in state"	no	mutate
INDIA	TOI	April cruellest month for Gujarat in its Covid war	2021-05-02	After	"While the state health department officials are still reluctant to blame the Covid variant for the surge, experts have already pointed at viral mutation as the cause of change in spread and severity pattern"	no	mutate
GUYANA	Guyana Chronicle	India’s COVID-19 battle should be a lesson for everyone	2021-05-02	After	"Importantly, in a recent interview with the Guyana Chronicle, Adviser to the Minister of Health, Dr. Leslie Ramsammy, explained that as the virus moves from person to person, it changes."	no	change
GUYANA	Guyana Chronicle	India’s COVID-19 battle should be a lesson for everyone	2021-05-02	After	"Again, while most changes are inconsequential, it is reasonable to assume that the probability of a more infectious, mutated form of the virus can be created with the increase in the number of new infections, resulting from the spread of the virus to more people."	no	create
USA	WSJ	U.S. News: Resilient Strain Can Be Curbed --- Vaccines in U.S. work well against the U.K. variant even though it is highly contagious	2021-05-03	After	ther coronavirus variants that scientists have flagged as a concern have also been identified in the U.S., including those that first emerged in Brazi	no	emerge
INDIA	Hindu	Fresh supplies of vaccine to reach Kerala today	2021-05-04	After	The longer it takes to cover the susceptible population, the more opportunities we are giving the virus to mutate into newer variants.	no	mutate
USA	WSJ	American Health Depends on Exporting Covid Vaccines	2021-05-05	After	Uncontrolled spread of the virus breeds variants, which can come to the U.S.	no	breed
INDIA	TOI	Struggling to get O2 cylinders', Air India pilots refuse to fly unless vaccinated for Covid 'urgently'	2021-05-05	After	"Due to our unwavering support, Vande Bharat Mission and relief operations continue to run smoothly even in the face of a resurgence of even deadlier strains of Covid-19"	no	resurge
INDIA	TOI	Air India to vaccinate all staff, including flying crew, by May end	2021-05-05	After	"Vande Bharat Mission and relief operations continue to run smoothly even in the face of a resurgence of even deadlier strains of Covid-19"	no	resurge
INDIA	TOI	Let's pick up the pieces & start afresh	2021-05-05	After	"If the 'caged' virus mutates and strikes with deadly venom, remember, we are the chosen ones"	no	mutate
CANADA	Globe and Mail	BRITAIN BETS BIG ON ASTRAZENECA;PANDEMIC	2021-05-06	After	"And we think that it's actually unlikely to happen unless a variant comes along which resets that relationship again," he said.	no	come
AUS	Age	CSL forced to pay more for plasma in US	2021-05-06	After	The major risk to CSL would be if coronavirus variants emerge that are resistant to current vaccines,	no	emerge
USA	NYT	Pfizer Shot Works Well On Variants, Studies Find: [Foreign Desk]	2021-05-07	After	"I believe we can get on top of this and we can get on top of the emergence of new variants"	no	emerge
USA	WSJ	Global Virus Deaths Set to Top 2020	2021-05-07	After	New variants of the virus are advancing faster than overworked labs can track them.	no	advance
INDIA	TOI	Expect second wave to fall as fast as it went up	2021-05-07	After	"But the target population for herd immunity has changed since the arrival of new Covid strains"	no	arrive
USA	NYT	Virologists Draw Out Solid Pandemic Data From the Wastewater Drain: [Foreign Desk]	2021-05-09	After	"recently identified novel combinations of mutations, which might suggest the presence of new variants"	no	mutate
INDIA	TOI	India approves anti-Covid cocktail given to Trump: What you should know	2021-05-09	After	"the cocktail remains efficacious against widest spread variants and reduces the risk of losing its neutralisation potency against new emerging variants"	no	emerge
USA	NYT	To Weaken a Mortal Threat, Do One Simple Thing: [Science Desk]	2021-05-11	After	"whenever someone gets infected with the coronavirus, a mutation to an even more dangerous variant could arise"	no	arise
USA	WSJ	Children 12 to 15 Are Cleared By FDA to Get Pfizer Vaccine	2021-05-11	After	as possible before dangerous variants able to elude shots emerge	no	emerge
AUS	SMH	The world is awash with money	2021-05-11	After	"World share market benchmarks are around their all-time highs even as the total number of COVID-19 cases continues to accelerate and new variants emerge to challenge existing vaccines. "	no	emerge
USA	WSJ	World News: India Struggles to Contain Variants --- Surge puts pressure on labs that do genomic sequencing needed to track Covid mutations	2021-05-12	After	contributed to the surge also helped more infectious variants evolve and disseminate	yes	evolve
AUS	Age	Quarantine rethink call after latest virus escape	2021-05-12	After	However, he warned that with the evolution of the virus and variants of concern emerging overseas, health authorities must be open to all possibilities.	yes	evolve
NIGERIA	Punch	COVID-19: Ruthless South Africa variant hits Ghana, Togo, 21 others, says WHO	2021-05-12	After	researchers had said that B.1.351 might be around 50 per cent more contagious, based on the much faster rate of COVID -19 transmission since its emergence and biological studies of changes to the structure of the virus	no	change
USA	NYT	Covid Spike Alarms World's Most Vaccinated Country: [Foreign Desk]	2021-05-13	After	"particularly when considering the multiple variants appearing around the world"	no	appear
INDIA	TOI	Centre asks states to re-open poultry shops; animal welfare groups insist on not lowering guard	2021-05-14	After	"claiming that the rise of antimicrobial resistance, along with the emergence of new, highly pathogenic viral strains have been linked to live animal markets, including pet, wildlife trade and meat production systems Centre asks states to re-open poultry shops; animal welfare groups insist on not lowering guard"	no	emerge
INDIA	TOI	How shortage of vaccines for 18-44 group will hurt children	2021-05-15	After	"Luckily, even after all its mutations the Covid virus is not too dangerous for children"	no	mutate
INDIA	TOI	How shortage of vaccines for 18-44 group will hurt children	2021-05-15	After	"They say vaccinating adults around the world is extremely important now for "gaining better control of the disease...and preventing or slowing the emergence of worrisome viral variants"	no	emerge
INDIA	TOI	How shortage of vaccines for 18-44 group will hurt children	2021-05-15	After	"Next time, the virus might change in a way that makes it prey on children"	no	change
CANADA	Star	Bred for fur, they could be virus spreaders;In B.C., doctors are pushing the government to shut down mink farms over outbreak risks	2021-05-16	After	""Although the Danish government came under fire for killing the animals before compensation plans for farmers were in place, officials said it was done to prevent a mutated form of coronavirus found in minks from potentially hampering the effectiveness of future vaccines.	no	mutate
CANADA	Star	Bred for fur, they could be virus spreaders;In B.C., doctors are pushing the government to shut down mink farms over outbreak risks	2021-05-16	After	"He said it would have made sense to take the sensible precaution of pausing breeding on mink farms, since a large number of animals in cages increases the risk of dangerous mutations of COVID-19..."	no	mutate
INDIA	TOI	US, wealthy west failing India and developing countries, says NYT	2021-05-17	After	"They are also both cheaper and easier to manufacture in massive quantities while being easier to modify as new variants emerge and regular boosters become a necessity"	no	emerge
INDIA	Hindu	COVID-19 response over next 6-18 months critical, says Soumya Swaminathan	2021-05-17	After	Variants are basically the virus mutating or evolving, and so there are changes in the viral genome.	yes	evolve
USA	NYT	Britain Savors End of Lockdown, But Variant Emerges as a Threat: [Foreign Desk]	2021-05-18	After	But some experts believe that the government should have reacted faster to the emergence of the variant.	no	emerge
USA	WSJ	U.S. News: Covid Patients in Hospital Are Younger	2021-05-18	After	We suspect that it is both the inclement rise and spread of variants of concern	no	rise
AUS	Age	Drug a 'heat-seeking missile' to target COVID-19	2021-05-18	After	"This treatment is designed to work on all betacoronaviruses such as the original SARS virus (SARS-CoV-1) as well as SARS-CoV-2 and any new variants that may arise in the future because it targets ultra-conserved regions in the virus' genome,"	no	arise
INDIA	TOI	600 cases of B.1.617 in US; India, others trace mutation	2021-05-19	After	"Scientists are not worried about the origin of the mutation so much but are more interested in finding out how far it can mutate"	no	mutate
INDIA	TOI	600 cases of B.1.617 in US; India, others trace mutation	2021-05-19	After	"The place of origin and emergence of variants is irrelevant and we should not be identifying the variants by the place/country of emergence"	no	emerge
USA	NYT	E.U. to Drop Travel Ban For Vaccinated Visitors As Vacation Season Starts: [Foreign Desk]	2021-05-20	After	"The bloc would also maintain an emergency brake option, a legal tool that would allow it to quickly snap back to more restrictive travel conditions if a threatening variant or other Covid emergency emerged"	no	emerge
INDIA	TOI	CM Concerned About Kids, Centre Diplomatic Image'	2021-05-21	After	"first on the development of a new strain in Singapore"	no	develop
USA	WSJ	World News: Health Authorities Work on Vaccine-Booster Programs	2021-05-21	After	Concerns that Covid-19 may morph into a seasonal menace are driving preparations in the U.S	no	morph
CANADA	Globe and Mail	RACISM AND COVID-19 ARE INTERLOCKING PANDEMICS WREAKING HAVOC ON RACIALIZED COMMUNITIES ACROSS THE CONTINENT;OPINION	2021-05-22	After	The new variants of COVID-19 continue to mutate, transform and defy our efforts to bring an end to the pandemic.	no	mutate
AUS	Age	Open Season	2021-05-22	After	Australia is relying heavily on AstraZeneca to vaccinate its elderly and Russell says some may require booster shots of an mRNA vaccine, such as Pfizer, as new strains of the virus evolve	yes	evolve
AUS	SMH	The New Normal	2021-05-22	After	"Australia was relying heavily on AstraZeneca to vaccinate its elderly and Russell says some of the population may require booster shots of an mRNA vaccine such as Pfizer as new strains of the virus evolve. "	yes	evolve
USA	NYT	Taiwan Was a COVID-19 Haven for Performers. Then Cases Flared.	2021-05-25	After	"emergence of more contagious variants in recent months, a relaxation of quarantine rules and a vaccine shortage gave the virus an opening"	no	emerge
INDIA	TOI	Why you shouldn't stop wearing a mask even after 2 vaccine doses	2021-05-25	After	"This virus is very clever and keeps mutating, we cannot say what will be the protection from vaccines as far as new emerging variants are concerned."	no	mutate
INDIA	TOI	Punjab has enough black fungus medicines'	2021-05-26	After	"One of the main reasons is the new mutations of virus, including the UK variant and the B.1.617, which spreads faster than others"	no	mutate
CANADA	Globe and Mail	Provinces look at moving up second doses	2021-05-26	After	some emerging data demonstrating that while a single dose provides some protection, it does not provide significant protection, especially with some emerging variants of concern.	no	emerge
INDIA	Hindu	Covid- 19 | Only way to decrease variants of COVID-19 is by increasing vaccination, says Dr Gagandeep Kang	2021-05-26	After	it is possible that virus replication may be prolonged. In such (rare) cases there may be a development of variants that escape the immune response," she said in another tweet.	no	develop
INDIA	Hindu	Covid- 19 | Only way to decrease variants of COVID-19 is by increasing vaccination, says Dr Gagandeep Kang	2021-05-26	After	Clear and simple- if viruses are not replicating they cannot mutate and become new variants. Vaccinate to decrease viral replication and variants," she said.	no	become
USA	NYT	Studies Show Immunity to Virus May Persist for Years: [Foreign Desk]	2021-05-27	After	"But those viruses change significantly every few years"	no	change
UK	Daily Mail	FRANCE NOW OFF-LIMITS'	2021-05-27	After	COVID is likely to evolve into a super mutant virus' and it is too early to know if the June unlocking can go ahead, top scientists warned yesterday.	yes	evolve
INDIA	Hindu	Coronavirus | 20 given wrong second COVID-19 vaccine dose in U.P. village	2021-05-27	After	studying if mixing the Pfizer and AstraZeneca doses could confer longer-lasting immunity, better protection against emerging variants or allow hospitals to switch jabs if stocks were scarce.	no	emerge
INDIA	Hindu	Aggressive vaccination key to combating COVID waves: doctors	2021-05-30	After	Lokesh Mahajan, HOD, Pediatrics, QRG Hospital in Faridabad explained that with many mutant strains emerging, it is necessary to follow all protocols and take precautions to keep children safe.	no	emerge
INDIA	TOI	Vaccines effective for at least 1 year, says Karnataka virologist	2021-05-31	After	"The existing Covid-19 vaccines are effective for a minimum one year as per the available evidence and if more troubling variants don't emerge, the protection may last for a couple of years"	no	emerge
INDIA	TOI	Covid-appropriate behaviour, enhanced vaccine drive will delay or diminish impact of 3rd wave'	2021-05-31	After	"With each new infection, the virus is exposed to a new host and its genetic environment and the viral multiplication within the host gives rise to new progeny and with each replication cycle, there is high probability of mutation"	no	mutate
INDIA	TOI	Covid-appropriate behaviour, enhanced vaccine drive will delay or diminish impact of 3rd wave'	2021-05-31	After	"Ideally, at least 1% of the samples must be tested for genomic sequencing to detect any emerging variants, which may be of concern"	no	emerge
INDIA	TOI	Covid-appropriate behaviour, enhanced vaccine drive will delay or diminish impact of 3rd wave'	2021-05-31	After	"This will also help us in preventing new infections and emergence of new mutants.	no	emerge
INDIA	TOI	Covid-appropriate behaviour, enhanced vaccine drive will delay or diminish impact of 3rd wave'	2021-05-31	After	If the virus mutates and new variants are more transmissible and virulent, then it will certainly affect the magnitude of the next wave	no	mutate
INDIA	Hindu	Coronavirus | 'India variant' to be called 'Delta' in new WHO system	2021-06-01	After	The World Health Organisation (WHO) has recommended a set of names to label emerging coronavirus variants that are deemed to be of global concern.	no	emerge
USA	NYT	Spared for Months, Vietnam Faces a Wave of New Infections	2021-06-02	After	"But the church cluster in Ho Chi Minh City, outbreaks at factories in the country’s north and the emergence of a troubling new variant all suggest that Vietnam’s luck may be running out"	no	emerge
INDIA	Hindu	Only one of three strains of B.1.617 COVID-19 variant first detected in India now a "variant of concern," says WHO	2021-06-02	After	WHO said that as the global public health risks posed by specific COVID-19 variants becomes better understood and evolves, it will continue to update the list of global VOIs and VOCs	yes	evolve
CANADA	Globe and Mail	Canada reluctant to join international vaccine-sharing campaign	2021-06-03	After	allow poorer countries to immunize hundreds of millions of health workers and other people, "saving lives, reducing the risk of new variants emerging and helping control the pandemic,"	no	emerge
UK	Daily Mail	NEPAL VARIANT' THREAT TO OUR HOLIDAYS	2021-06-04	After	here are thousands of variants. This is a virus that is changing all the time.'	no	change
UK	Daily Mail	AS RELEGATION TO AMBER LIST PROMPTS DIPLOMATIC STORM...	2021-06-04	After	The decision to move Portugal on to the amber list was apparently triggered by concerns over the Nepal variant, a mutated version of the Indian strain.	no	mutate
INDIA	TOI	Mixing vaccines can help end second dose crunch	2021-06-04	After	"Some experts say mixing might be necessary in the long run if the virus mutates into new variants or if limited immunity from a two-dose vaccine requires a booster shot sometime next year"	no	mutate
INDIA	TOI	State plans genome sequencing lab	2021-06-05	After	"but it will give us information about the patterns of transmission and an insight into how the virus has evolved"	yes	evolve
INDIA	Hindu	Delta variant led to most post-vaccine infections in Delhi	2021-06-05	After	logy (CSIR-IGIB) and the National Centre of Disease Control - two key labs of the Indian Sars Cov-2 Genomic Consortium (INSACOG) that tracks the emergence of key variants of the coronavirus	no	emerge
USA	NYT	As U.S. Ditches Masks, Europe Stays Cautious: [Foreign Desk]	2021-06-06	After	"The quandary that Europe faces over how to react to the Delta variant may recur as the virus continues to evolve, some scientists said"	yes	evolve
USA	NYT	As U.S. Ditches Masks, Europe Stays Cautious: [Foreign Desk]	2021-06-06	After	"As long as it remains in wide circulation, even more transmissible variants could emerge"	no	emerge
INDIA	Hindu	More transmissible COVID-19 variant possible in third wave of pandemic, says Kerala Health Minister Veena George	2021-06-07	After	Veena George said in the Assembly here on Monday that it was possible that a more transmissible mutant virus variant could emerge in the third wave of the COVID-19 pandemic in the State and that those who had not been vaccinated could be more susceptible to serious disease and death	no	emerge
CANADA	Globe and Mail	Global vaccination must be the top priority at the G7 meeting;OPINION	2021-06-08	After	A new variant is most likely to arise from huge populations with uncontrolled epidemics and no access to vaccines	no	arise
USA	NYT	China Returns to Its Strict COVID Limits to Fight a New Outbreak	2021-06-09	After	"New variants of the coronavirus have appeared, and questions remain about whether China’s self-made vaccines can stop them."	no	appear
INDIA	TOI	Covid round-up: Centre orders 44cr vaccine doses, AIIMS chief says no imminent concern for children, and more	2021-06-09	After	Waves can occur due to change in the virus (such as new variants).	no	change
INDIA	TOI	Why single-dose Covishield is not a bad idea	2021-06-09	After	"What about the risk of mutations?"	no	mutate
INDIA	TOI	Why single-dose Covishield is not a bad idea	2021-06-09	After	"There will be many new mutations in all populations because "the virus needs to mutate to survive as vaccines get rolled out, and some of these could further affect vaccine efficacy"	no	mutate
INDIA	TOI	Why single-dose Covishield is not a bad idea	2021-06-09	After	"So, even if you vaccinate with one dose, it cuts the risk of transmission, therefore mutation."	no	mutate
INDIA	Hindu	Kerala banks on genomic surveillance data	2021-06-09	After	Kerala is banking on real time genomic surveillance data to watch out for the emergence of possible new SARS-CoV-2 variants or any changes in disease patterns amongst various groups in the community	no	emerge
INDIA	Hindu	Kerala banks on genomic surveillance data	2021-06-09	After	We now have people who derived natural immunity through infection with the virus before it mutated, those who have vaccine-derived immunity as well as those achieved natural immunity through infection by the mutant strain	no	mutate
AUS	Age	Vaccines the 'pillar' for reopening the country	2021-06-09	After	"If the virus continues to replicate, we have to face [variants]. But the first step we must take is to put down the first major wall of protection, which is getting the current vaccine."	no	replicate
USA	WSJ	U.S. News: Variant From India Spreading Quickly Around World	2021-06-10	After	The highly transmissible Covid-19 variant that first emerged in India is rapidly spreading around the world	no	emerge
UK	Daily Mail	BRITAIN TO GIVE 100M JABS TO REST OF WORLD	2021-06-10	After	Officials hope that vaccinating people around the world will save lives, reduce the spread of the virus and restrict the emergence of new variants which could potentially be more dangerous than existing coronavirus strains.	no	emerge
CANADA	Globe and Mail	Ontario faces calls to shorten interval between AstraZeneca doses	2021-06-10	After	his biggest concern is that with new variants emerging, a single dose may not provide sufficient protection.	no	emerge
INDIA	TOI	Covid: Consortium of 4 cities funded for enhanced genome surveillance	2021-06-11	After	"Established with support and seed funding from Rockefeller Foundation, the new effort will track the emergence of viral variants correlated to epidemiological dynamics and clinical outcomes."	no	emerge
INDIA	TOI	Covid: Consortium of 4 cities funded for enhanced genome surveillance	2021-06-11	After	"This will also help correlate with clinical symptoms and disease severity, potentially associated with emerging variants."	no	emerge
INDIA	TOI	Coronavirus: Can the COVID-19 vaccine ensure protection against the new variant?	2021-06-14	After	"With the second wave of COVID disrupting India, there is a growing concern around the mutated forms or variants of the virus"	no	mutate
INDIA	TOI	Coronavirus: Can the COVID-19 vaccine ensure protection against the new variant?	2021-06-14	After	"As the virus replicates, it may not produce exact replicas of itself, resulting in the emergence of new strains, which may be more or at times less effective"	no	emerge
INDIA	TOI	Mass gatherings, virulent variants create perfect storm for virus to spread'	2021-06-14	After	"This inequality and lack of solidarity to access affordable vaccines only fuels the spread of the virus, allows the emergence of new variants and prolongs the pandemic"	no	emerge
UK	Sun	N saa no o one is fe until well are, it's t over yet;THE IRISH SUN BACKS UNICEF'S CAMPAIGN TO VACCINATE WORLD Says UNICEF IRELAND'S PETER POWER	2021-06-15	After	"While it's still transmitting in poorer countries, which it really is right now, we're all still greatly at risk from it - especially when variants might be capable of mutating"	no	mutate
INDIA	TOI	DRDO's 2-DG shields from all variants: CCMB	2021-06-16	After	"there is also an emergent requirement to find potential therapeutics to effectively counter this fast mutating novel coronavirus induced pathogenicity"	no	mutate
INDIA	TOI	Around 20,000 kids below 10 vulnerable in case of 3rd wave	2021-06-16	After	"However, if the virus strain mutates again, another wave is likely to hit us" | "Experts opine that the impact of third wave, if it happens, will depend on various factors - vaccination, mingling of people, mutation of the virus and how people abide by Covid protocols"	no	mutate
INDIA	Hindu	Morning Digest: Twitter appoints interim Chief Compliance Officer for India; AY.1 not a variant of concern, says Centre, and more	2021-06-16	After	India acknowledges emergence of new coronavirus variant India on Tuesday formally acknowledged the occurrence of AY.1, a coronavirus variant that is closely related to the prevailing Delta variant.	no	emerge
INDIA	TOI	Ocugen ropes in Jubilant Pharmova arm for making Covaxin for US, Canada	2021-06-17	After	"the company was fully committed to bringing Covaxin to the US and Canadian markets because it has the potential to save lives by adding a weapon to the arsenal in the fight against emerging variants"	no	emerge
CANADA	Star	Virus 'upped its game' with Delta variant, doctor warns	2021-06-17	After	""All pandemic viruses throughout history have done the same; the world has just never had the technology to watch this evolutionary process unfold in real time, he said.	yes	evolve
CANADA	Star	Virus 'upped its game' with Delta variant, doctor warns	2021-06-17	After	"But the virus's ability to mutate and improve is unsurprising, McArthur added."	no	mutate
CANADA	Star	Virus 'upped its game' with Delta variant, doctor warns	2021-06-17	After	""But as the virus moved across the globe, it adapted to its new human host and "evolved into something that is much more fine-tuned for transmission."	yes	evolve
CANADA	Star	Virus 'upped its game' with Delta variant, doctor warns	2021-06-17	After	"These are still early days in Delta's emergence, so its impact on hospitalizations and deaths remains unclear. But a Scottish study published earlier this week in the Lancet found the variant roughly doubles the risk of hospitalization compared to the B.1.1.7 variant."	no	emerge
INDIA	Hindu	State opening up cautiously	2021-06-18	After	The spectre of a third wave, driven by new and virulent strains of the mutating coronavirus, loomed large even as the State slowly opened up except for critical containment zones	no	mutate
INDIA	TOI	Urge PM Modi to reduce gap between 2 doses, Ravikumar tells Stalin	2021-06-19	After	"Now, the emergence of another variant (delta plus or AY.1) a few days ago has caused major concern"	no	emerge
CANADA	Star	Ford pushes to open salons, but Williams nails it	2021-06-19	After	"But as the Star's Jennifer Yang and Kenyon Wallace so comprehensively reported, Delta is the evolution of the virus: 50 per cent more transmissible, and twice as likely as the B.1.1.7 variant, or Alpha, to send you to the hospital. "	yes	evolve
INDIA	TOI	Single-dose cocktail helping patients recover faster: Docs	2021-06-20	After	"However, efficacy may reduce as new variants emerge,"	no	emerge
UK	Daily Mail	CHEAPER TESTS WOULD CUT NEW VARIANT RISK'	2021-06-21	After	"It says this requirement should remain in place until a high level of vaccination is attained globally, reducing the risk of new variants emerging."	no	emerge
USA	NYT	Covid-19 Renews Debate About Risks of Lab Work: [Science Desk]	2021-06-22	After	"Too little research on emerging viruses will leave us unprepared for future pandemics"	no	emerge
USA	NYT	Covid-19 Renews Debate About Risks of Lab Work: [Science Desk]	2021-06-22	After	"A decade ago, researchers used serial passage, as this procedure is known, to learn how new strains of influenza evolve."	yes	evolve
USA	NYT	Covid-19 Renews Debate About Risks of Lab Work: [Science Desk]	2021-06-22	After	"Flu strains start off in the guts of birds, and sometimes manage to mutate into a form that can spread among people."	no	mutate
USA	NYT	Covid-19 Renews Debate About Risks of Lab Work: [Science Desk]	2021-06-22	After	"Soon the viruses evolved to become better at replicating in the ferrets."	yes	evolve
USA	NYT	COVID Surge in Africa Raises Fears of a Calamity Like India’s	2021-06-22	After	"where the Delta variant first emerged and became dominant"	no	emerge
INDIA	Hindu	No sufficient data to be alarmed about Delta Plus variant: Maharashtra COVID-19 task force member	2021-06-23	After	"The new Delta Plus variant has been formed due to a mutation in the Delta or B.1.617.2 variant, first identified in India and one of the drivers of the deadly second wave"	no	form
UK	Sun	3m more jabs to be grabbed	2021-06-23	After	"Donnelly told the Cabinet the latest scientific advice indicates variants will continue to evolve and vaccine immunity is not definite which means booster shots could be needed."	yes	evolve
INDIA	TOI	Delta-plus variant found in Mysuru patient	2021-06-24	After	"The Delta variant has further mutated and we are seeing the sublineage Delta plus"	no	mutate
INDIA	Hindu	Manipur 'fully prepared' for third wave of COVID-19, says CM	2021-06-24	After	"Chief Minister N. Biren announced that Manipur was now fully prepared to face a possible third wave of COVID-19 and the emergence of variants of the coronavirus"	no	emerge
AUS	SMH	Brash budget assumptions go viral	2021-06-24	After	"The unpredictability of outbreaks amid emerging virus variants shows just how difficult it is to plan travel, weddings and, as the Treasurer is now likely learning, budgets."	no	emerge
USA	WSJ	The CDC's Eternal Emergency	2021-06-25	After	The CDC justifies the extension by noting that "new variants" have "emerged globally" that might be more transmissible, cause more severe disease and evade vaccines	no	emerge
INDIA	TOI	Karnataka: Room for more relaxation, but be cautious, say experts	2021-06-25	After	"we must be cautious about emerging mutated variants"	no	emerge
INDIA	Hindu	Coronavirus | 50 cases of Delta-plus variant reported in country	2021-06-25	After	"The reason why SARS-CoV-2 mutated include random error during replication, immune pressure after treatments (Convalescent Plasma, Vaccination etc), uninterrupted transmission due to lack of COVID-19 appropriate behaviour, which allowed the virus to transmit more and acquire fitness, he pointed out"	no	mutate
UK	Sun	Feeling a strain	2021-06-25	After	"That is why the pace of the vaccine rollout is crucial so we can have as much protection against it and any other future mutant strains of the virus as possible."	no	mutate
INDIA	Hindu	Coronavirus | Centre raises alert on delta plus variant	2021-06-26	After	"Doctors add that COVID-19 being an RNA virus has a tendency to undergo rapid mutations, therefore, there is a need to step up the vaccination drive across the globe."	no	mutate
INDIA	Hindu	Third COVID-19 wave unlikely to be as severe as second: ICMR	2021-06-26	After	"emergence of a variant that was more infectious and capable of thwarting immunity than the ones observed;"	no	emerge
INDIA	Hindu	Third COVID-19 wave unlikely to be as severe as second: ICMR	2021-06-26	After	"or an emerging variant of the virus must have a reproductive rate (R) over 4.5,"	no	emerge
AUS	SMH	A city shackled	2021-06-26	After	The virus has mutated and new, more transmissible variants have emerged and the Delta variant's rise has meant transmission spread has been swifter.	no	emerge
INDIA	TOI	13% of India's Covid variants of concern detected in region	2021-06-27	After	"Covid virus mutates due to immune pressure after treatment and uninterrupted transmission caused by lack of Covid appropriate behaviour helping the virus to transmit more and acquire fitness.	no	mutate
INDIA	TOI	Yogi: Genome sequencing to trace Delta+	2021-06-27	After	"sent for genome sequencing to decode the DNA footprint of the mutated virus.	no	mutate
GUYANA	Kaieteur	Coronavirus: The scary Delta variant is rapidly moving towards us	2021-06-27	After	"The Delta variant came about from a mutation of the SARSCOV2 virus (Coronavirus) and was first detected in India."	no	come
INDIA	TOI	New Variant May Breach Vax Shield'	2021-06-28	After	"the vaccines currently being administered may not offer sufficient protection against new mutant strains,"	no	mutate
INDIA	TOI	Immediate task is 3rd wave. It's always good to be overprepared'	2021-06-28	After	New variants of viruses do emerge, despite attaining herd immunity and vaccination.	yes	emerge
CANADA	Star	If they refuse vaccines, you can refuse them	2021-06-28	After	Though COVID-19 case numbers may be down, dangerous variants appearing in this pandemic (such as "Delta") are easily transmitted and infectious,	no	appear
AUS	SMH	View from lockdown is brighter	2021-06-28	After	Higher vaccine coverage will also prevent the virus from mutating and new variants from emerging here in Australia and globally.	no	emerge
USA	WSJ	World News: Variant Surges Across Vulnerable Africa --- Record cases lead to shortages of ICU beds and oxygen, as nations reimpose lockdowns	2021-06-29	After	making it more than twice as contagious as the original strain that emerged in China in 2019	no	emerge
INDIA	TOI	Keep emerging variants under watch: Experts	2021-06-29	After	"As these mutate, they change the ability of the virus to infect in terms of faster rate of transmission, increased virulence "	no	mutate
INDIA	TOI	Keep emerging variants under watch: Experts	2021-06-29	After	"viruses tend to mutate as they multiply, and mutations are tiny errors in the original genetic makeup of the organism. "	no	mutate
AUS	Age	Education and unity key to virus exit strategy	2021-06-29	After	Many understand that COVID-19 will likely never go away but simply mutate and live on in a different form, much as the flu does from year to year.	no	mutate
AUS	SMH	Singapore's road map to normal life	2021-06-29	After	Many understand that COVID-19 will likely never go away but simply mutate and live on in a different form, much as the flu does from year to year	no	mutate
INDIA	TOI	Cov patients with travel history to be treated at govt centres	2021-06-30	After	that if there are patients infected with the mutated virus,	no	mutate
INDIA	TOI	Uttar Pradesh: 57 districts have less than 50 active cases	2021-06-30	After	despite the decline in cases it was not advisable to take the Covid-19 prevention protocol for granted as the virus is fast changing its form.	no	change
CANADA	Globe and Mail	Uneven global recovery puts pressure on emerging markets	2021-06-30	After	"The downside scenario - in which COVID-19 variants become resistant to vaccines and the global economic recovery stalls - would be even worse for emerging markets"	no	become
CANADA	Star	More restrictions (and our hair) finally get the chop	2021-06-30	After	these intimacies that we used to take for granted can be stripped from us if wealthy powers don't share their shots - if a more dangerous variant emerges and isn't properly contained.	no	emerge
INDIA	TOI	In Punjab, Covid restrictions extended till July 10	2021-07-01	After	told the meeting that it was difficult to predict the third wave due to mutation,	no	mutate
AUS	SMH	Seven days that shook NSW from smugness	2021-07-01	After	That was before the highly contagious Delta variant of COVID-19 emerged.	no	emerge
USA	NYT	Arrival of Delta Variant Could End Australia's Pursuit of 'Covid Zero': [Foreign Desk]	2021-07-03	After	"It is now the dominant strain in England and India, where it first emerged, and"	no	emerge
INDIA	Hindu	Coronavirus | Third wave may see half the cases recorded during second surge, says govt. panel scientist	2021-07-04	After	"COVID infection can spread faster during the third wave if any new virulent variant of SARS-CoV-2 emerges"	no	emerge
INDIA	Hindu	Coronavirus | Third wave may see half the cases recorded during second surge, says govt. panel scientist	2021-07-04	After	"If a new mutant emerges, the third wave could spread rapidly, but it will be half of what the second wave was"	no	emerge
GUYANA	Kaieteur	Coronavirus: Our behaviour patterns are fuelling super mutants	2021-07-04	After	"It is important that both scientists and the general population keep track of variants as they evolve"	yes	evolve
GUYANA	Kaieteur	Coronavirus: Our behaviour patterns are fuelling super mutants	2021-07-04	After	"Should this happen or these variants mutate into more deadlier forms, we will be facing the possibility of more waves of infections in the months to come."	no	mutate
GUYANA	Kaieteur	Coronavirus: Our behaviour patterns are fuelling super mutants	2021-07-04	After	All around the world, newer variants of the SarsCov2 virus (Coronavirus) are being formed as they rapidly spread from person to person.	no	form
GUYANA	Kaieteur	Coronavirus: Our behaviour patterns are fuelling super mutants	2021-07-04	After	The Brazilian, UK and South African variants are examples of more infectious and deadly mutants that have already occurred and are fuelling the new worldwide surge.	no	occur
GUYANA	Kaieteur	Coronavirus: Our behaviour patterns are fuelling super mutants	2021-07-04	After	However, some vaccines are showing weaker effects and the concern is that at some point, variants may form that are totally resistant to the vaccines we have.	no	form
NIGERIA	Punch	Virologists advocate adherence to COVID safety protocols as Delta ‘variant of concern’ spreads	2021-07-04	After	The original variant found in India, otherwise identified as lineage B.1.617, mutated into lineage B.1.617.2.	no	mutate
NIGERIA	Punch	Virologists advocate adherence to COVID safety protocols as Delta ‘variant of concern’ spreads	2021-07-04	After	adding that the ability of the virus to spread between people had given rise to mutation of the Delta variant .	no	rise
NIGERIA	Punch	Virologists advocate adherence to COVID safety protocols as Delta ‘variant of concern’ spreads	2021-07-04	After	I thinkthey said it mutated in such a way that it attaches more firmly to the cells of the body and causes more severe infection.	no	mutate
NIGERIA	Punch	Virologists advocate adherence to COVID safety protocols as Delta ‘variant of concern’ spreads	2021-07-04	After	Therefore, if the variant is here, and ourpeople are not using masks, there is a possibility that we can have it also or another different mutant, as long as that variant multiplies around; that is what leadsto mutation.”	no	mutate
NIGERIA	Punch	Virologists advocate adherence to COVID safety protocols as Delta ‘variant of concern’ spreads	2021-07-04	After	He added that, over time, new variants might emerge thatcould be more or even less pathogenic than those already discovered.	no	emerge
USA	NYT	An Independence Day Event to Celebrate Progress on the Pandemic: [Correction]	2021-07-05	After	"and that the variant could mutate in ways that leave even vaccinated Americans vulnerable"	no	mutate
USA	WSJ	Health &amp;amp; Wellness: Safe-Summer Planning for Kids --- What parents with unvaccinated children should consider as vacation season gets under way	2021-07-06	After	We're seeing evolution before our eyes," he says. "This is going to be an ongoing issue, especially if we can't get more people vaccinated	yes	evolve
UK	Sun	SHOULD WE DITCH MASKS AFTER JULY 19?	2021-07-06	After	"The more the virus spreads, the more likely it is that it will mutate again, causing an even more serious disease."	no	mutate
AUS	SMH	Pandemic road map on right path	2021-07-06	After	Also, on occasions it is likely restrictions will need to be introduced to stop large outbreaks in the community, especially with the emergence of new variants.	no	emerge
UK	Daily Mail	WE WON'T GET BACK TO NORMAL TILL NEXT SPRING	2021-07-07	After	"Health Secretary Sajid Javid admitted yesterday the Government was retaining some powers to re-impose restrictions should a vaccine-resistant variant arrive."	no	arrive
AUS	SMH	Natural immunity no way to beat virus variants	2021-07-07	After	The co-senior author, Associate Professor Stuart Turville of the Kirby Institute, said the study looked at the level of immunity from COVID-19 infection and whether it was compromised by mutations of the virus.	no	mutate
USA	NYT	Pfizer and BioNTech Plan to Test a Vaccine Against the Delta Variant: [Live Blog Post]	2021-07-09	After	"Every unvaccinated person offers the virus additional opportunities to mutate into dangerous variants"	no	mutate
USA	WSJ	Pfizer Will Ask U.S. to Clear Booster for Covid-19 Variants	2021-07-09	After	shot of its Covid-19 vaccine to heighten protection against infections as new virus strains rise	no	rise
INDIA	TOI	Genome lab to help analyse Covid variants	2021-07-09	After	The coronavirus is notorious for mutating and in such circumstances,	no	mutate
CANADA	Globe and Mail	Canada needs to fix the management of its borders now to prevent a fourth wave;ANALYSIS	2021-07-10	After	"More variants will likely emerge, some highly transmissible and virulent, some potentially vaccine evasive"	no	emerge
CANADA	Star	You can watch the life return to the city';If cases continue to fall and vaccine rates rise, August could be 'normal'	2021-07-10	After	"There are a lot of variants. There are going to be new variants, and we're all going to learn the Greek letters of the alphabet," he said.	no	going to be
INDIA	TOI	Tope: Study on breakthrough infections on the anvil	2021-07-11	After	to continuously generate viral genomic sequences from positive samples to identify potential vaccine breakthrough mutations in each state,	no	mutate
NIGERIA	Punch	Delta variant: NMA, virologists warn Nigerians, experts probe virus strain	2021-07-11	After	we identified the United Kingdom variant and now we have identified a new variant that emerged from Nigeria	no	emerge
USA	NYT	‘Freedom Day’ Coming to England, Ready or Not	2021-07-12	After	"which makes it vulnerable to mutations that could create fast-spreading or more lethal variants."	no	create
USA	NYT	‘Freedom Day’ Coming to England, Ready or Not	2021-07-12	After	"Variants emerge in those parts of the world where there is a lot of viral content,”	no	emerge
INDIA	TOI	Two Lucknow teens test positive for Kappa variant	2021-07-12	After	its detection will help authorities in devising future strategy to check its spread and possibilities of mutation	no	mutate
INDIA	Hindu	Coronavirus | Railways focus on paediatric healthcare facilities ahead of third wave	2021-07-12	After	"There is a strong apprehension of future course of the pandemic which may be in the current form of virus or in a mutated version"	no	mutate
USA	NYT	Weighing Booster Shots for the Immunocompromised: [Science Desk]	2021-07-13	After	"low immunity may allow the virus to continue to replicate in the body for long periods, potentially leading to new variants"	no	lead to
INDIA	TOI	Pocket outbreaks' of Delta as 11 more samples test positive in Ngp	2021-07-13	After	Dr Shailesh Mundhada, a pathology and immunology expert, said it is the way a virus evolves.	yes	evolve
INDIA	TOI	Pocket outbreaks' of Delta as 11 more samples test positive in Ngp	2021-07-13	After	Some new variants (mutations) cropping up and causing trouble can't be discounted,	yes	crop up
INDIA	Hindu	Matter of concern to see big crowds without masks in hill stations, markets: PM Modi	2021-07-13	After	"Emphasising the need to keep an eye on every variant of the coronavirus, he said experts are constantly studying how troubling the virus could be after mutations"	no	mutate
AUS	Age	What difference does it make with second AZ jab?	2021-07-13	After	All this data was collected before the Delta variant of COVID-19 emerged and changed the game.	no	emerge
AUS	Age	What difference does it make with second AZ jab?	2021-07-13	After	That could be a third shot of AstraZeneca or Pfizer's existing vaccines, or a shot of a new vaccine designed to tackle emerging variants.	no	emerge
AUS	Age	Call for national approach to Delta	2021-07-13	After	they warn more infectious types of COVID-19 emerging overseas will continue to "punch holes in every deficiency" of the country's pandemic response	no	emerge
AUS	Age	Call for national approach to Delta	2021-07-13	After	Professor Trauer, who was hopeful NSW could get on top of its outbreak, said new variants continued to emerge overseas	no	emerge
AUS	SMH	National rules 'desperately needed' to stop Delta: experts	2021-07-13	After	Experts have demanded a national approach to contain the highly transmissible Delta variant as they warn more infectious types of COVID-19 emerging overseas will continue to "punch holes in every deficiency" of the country's pandemic response.	no	emerge
AUS	Age	How will variants change our COVID-19 response?	2021-07-15	After	So what are the broader implications of the emergence of this variant and future variants and how will it change the way Australia - and the world - contains the pandemic?	no	emerge
AUS	Age	How will variants change our COVID-19 response?	2021-07-15	After	"All viruses change over time, especially viruses that have a genome made of RNA rather than DNA."	no	change
AUS	Age	How will variants change our COVID-19 response?	2021-07-15	After	And it's a huge warning shot. As long as the pandemic is allowed to run anywhere in the world, newer and even more concerning variants will emerge.	no	emerge
USA	WSJ	OPEC Ties Higher Oil Demand to Prices	2021-07-16	After	Despite uneven vaccination rates and the rise of the Delta coronavirus variant,	no	rise
INDIA	Hindu	Rise in COVID-19 cases in Kerala, Maharashtra cause of grave worry: PM	2021-07-16	After	"chances of mutation of the coronavirus would also increase and dangers of new variants would also rise"	no	mutate
UK	Daily Mail	AS FIRMS FROM OIL GIANTS TO MINERS BRING BACK DIVIDENDS, THERE'S AN...	2021-07-17	After	"In the interim, their largesse could be limited by an economic setback, or the emergence of a new Covid variant. "	no	emerge
USA	NYT	Where Few Got Covid Vaccine, Many Get Sick: [National Desk]	2021-07-18	After	"A principal reason, health officials say, is the emergence of the new, far more contagious variant called Delta, which now accounts for more than half of new infections in the United States."	no	emerge
INDIA	Hindu	A third COVID-19 wave can make its appearance felt as early as late August: ICMR epidemiologist Samiran Panda	2021-07-19	After	"emergence of a SARS-CoV-2 mutant that is able to escape the immunity we have acquired so far,	no	emerge
INDIA	Hindu	A third COVID-19 wave can make its appearance felt as early as late August: ICMR epidemiologist Samiran Panda	2021-07-19	After	emergence of a viral variant, which is more transmissible or easing of restrictions that were instated in some of the States following the second wave"	no	emerge
INDIA	Hindu	A third COVID-19 wave can make its appearance felt as early as late August: ICMR epidemiologist Samiran Panda	2021-07-19	After	"Do you think it will be the emergence of any new mutant that would lead to another surge?"	no	emerge
INDIA	Hindu	A third COVID-19 wave can make its appearance felt as early as late August: ICMR epidemiologist Samiran Panda	2021-07-19	After	second the emergence of a new mutant which is capable of escaping the immunity,	no	emerge
INDIA	Hindu	A third COVID-19 wave can make its appearance felt as early as late August: ICMR epidemiologist Samiran Panda	2021-07-19	After	third the emergence of a new mutant which is more transmissible and last a surge is possible in States which imposed effective State-level lockdown at an early stage during the second wave	no	emerge
INDIA	Hindu	A third COVID-19 wave can make its appearance felt as early as late August: ICMR epidemiologist Samiran Panda	2021-07-19	After	"the government is keeping a vigil on the emergence of new viral variants"	no	emerge
AUS	Age	Freedom day'? I call it a gamble	2021-07-19	After	Unfortunately, the rapid emergence of the more infectious Delta strain in May gave the virus a huge advantage in the race.	no	emerge
AUS	Age	Freedom day'? I call it a gamble	2021-07-19	After	Finally, losing control of the epidemic of infections risks the emergence of more potent virus variants in Britain like the Alpha variant first detected in south-east England after the relaxation of control measures last summer.	no	emerge
AUS	SMH	Freedom day? No, reckless gamble	2021-07-19	After	Unfortunately, the emergence of the more infectious Delta strain in May gave the virus a huge advantage	no	emerge
GUYANA	Kaieteur	Health Minister believes COVID-19 variants are here	2021-07-19	After	"Dr. Anthony during his interview explained that when these variants emerge and they become a variant of concern it is due to the fact that they are more transmissible."	no	emerge
GUYANA	Guyana Chronicle	More deaths, hospitalisations linked to COVID-19 variants	2021-07-19	After	These variants are created when viruses spread and mutate.	no	create
GUYANA	Guyana Chronicle	More deaths, hospitalisations linked to COVID-19 variants	2021-07-19	After	Even with the country being engaged in a robust vaccination rollout during the same time the surges began, the Minister of Health, Dr. Frank Anthony, in a recent update, opined that the emergence of variants of concern could be the causative factor.	no	emerge
GUYANA	Guyana Chronicle	More deaths, hospitalisations linked to COVID-19 variants	2021-07-19	After	“From a clinical perspective, we suspect this is what is happening,” he said when asked if the local authorities can definitively conclude that the emergence of these variants of the virus contributed to the exponential increase in infections, hospitalisations, and deaths.	no	emerge
GUYANA	Guyana Chronicle	More deaths, hospitalisations linked to COVID-19 variants	2021-07-19	After	Sometimes, however, viruses do mutate into ‘stronger’ or more advantageous forms of the virus.	no	mutate
GUYANA	Guyana Chronicle	More deaths, hospitalisations linked to COVID-19 variants	2021-07-19	After	These variants are still categorised as coronavirus that causes the disease COVID-19, except they have mutated into stronger (or more infectious) forms.	no	mutate
USA	WSJ	World News: England Sheds Most Covid Curbs	2021-07-20	After	reopening could spur the emergence of new variants as proliferating cases gives the virus more opportunities to mutate.	no	emerge
USA	NYT	Battle-Weary Nations Learn to Live With Covid: [Correction]	2021-07-22	After	"The emergence of more transmissible variants means that even wealthy nations with abundant vaccines, including the United States, remain vulnerable."	no	emerge
USA	NYT	Battle-Weary Nations Learn to Live With Covid: [Correction]	2021-07-22	After	"Much of the developing world is also still facing rising infections, giving the virus a greater opportunity to rapidly replicate, which then increases the risks of more mutations and spread"	no	increase
AUS	SMH	Former greats slam US star as 'selfish' for refusing vaccine	2021-07-22	After	But US medical experts have already recommended vaccinations for former patients given the rise of new variants of the disease.	no	rise
INDIA	TOI	No proof kids will be hit hardest in case of a third wave: Centre	2021-07-25	After	"The wave may occur either due to mutations in the virus or due to the available pool of susceptible population	no	mutate
CANADA	Star	Seneca College is doing its part to stop spread of COVID-19	2021-07-25	After	COVID-19 is nasty. It kills. It mutates.	no	mutate
NIGERIA	Punch	Delta variant: NMA, virologists warn Nigerians, experts probe virus strain	2021-07-25	After	a new variant that emerged from Nigeria	no	emerge
AUS	Age	Rapid testing crucial for speedy virus	2021-07-26	After	As vaccines continue to be rolled out, the greatest threat is the emergence of vastly more infectious variants that reduce the effectiveness of vaccines.	no	emerge
USA	NYT	Delta Variant Is Unlikely to Kill Recovery but May Wound It: [Business/Financial Desk]	2021-07-28	After	"The emergence of the variant has already caused several wobbly days on Wall Street."	no	emerge
USA	WSJ	U.S. News: Parent Fears Deter Some Vaccinations	2021-07-28	After	inoculate enough people to develop the widespread immunity that will limit the spread of Delta and stymie the emergence of new variants.	no	emerge
CANADA	Globe and Mail	Closer to the edge': The Delta variant and a lack of vaccines have Indonesia struggling with a COVID-19 catastrophe	2021-07-28	After	"The uncontrolled circulation of the virus will significantly increase the risk of emergence of new and more aggressive variants,"	no	emerge
USA	NYT	Variant Has New Yorkers 'Scared All Over Again': [National Desk]	2021-07-29	After	"Today, the coronavirus has crept back, in a new, more infectious form that has driven up cases and hospitalizations"	no	creep
INDIA	TOI	Ahead of third wave, experts split over efficacy of Covid vaccines	2021-07-29	After	While some argue that Covaxin will now be a better bet since it could be partially effective against mutated strains	no	mutate
INDIA	TOI	Ahead of third wave, experts split over efficacy of Covid vaccines	2021-07-29	After	So, it could be more effective against the mutated strains.	no	mutate
AUS	Age	Scientists split over Sydney's lockdown	2021-07-29	After	Delta is about 60 per cent more infectious than the Alpha variant of the virus, which in turn was perhaps 50 per cent more contagious than the version that emerged in Wuhan.	no	emerge
USA	NYT	This Wave's Geography Is Political: [Op-Ed]	2021-07-30	After	"And the rise of the Delta variant has caused a surge in cases all too reminiscent of the repeated Covid waves of last year."	no	rise
INDIA	TOI	New Covid-19 variants take shape in bodies of patients, finds study	2021-07-30	After	This results in the emergence of new variants.	no	emerge
INDIA	TOI	New Covid-19 variants take shape in bodies of patients, finds study	2021-07-30	After	Scientists from different research institutions, including the city-based Centre for Cellular and Molecular Biology (CCMB) have claimed to have decoded the mystery behind the emergence of new variants of novel coronavirus.	no	emerge
UK	Sun	The kids are not alright while the virus still rages;@Damien LaneDsun Cap'an Crunch, Camp'n Crunch. Munch aind muench and munnch and munch LanDeamien.Lane@the-sun.ie	2021-07-30	After	"Not only does Covid and the more transmissible Delta variant make kids sick, but, left to run amok in our younger population, it can easily mutate and become more deadly."	no	mutate
AUS	SMH	Mythology behind COVID anger	2021-07-30	After	"We can expect variants only to become more infectious and therefore quicker since that's what evolution demands for the virus' survival."	yes	evolve
AUS	SMH	Mythology behind COVID anger	2021-07-30	After	"Perhaps the virus will quickly evolve into something far less deadly"	yes	evolve
CANADA	Star	Passports a key tool in fight against fourth wave	2021-07-31	After	experts have warned for months that we must vaccinate as many people as possible, as quickly as possible, to outrun the inevitable emergence of COVID-19 variants.	no	emerge
INDIA	TOI	Worry for Odisha as corona cases stay above 1,500	2021-08-01	After	experts have been reiterating that the slow pace of fall can make the virus more virulent as there will be more mutant strains.	no	mutate
UK	Sun	Australia & China's Delta fear	2021-08-01	After	"It's a warning that the virus is evolving but it's also a call to action that we need to move now before more dangerous variants emerge"	yes	evolve
CANADA	Star	Passports a key tool in fight against fourth wave	2021-08-01	After	The way pandemics end is that viruses eventually mutate into something no longer harmful to humans. But that could be many years away.	no	mutate
CANADA	Globe and Mail	Booster shots in Canada are unlikely - for now;OPINION	2021-08-02	After	"Over the longer term, it is likely that vaccine dosing schedules, and vaccines themselves, will continue to evolve to meet challenges created by evolving population immunity and viral evolution"	yes	evolve
GUYANA	Guyana Chronicle	‘No price for the lives of Guyanese’	2021-08-02	After	Still, the emergence and surge of variants of concern of SARS-CoV-2, the virus that causes the disease COVID-19, present a new threat.	no	emerge
GUYANA	Guyana Chronicle	‘No price for the lives of Guyanese’	2021-08-02	After	These variants are still categorised as coronavirus that causes the disease COVID-19, except they have mutated into stronger or more infectious forms.	no	mutate
UK	Daily Mail	THE SUPER UNIVERSAL' VACCINE TO FIGHT OFF ANY CORONAVIRUS	2021-08-03	After	"SARS and MERS were less infectious than Covid-19 but far more deadly (the latter killed a third of those infected), and the fear is a future strain could combine the easy transmission of Covid-19 and the lethality of MERS."	no	combine
UK	Daily Mail	THE SUPER UNIVERSAL' VACCINE TO FIGHT OFF ANY CORONAVIRUS	2021-08-03	After	"Scientists at Nottingham University and the UK company Scancell are developing a universal Covid-19 vaccine which, as well as the surface spikes, targets a protein in the core of the virus which is far less likely to mutate."	no	mutate
UK	Daily Mail	THE SUPER UNIVERSAL' VACCINE TO FIGHT OFF ANY CORONAVIRUS	2021-08-03	After	"They “know” where their Achilles heels are and they disguise the bits of the virus that don't change very much between different strains to actively safeguard and protect themselves."	no	change
NIGERIA	Punch	Allow private sector to procure vaccine, PSN tells FG	2021-08-03	After	The Delta variant , a SARS - CoV - 2 mutation that originally surfaced in India in December 2020	no	surface
USA	NYT	World’s Coronavirus Infection Total Passes Staggering Figure: 200 Million	2021-08-04	After	"As the coronavirus continues to find new hosts across the planet at a rapid rate, the emergence of the delta variant — thought to be about twice as infectious as the original version first detected in Wuhan, China — is adding fuel to a fire that has never stopped raging."	no	emerge
USA	NYT	Biden Administration Planning to Require Foreign Travelers to Be Vaccinated	2021-08-04	After	"The known total of global coronavirus infections on Wednesday surpassed 200 million, a number fueled by the emergence of the delta variant, according to the Center for Systems Science and Engineering at Johns Hopkins University. "	no	emerge
CANADA	Star	Living with the threat of the Delta variant;Man barely survived his first bout with COVID-19. He doesn't want a second	2021-08-04	After	This new variant, Arellano quickly learned, is mutated enough that the antibodies his body built to fend off his previous coronavirus infection don't work so well against Delta.	no	mutate
USA	NYT	Dos and Don'ts For the Inoculated: [National Desk]	2021-08-05	After	"The rise of the Delta variant of the coronavirus has raised new questions about how the vaccinated can stay safe and avoid breakthrough infections"	no	rise
USA	NYT	Dos and Don'ts For the Inoculated: [National Desk]	2021-08-05	After	"But the rise of the highly infectious Delta variant has spoiled those plans."	no	rise
USA	WSJ	World News: WHO Seeks Booster Delays For Covid-19 --- Shortfalls in vaccine supplies are cited in call for moratorium until end of September	2021-08-05	After	it will have multiple opportunities to mutate into variants that are more successful at defeating vaccines.	no	mutate
INDIA	Hindu	Efforts to track emerging COVID-19 variants shrink	2021-08-05	After	"but India's efforts to sequence genomes to track for emerging variants plummeted after April"	no	emerge
INDIA	Hindu	Efforts to track emerging COVID-19 variants shrink	2021-08-05	After	"a network of 28 labs across the country equipped to sequence genomes of the coronavirus for emerging variants"	no	emerge
UK	Sun	SPAIN REIGNS AGAIN;E BINNED FOR TWO-JABBERS MUDDLE AS QUARANTINE (AND MAINLY WITHOUT PAIN) lConfusion over Covid tests s lBut great news for France	2021-08-05	After	"And the UAE, home of influencers' paradise Dubai, was removed from the red list, with other Middle Eastern holiday hubs Qatar and Bahrain, plus India where the Delta variant emerged."	no	emerge
NIGERIA	The Nation	How to eradicate viral hepatitis before 2030, by PSN	2021-08-05	After	Delta variant, a SARS-CoV-2 mutation that originally surfaced in India in December 2020, is real and the strain spread rapidly and almost becoming the dominant strain of the virus.	no	surface
INDIA	TOI	Stay alert, still not clear if antibodies protect against new variants: Docs	2021-08-06	After	experts from across the world say that this is a virus highly likely to mutate.	no	mutate
USA	NYT	The Covid Endgame Continues to Elude Us: [Op-Ed]	2021-08-07	After	"Even worse, much of the rest of the country, and even more of the rest of the world, isn't vaccinated, which is giving the virus vast opportunities for evolution"	yes	evolve
AUS	Age	Warning lockdowns to be more frequent	2021-08-07	After	"Delta is about 60 per cent more infectious than the Alpha variant of the virus, which in turn was perhaps 50 per cent more contagious than the version of the virus that first emerged in the Chinese city."	no	emerge
USA	NYT	They Persevered, and Folded: [Style Desk]	2021-08-08	After	"The virus could continue to mutate and remain with us for years to come, making it impossible to declare an official end"	no	mutate
INDIA	TOI	Karnataka sees 12,000 breakthrough infections, but officials say it's no cause for alarm	2021-08-08	After	"However, there are concerns newer variants of the virus could emerge through breakthrough infections.	no	emerge
USA	NYT	Virus Misinformation Spikes as Delta Cases Surge	2021-08-10	After	"These narratives are so embedded that people can keep on pushing these anti-vaccine stories with every new variant that’s going to come up"	no	come
INDIA	TOI	Avoid celebrations, cautions govt	2021-08-11	After	"I don't' think we will have another wave with the Delta variant unless we have a new mutation.	no	mutate
CANADA	Globe and Mail	Vaccines should be prioritized for poorer countries, not booster shots at home, experts say	2021-08-11	After	"Even if new variants of the coronavirus emerge that are able to more easily elude vaccine protection, Dr. Blakney said it's unlikely a new mutation would suddenly render the vaccines entirely ineffective"	no	emerge
AUS	Age	Lost months exact high human and financial cost	2021-08-11	After	That is what viruses like this one do: they mutate.	no	mutate
INDIA	TOI	Vaccine works against Delta, booster may not be needed	2021-08-12	After	Of course, it might be one that we're not aware of yet because the virus is evolving.	yes	evolve
INDIA	TOI	Vaccine works against Delta, booster may not be needed	2021-08-12	After	What is important to note is, as we've gone through the different variants that emerged since the original strain from Wuhan, protection against hospitalisation and death has been sustained through all of those variants.	no	emerge
UK	Daily Mail	1 IN 9 FIRST-WAVE COVID PATIENTS GOT IT IN HOSPITAL	2021-08-13	After	"He said rates have improved during more recent waves despite the emergence of more infectious variants, indicating the NHS has learned the lessons"	no	emerge
NIGERIA	Punch	Mutations won’t affect efficacy of vaccine, says virologist	2021-08-15	After	For coronavirus , it is known that they mutate and that is the essence of the surveillance to track the mutation.	no	mutate
CANADA	Star	Double-vaxxed singles hooking up again;But fears of a fourth wave are keeping some of them on the dating sidelines	2021-08-16	After	But there are concerns about new variants coming out that are less likely to respond to the vaccine, so just be aware of what's going on."	no	come
USA	NYT	As Delta Surges, a Realization That Covid Isn't Going Away: [National Desk]	2021-08-17	After	"But even though the vaccines remain effective, the virus has mutated and spread at a pace that has surprised some experts."	no	mutate
INDIA	TOI	Three sub-lineages of Delta-plus in circulation in Maharashtra	2021-08-17	After	The highly transmissible Delta variant mutated into Delta-plus,	no	mutate
CANADA	Globe and Mail	Ontario to require vaccine clinics in schools	2021-08-17	After	"This is a virus that will exploit any opportunity, any weakness in the system to mutate and become even more lethal"	no	mutate
CANADA	Star	Stay prepared' against COVID-19, Ford urges;Advice comes ahead of new vaccine mandate for doctors, hospital workers	2021-08-17	After	This is a virus that will exploit any opportunity, any weakness in the system to mutate and become even more lethal,	no	mutate
USA	NYT	U.S. to Recommend Booster Shots For Most Americans After 8 Months: [National Desk]	2021-08-18	After	"What keeps me up at night is the inevitability of a variant that is not responsive to the vaccine, so if this is how we stay ahead of it, I fully support it."	no	inevitability of a new variant
CANADA	Globe and Mail	What does the fourth wave mean for kids heading back to school?	2021-08-19	After	"Mutations of the coronavirus are constantly occurring, some of which can make it more transmissible and deadly"	no	mutate
INDIA	Hindu	Need to accelerate pace of vaccination in districts with low seroprevalence : NIE experts	2021-08-19	After	"the chances of virus spreading faster and emergence of new variants are high"	no	emerge
INDIA	Hindu	Need to accelerate pace of vaccination in districts with low seroprevalence : NIE experts	2021-08-19	After	"However, if a new immune escape variant emerges, we might see a bigger surge"	no	emerge
INDIA	Hindu	Need to accelerate pace of vaccination in districts with low seroprevalence : NIE experts	2021-08-19	After	"However, with the emergence of new immune escape variant, one could see a high upsurge of cases"	no	emerge
INDIA	TOI	Pfizer losing efficacy faster against Delta variant: Study	2021-08-20	After	the effectiveness of the Pfizer/BioNTech vaccine is waning faster than others when up against a high viral load mutation of the coronavirus	no	mutate
INDIA	TOI	India approves first vaccine for kids; world's first Covid-19 vaccine using DNA tech	2021-08-21	After	The platform because of its rapid plug and play technology can be easily adapted to deal with mutations in the virus,	no	mutate
CANADA	Globe and Mail	My decades-old 'vaccine passport' tells the story of disease in our time;OPINION	2021-08-21	After	"These bats appear to carry many coronaviruses, and have not only the unexplained ability to resist infection, but also to adjust this resistance as the virus mutates"	no	mutate
INDIA	Hindu	Why Karnataka's second wave is dragging on for long	2021-08-21	After	"If the same trend continues for the next three months and if there are no further mutations, the intensity of the third wave will be less severe"	no	mutate
GUYANA	Kaieteur	Coronavirus: Vaccinated or not, this isn’t the time for us to drop our guard	2021-08-22	After	While a vaccinated person has extremely good protection if they are infected, they can still spread this virus and are prime targets for the virus to mutate and form vaccine resistant strains.	no	form
GUYANA	Kaieteur	Coronavirus: Vaccinated or not, this isn’t the time for us to drop our guard	2021-08-22	After	We are in a race to prevent this virus from mutating so fast that we cannot keep up with it and it will become a permanent fixture with us like the Flu virus.	no	mutate
GUYANA	Kaieteur	Coronavirus: Vaccinated or not, this isn’t the time for us to drop our guard	2021-08-22	After	In the meantime, let’s avoid it by keeping our guards up and continue with preventative measures, which will help, prevent it from mutating into vaccine resistant forms.	no	mutate
USA	NYT	Science of Virus Keeps Evolving And Frustrating: [National Desk]	2021-08-23	After	"But health officials have not acknowledged clearly or often enough that their recommendations may -- and very probably would -- change as the virus, and their knowledge of it, evolved."	yes	evolve
UK	Daily Mail	NOW THAT'S A BOOSTER: UK NABS EXTRA 35M PFIZER JABS	2021-08-24	After	"Pfizer/BioNTech will have time to tweak their jab ahead of next winter if new variants emerge that are able to evade the existing jab."	no	emerge
INDIA	Hindu	Health dept. checklist to support school reopening	2021-08-25	After	"Parents feel reopening of educational institutions might trigger the third wave of COVID-19. Dr Srinivasa Rao, however, said that until a new and strong variant of coronavirus does not emerge, the third wave will not be seen"	no	emerge
INDIA	TOI	Karnataka: Delta plus may not drive third Covid wave, say experts	2021-08-26	After	Considering the devastation it caused, any mutation of the Delta variant should be closely watched,"	no	mutate
INDIA	TOI	Karnataka: Delta plus may not drive third Covid wave, say experts	2021-08-26	After	The Delta Plus variant is a mutation of the Delta variant (B.1.617.2)	no	mutate
INDIA	TOI	Karnataka mulls quarantine for travellers from Kerala	2021-08-26	After	"conduct genomic sequencing to find out if a mutated variant of the coronavirus is driving the surge in Kerala.	no	mutate
INDIA	Hindu	Delta variant sub-lineage AY.12 found in India	2021-08-26	After	"the India SARS-CoV-2 Genome (INSACOG) consortium, which tracks emerging variants, said in a report on Monday"	no	emerge
AUS	Age	Parents, don't panic about Delta	2021-08-27	After	"The Delta variant is about 60 per cent more infectious than the Alpha variant, which in turn was about 50 per cent more contagious than the strain of the virus that emerged in Wuhan."	no	emerge
INDIA	TOI	Now, all Covid +ves to be in institutional isolation	2021-08-28	After	We don't have that much multiplication going on to induce dramatic mutations.	no	mutate
INDIA	Hindu	India unlikely to witness a surge in cases in September	2021-08-29	After	"It is indeed possible for India to witness a large number of daily cases in September if a variant that is even more transmissible than the Delta variant has already emerged"	no	emerge
INDIA	Hindu	India unlikely to witness a surge in cases in September	2021-08-29	After	"there is no supporting evidence for the emergence of extremely transmissive variants other than the Delta variant"	no	emerge
GUYANA	Guyana Chronicle	Immunity and its boosters	2021-08-29	After	However, the results required further investigations before an overall pronouncement could have been made since it was later seen that reinfection was possible with emerging variants.	no	emerge
INDIA	TOI	Third wave likely to be less severe, says ICMR	2021-08-31	After	"vaccine-induced immunity, emergence of a new, more virulent variant such as Delta, "	no	emerge
INDIA	Hindu	State preparing to deal with possible third wave	2021-08-31	After	With the emergence of a new "C.1.2 lineage" of SARS-CoV-2, first detected in some provinces in South Africa in May and now in all South African provinces, the State will make special arrangements at its four international airports for disease surveillance.	no	emerge
UK	Sun	Why giving no booster jabs could become a terrible mistake;PROF'S VACCINE WARNING TO GOVT	2021-08-31	After	"variants can still develop here if our population is not well protected"	no	develop
CANADA	Star	Passport announcement coming this week;Ontario still waiting for proof-of-vaccination certificate for Canada	2021-08-31	After	"What's changed? As it has throughout the pandemic, COVID has changed," added the source,	no	change
CANADA	Star	These toxic protests reveal ugly new vision of Canada	2021-09-01	After	As most Canadians are now keenly aware, viruses can mutate.	no	mutate
